# Supplementary material for: Regiochemistry of cyclocondensation reactions in the synthesis of polyazaheterocycles
Source: PubMed Central journal article supplement (PMC5331339; doi:10.3762/bjoc.13.29), 2017-02-10
Supplement: Beilstein_J_Org_Chem-13-257-s001.pdf [file Beilstein_J_Org_Chem-13-257-s001.pdf]

**Supporting Information**  
**for**  
**Regiochemistry of cyclocondensation reactions**  
**in the synthesis of polyazaheterocycles**

Patrick T. Campos<sup>1</sup>, Leticia V. Rodrigues<sup>2</sup>, Andrei L. Belladonna<sup>2</sup>, Caroline R. Bender<sup>2</sup>, Juliana, S. Bitencurt<sup>2</sup>, Fernanda A. Rosa<sup>3</sup>, Davi F. Back<sup>4</sup>, Helio G. Bonacorso<sup>2</sup>, Nilo Zanatta<sup>2</sup>, Clarissa P. Frizzo<sup>2</sup>, and Marcos A. P. Martins<sup>2§\*</sup>

Address: <sup>1</sup>IFSul Campus de Pelotas, Instituto Federal de Educação, Ciência e Tecnologia Sul-Rio-Grandense, 96.015-360, Pelotas, RS, Brazil, <sup>2</sup>Núcleo de Química de Heterociclos (NUQUIMHE), Departamento de Química, Centro de Ciências Naturais e Exatas, Universidade Federal de Santa Maria, 97.105-900, Santa Maria, RS, Brazil, <sup>3</sup>Departamento de Química, Centro de Ciências Exatas, Universidade Estadual de Maringá, 87020-900, Maringá, PR, Brazil and <sup>4</sup>Departamento de Química, Universidade Federal de Santa Maria, 97105-900, Santa Maria, RS, Brazil

§Tel.: +55 55 3220-8756; Fax: +55 55 3220-8031;

Email: Marcos A. P. Martins - [mmartins@base.ufsm.br](mailto:mmartins@base.ufsm.br)

\*Corresponding author

**Additional information, characterization methods, experimental,  
analytical data, and copies of NMR spectra**

## 1. Additional Information

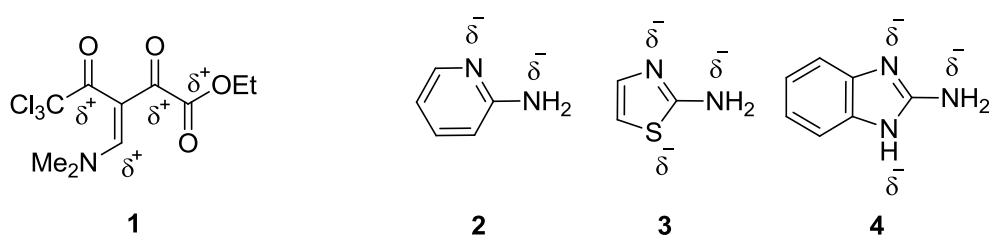

**Figure S1:** (A) Representation of  $\beta$ -enaminodiketone **1** electrophilic centers and (B) nucleophilic centers in structures for **2–4**.

**Table S1:** HOMO coefficients and charges for selected atoms in compounds **8a–f** obtained by DFT-B3LYP calculations.

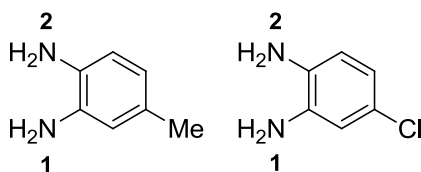

| Compound              | <b>8e</b> |           | <b>8f</b> |           |
|-----------------------|-----------|-----------|-----------|-----------|
| HOMO<br>(a.u.)        | -0.194    |           | -0.204    |           |
| Átoms                 | <i>N1</i> | <i>N2</i> | <i>N1</i> | <i>N2</i> |
| Coef. <sub>HOMO</sub> | 0.147     | 0.157     | 0.146     | 0.164     |
| Charge density        | -0.313    | -0.317    | -0.307    | -0.314    |

## 2. Characterization methods

The  $^1\text{H}$  and  $^{13}\text{C}$  spectra were recorded on a Bruker DPX 400 spectrometer ( $^1\text{H}$  NMR at 400 MHz and  $^{13}\text{C}$  NMR at 100.6 MHz), digital resolution of  $\pm 0.01$  ppm, with 0.5 M solutions in  $\text{CDCl}_3$  or DMSO as solvent. The ESI mass spectra was performed on an Agilent 6460 Triple Quadrupole, connected to a 1200

series LC. The mass spectrometer was operated in the positive jet stream electrospray ionization (ESI) mode. Elemental analyses were performed on a Perkin Elmer CHN elemental analyzer. The diffraction measurements were carried out by graphite monochromatized MoK $\alpha$  radiation with  $\lambda = 0.71073 \text{ \AA}$  on a Bruker SMART CCD diffractometer [1]. The structures were solved with direct methods using the SHELXS-97 program and refined on F2 by full-matrix least-squares by SHELXL-97 [2]. The absorption correction was performed by Gaussian methods [3]. The anisotropic displacement parameters for non-hydrogen atoms were applied. The hydrogen atoms were placed at calculated positions with 0.96  $\text{\AA}$  (methyl CH<sub>3</sub>), 0.97  $\text{\AA}$  (methylene CH<sub>2</sub>), 0.98  $\text{\AA}$  (methine CH), 0.93  $\text{\AA}$  (aromatic CH) and 0.86  $\text{\AA}$  (NH) using a riding model. The hydrogen isotropic thermal parameters were kept equal to  $U_{\text{iso}}(\text{H}) = xU_{\text{eq}}$  (carrier C atom), with  $x = 1.5$  for methyl groups and  $x = 1.2$  otherwise. The valence angles C–C–H and H–C–H of methyl groups was set to 109.5° and H atoms were allowed to rotate around the C–C bond. Molecular graphics were prepared using ORTEP3 for Windows [4,5].

The assignment of signals in the <sup>1</sup>H NMR spectra for the isomers of compounds **10** was difficult due to the similarity of the compounds but could be accomplished with the aid of two-dimensional NMR techniques as COSY and HETCOR. Firstly, for **10e** the singlet at 7.6 ppm is attributed to H37 and the same proton in compound **10e'** resonates as a multiplet in the range of 7.7–7.6 ppm. Protons H34 and H35 could be assigned through their coupling by COSY correlations. In case of **10e'** the protons H34 and the H35 appear as a multiplet in the range of 7.2–7.1 ppm and couple with H36 and H37. The carbon atoms

were attributed using the HETCOR experiment. The same sequence of steps was used for the assignment of the signals of the others regioisomers.

## **2.1. Theoretical calculations**

All theoretical calculations were performed with the Gaussian09 program package [6]. With the aim at obtaining the most stable regioisomer of the compounds, a 360° scan of the dihedral angle O=C–C=O change was performed in steps of 10° at the HF/6-31G level. A 360° scan of the dihedral angle N–C–C–N was also performed for the precursors 1,2-diaminepropane in steps of 10° at the HF/6-31G level. The more stable regioisomers were reoptimized at the B3LYP/cc-pVTZ level. All other geometries of the compounds were fully optimized at the B3LYP/cc-pVTZ level of theory and verified as minima in the potential energy by calculating the Hessian matrices by harmonic frequency calculations. HOMO and LUMO energy values and coefficients were obtained from geometries optimized at the B3LYP/cc-pVTZ level of theory.

## **2.2. X-ray crystallography.**

Atomic coordinates, bond lengths, bond angles, and thermal parameters for **6**, **9c** and **12g** have been deposited at the Cambridge Crystallographic Data Centre (CCDC). The data can be obtained free of charge via [www.ccdc.cam.ac.uk/conts/retrieving.html](http://www.ccdc.cam.ac.uk/conts/retrieving.html) (or from the CCDC, 12 Union Road, Cambridge CB21EZ; fax: +44 1223 335 033; or [deposit@ccdc.cam.ac.uk](mailto:deposit@ccdc.cam.ac.uk)). Any request to the CCDC for data should quote the full literature citation and CCDC reference numbers.

**Crystal data for 6.** Obtained from MeCN:  $C_{10}H_8N_2O_4S$ ,  $M = 252.24$ , space group  $P_{212121}$  (orthorhombic),  $a = 8.2539(2)$ ,  $b = 9.9582(2)$ ,  $c = 13.8149(4)$  Å,  $V = 1135.50(5)$  Å<sup>3</sup>,  $Z = 4$ ,  $D_c = 1.476$  g·cm<sup>3</sup>,  $\mu(\text{MoK}\alpha) = 0.289$  mm<sup>-1</sup>, 293(2) K, 10870 reflections collected, 2513 unique ( $R_{\text{int}} = 0.0434$ ), 2513 reflections with  $I > 2\sigma(I)$ , 155 parameters,  $R_1 = 0.1077$ ,  $wR_2$  (all data) = 0.1731.

CCDC reference number 846497.

**Crystal Data for 9c.** Obtained from MeCN/H<sub>2</sub>O 9:1:  $C_{16}H_{20}N_4O_4$ ,  $M = 332.36$ , space group  $P_{-1}$  (Triclinic),  $a = 8.6972(9)$ ,  $b = 9.4632(9)$ ,  $c = 10.6765(10)$  Å,  $\alpha = 68.046(6)^\circ$ ,  $\beta = 77.045(7)^\circ$ ,  $\gamma = 82.175(7)^\circ$ ,  $V = 792.91(13)$  Å<sup>3</sup>,  $Z = 2$ ,  $D_c = 1.392$  g·cm<sup>3</sup>,  $\mu(\text{MoK}\alpha) = 0.102$  mm<sup>-1</sup>, 293(2) K, 12857 reflections collected, 3019 unique ( $R_{\text{int}} = 0.0567$ ), 3019 reflections with  $I > 2\sigma(I)$ , 234 parameters,  $R_1 = 0.1107$ ,  $wR_2$  (all data) = 0.1753.

CCDC reference number 846499.

**Crystal Data for 12g.** Obtained from MeCN:  $C_{12}H_{10}N_4O_3$ ,  $M = 258.24$ , space group  $P_{-1}$  (Triclinic),  $a = 7.3807(4)$ ,  $b = 8.7049(6)$ ,  $c = 10.2452(6)$  Å,  $\alpha = 99.258(4)^\circ$ ,  $\beta = 110.800(4)^\circ$ ,  $\gamma = 105.762(4)^\circ$ ,  $V = 567.45(6)$  Å<sup>3</sup>,  $Z = 2$ ,  $D_c = 1.511$  g·cm<sup>3</sup>,  $\mu(\text{MoK}\alpha) = 0.113$  mm<sup>-1</sup>, 293(2) K, 9627 reflections collected, 2524 unique ( $R_{\text{int}} = 0.0279$ ), 2524 reflections with  $I > 2\sigma(I)$ , 172 parameters,  $R_1 = 0.0907$ ,  $wR_2$  (all data) = 0.1548.

CCDC reference number 846501.

**Table S2:** Data collection and structure refinement for structure of compound **6**, **9c** and **12g**.

| Compound                                                  | <b>6</b>                                                         | <b>9c</b>                                                        | <b>12g</b>                                                       |
|-----------------------------------------------------------|------------------------------------------------------------------|------------------------------------------------------------------|------------------------------------------------------------------|
| CCDC Number                                               | 846497                                                           | 846499                                                           | 846498                                                           |
| Empirical formula                                         | C <sub>10</sub> H <sub>8</sub> N <sub>2</sub> O <sub>4</sub> S   | C <sub>16</sub> H <sub>20</sub> N <sub>4</sub> O <sub>4</sub>    | C <sub>12</sub> H <sub>10</sub> N <sub>2</sub> O <sub>4</sub>    |
| Formula weight                                            | 252.24                                                           | 332.36                                                           | 246.22                                                           |
| Temperature (K)                                           | 293(2)                                                           | 293(2)                                                           | 293(2)                                                           |
| Wavelength (Å)                                            | 0.71073                                                          | 0.71073                                                          | 0.71073                                                          |
| Crystal system                                            | Ortorrhombic                                                     | Triclinic                                                        | Triclinic                                                        |
| Space group                                               | <i>P</i> <sub>212121</sub>                                       | <i>P</i> <sub>-1</sub>                                           | <i>P</i> <sub>-1</sub>                                           |
| <i>a</i> (Å)                                              | 8.2539(2)                                                        | 8.6972(9)                                                        | 6.6427(8)                                                        |
| <i>b</i> (Å)                                              | 9.9582(2)                                                        | 9.4632(9)                                                        | 6.8427(8)                                                        |
| <i>c</i> (Å)                                              | 13.8149(4)                                                       | 10.6765(10)                                                      | 13.4771(14)                                                      |
| α (deg)                                                   | 90                                                               | 68.046(6)                                                        | 98.711(7)                                                        |
| β (deg)                                                   | 90                                                               | 77.045(7)                                                        | 102.987(7)                                                       |
| γ (deg)                                                   | 90                                                               | 82.175(7)                                                        | 97.767(8)                                                        |
| Volume (Å <sup>3</sup> )                                  | 1135.50(5)                                                       | 792.91(13)                                                       | 580.86(11)                                                       |
| Z/density (calcd)(Mg/m <sup>3</sup> )                     | 4                                                                | 2                                                                | 2                                                                |
| Absorption coefficient (mm <sup>-1</sup> )                | 0.289                                                            | 1.392                                                            | 0.108                                                            |
| F(000) (e)                                                | 520                                                              | 352                                                              | 256                                                              |
| Crystal size (mm <sup>3</sup> )                           | 0.336 x 0.277 x 0.154                                            | 0.257 x 0.149 x 0.126                                            | 0.564 x 0.107 x 0.08                                             |
| θ range fo data collection (deg)                          | 2.87 to 27.11                                                    | 2.32 to 25.70                                                    | 3.06 to 26.46                                                    |
| Reflections collected/unique                              | 10870 /2513 [R(int) = 0.0434]                                    | 12857 / 3019 [R(int) = 0.0567]                                   | 9408 / 2382 [R(int) = 0.0338]                                    |
| Completeness to θ (%)                                     | (27.11) 99.9 %                                                   | (27.16) 98.9%                                                    | (27.29) 98.9%                                                    |
| Absorption correction                                     | Gaussian                                                         | Gaussian                                                         | Gaussian                                                         |
| Max, min transmission                                     | 0.9898, 0.9102                                                   | 0.99991, 0.90390                                                 | 0.9855, 0.9303                                                   |
| Refinement method                                         | Full-matrix least-squares on F <sup>2</sup>                      | Full-matrix least-squares on F <sup>2</sup>                      | Full-matrix least-squares on F <sup>2</sup>                      |
| Data/restraints/param.                                    | 2513 / 0 / 155                                                   | 3019 / 0 / 234                                                   | 2382 / 0 / 164                                                   |
| Goodness-of-fit on F <sup>2</sup>                         | 0.996                                                            | 1.033                                                            | 1.022                                                            |
| Final R indices [ <i>I</i> ≥ 2σ( <i>I</i> )] <sup>a</sup> | <i>R</i> <sub>1</sub> = 0.0583. w <i>R</i> <sub>2</sub> = 0.1380 | <i>R</i> <sub>1</sub> = 0.0567. w <i>R</i> <sub>2</sub> = 0.1436 | <i>R</i> <sub>1</sub> = 0.0489. w <i>R</i> <sub>2</sub> = 0.1253 |
| <i>R</i> <sub>1</sub> (all data) <sup>a</sup>             | <i>R</i> <sub>1</sub> = 0.1077. w <i>R</i> <sub>2</sub> = 0.1731 | <i>R</i> <sub>1</sub> = 0.1107. w <i>R</i> <sub>2</sub> = 0.1753 | <i>R</i> <sub>1</sub> = 0.0993. w <i>R</i> <sub>2</sub> = 0.1555 |

### 3. Experimental section

#### 3.1. General procedure for the preparation of compounds 5–7

A mixture of the amidine **2–4** (5 mmol) and  $\beta$ -enaminodiketone **1** (5 mmol) in acetonitrile (15 mL) was kept under stirring and reflux for 0.5 h. Subsequently, the acetonitrile was evaporated under reduced pressure, and the resulting solid was purified by column chromatography, using silica gel as stationary phase and a mixture of ethyl acetate and hexane (3:1) as eluent for compounds **5** and **6**. For compound **7**, acetonitrile was used as the eluent.

#### **Ethyl 2-oxo-2-(4-oxo-4H-pyrido[1,2-a]pyrimidin-3-yl) acetate (5)**

Yield 80%, m.p. 159.31 °C.  $^1\text{H}$  NMR (400 MHz,  $\text{CDCl}_3$ ):  $\delta$  1.42 (t, 3H, H35), 4.46 (q, 2H, H34), 7.47 (td, 1H,  $^1J_{\text{HH}} = 7.1$ ;  $^2J_{\text{HH}} = 1.5$ ; H8), 7.89 (ddd, 1H,  $^1J_{\text{HH}} = 8.8$ ;  $^2J_{\text{HH}} = 1.5$ ;  $^3J_{\text{HH}} = 0.7$ ; H6), 8.11 (ddd, 1H,  $^1J_{\text{HH}} = 8.8$ ;  $^2J_{\text{HH}} = 6.8$ ;  $^3J_{\text{HH}} = 1.7$ ; H7), 9.01 (s, 1H, H2), 9.26 (ddd, 1H,  $^1J_{\text{HH}} = 7.1$ ;  $^2J_{\text{HH}} = 1.5$ ;  $^3J_{\text{HH}} = 0.7$ ; H9).  $^{13}\text{C}$  NMR (100 MHz,  $\text{CDCl}_3$ ):  $\delta$  14.0 (C35), 62.2 (C34), 108.5 (C3), 118.2 (C8), 127.3 (C6), 128.7 (C9), 141.0 (C7), 153.9 (C4), 156.2 (C9a), 158.5 (C2), 165.0 (C32), 184.6 (C31). MS (ESI)  $m/z$ : [(M+H) $^+$ , 247], [(M+Na) $^+$ , 269]. Anal. Calcd for  $\text{C}_{12}\text{H}_{10}\text{N}_2\text{O}_4$ : C, 58.54; H, 4.09; N, 11.38. Found: C, 58.31; H, 4.23; N, 11.65.

#### **Ethyl 2-oxo-2-(5-oxo-5H-thiazolo[3,2-a]pyrimidin-6-yl) acetate (6)**

Yield 86%, m.p. 130.42 °C.  $^1\text{H}$  NMR (400 MHz,  $\text{CDCl}_3$ ):  $\delta$  1.41 (t, 3H,  $\text{CH}_3$ ), 4.44 (q, 2H,  $\text{CH}_2$ ), 7.31 (d, 1H,  $^1J_{\text{HH}} = 4.6$ , H7), 8.18 (d, 1H,  $^1J_{\text{HH}} = 4.9$ , H6), 8.80 (s, 1H, H2).  $^{13}\text{C}$  NMR (100 MHz,  $\text{CDCl}_3$ ):  $\delta$  13.9 (C35), 62.3 (C34), 110.9 (C3), 114.7 (C7), 123.3 (C6), 156.4 (C4), 157.9 (C2), 164.8 (C32), 168.4 (C8a), 184.5

(C31). MS (ESI)  $m/z$ : [(M+Na)<sup>+</sup>, 275]. Anal. Calcd for C<sub>10</sub>H<sub>8</sub>N<sub>2</sub>O<sub>4</sub>S: C, 47.61; H, 3.20; N, 11.11. Found: C, 47.34; H, 3.17; N, 11.05.

**Ethyl 2-oxo-2-(2-oxo-2*H*,6*H*-pyrimido[1,2-*a*]benzoimidazole-3-yl) acetate (7)**

Yield 56%, m.p. 262.96 °C. <sup>1</sup>H NMR (400 MHz, DMSO-*d*<sub>6</sub>): δ 1.34 (t, 3H, H35), 4.35 (q, 2H, H34), 7.43 (t, 1H, <sup>1</sup>*J*<sub>HH</sub> = 7.8; H7), 7.54 (t, 1H, <sup>1</sup>*J*<sub>HH</sub> = 7.8; H8), 7.63 (d, 1H, <sup>1</sup>*J*<sub>HH</sub> = 8.1; H9), 8.43 (d, 1H, <sup>1</sup>*J*<sub>HH</sub> = 8.1; H6), 8.70 (s, 1H, H2). <sup>13</sup>C NMR (100 MHz, DMSO-*d*<sub>6</sub>): δ 13.6 (C35), 61.0 (C34), 106.9 (C3), 113.2 (C9), 115.7 (C6), 123.2 (C7), 126.4 (C8), 126.5 (C5a), 132.3 (C9a), 151.6 (C4), 158.2 (C10a), 158.8 (C2), 165.3 (C32), 183.6 (C31). MS (ESI)  $m/z$ : [(M+H)<sup>+</sup>, 286], [(M+Na)<sup>+</sup>, 308]. Anal. Calcd for C<sub>14</sub>H<sub>11</sub>N<sub>3</sub>O<sub>4</sub>: C, 58.95; H, 3.89; N, 14.73. Found: C, 58.75; H, 3.87; N, 14.49.

**2. General procedure for the preparation of compounds 9a–f, 9b', 9e', 9f', 10c–f, 10e', 10f', 11a–e and 11b'**

A mixture of diamine **8a–f** (0.5 mmol) and α-ketoester **5–7** (0.5 mmol) in acetonitrile (2 mL) was kept under agitation and reflux for 2–24 h. The acetonitrile was then evaporated under reduced pressure, and the resulting solid was purified by washing with ethyl acetate (3 × 1 mL) for compounds **9a–f**, **9b'**, **9e'**, **9f'**, **10c–f**, **10e'**, **10f'**, **11a–e**, **11b'** and **11a**, and by simple filtration for compounds **11b–e** and **11b'**.



### **3-(3-Oxo-3,4,5,6-tetrahydropyrazin-2-yl)-4H-pyrido[1,2-a]pyrimidin-4-one**

#### **(9a)**

Yield 83%, - Decomposition Temperature. 251.07°. <sup>1</sup>H NMR (400 MHz, DMSO-*d*<sub>6</sub>): δ 3.39-3.35 (m, 2H, H34), 3.78 (t, 2H, H35), 7.44 (td, 1H, <sup>1</sup>*J*<sub>HH</sub> = 7.1; <sup>2</sup>*J*<sub>HH</sub> = 1.5; H8), 7.75 (ddd, 1H, <sup>1</sup>*J*<sub>HH</sub> = 8.8; <sup>2</sup>*J*<sub>HH</sub> = 1.5; <sup>3</sup>*J*<sub>HH</sub> = 0.7; H6), 8.03 (ddd, 1H, <sup>1</sup>*J*<sub>HH</sub> = 8.8; <sup>2</sup>*J*<sub>HH</sub> = 6.6; <sup>3</sup>*J*<sub>HH</sub> = 1.5; H7), 8.26 (bs, 1H, NH), 8.39 (s, 1H, H2), 9.00 (ddd, 1H, <sup>1</sup>*J*<sub>HH</sub> = 7.1; <sup>2</sup>*J*<sub>HH</sub> = 1.5; <sup>3</sup>*J*<sub>HH</sub> = 0.7; H9). <sup>13</sup>C NMR (100 MHz, DMSO-*d*<sub>6</sub>): δ 38.1 (C34), 48.3 (C35), 113.6 (C3), 116.9 (C8), 125.8 (C6), 127.0 (C9), 137.8 (C7), 151.4 (C4), 153.2 (C2), 155.2 (C9a), 155.4 (C32), 160.9 (C31). MS (ESI) *m/z*: [(M+H)<sup>+</sup>, 243], [(M+Na)<sup>+</sup>, 265]. Anal. Calcd for C<sub>12</sub>H<sub>10</sub>N<sub>4</sub>O<sub>2</sub>: C, 59.50; H, 4.16; N, 23.13. Found: C, 59.25; H, 4.11; N, 23.09.

### **3-(6-Methyl-3-oxo-3,4,5,6-tetrahydropyrazin-2-yl)-4H-pyrido[1,2-a]pyrimidin-4-one (9b)**

Yield 68% with 27% of isomer **9b**, m.p. 134.16 or 154.17°C. <sup>1</sup>H NMR (400 MHz, DMSO-*d*<sub>6</sub>): δ 3.12 (ddd, 1H, <sup>1</sup>*J*<sub>HH</sub> = 13; <sup>2</sup>*J*<sub>HH</sub> = 10.3; <sup>3</sup>*J*<sub>HH</sub> = 2; H34'), 3.44-3.37 (m, H34''), 3.86 -3.81 (m, 1H, H35), 7.46 (td, 1H, <sup>1</sup>*J*<sub>HH</sub> = 7.1; <sup>2</sup>*J*<sub>HH</sub> = 1.5; H8), 7.77 (d, 1H, <sup>1</sup>*J*<sub>HH</sub> = 8.8; H6), 8.05 (ddd, 1H, <sup>1</sup>*J*<sub>HH</sub> = 8.8; <sup>2</sup>*J*<sub>HH</sub> = 6.8; <sup>3</sup>*J*<sub>HH</sub> = 1.5; H7), 8.40 (s, 1H, H2), 8.46 (bs, 1H, NH33), 9.0 (d, 1H, <sup>1</sup>*J*<sub>HH</sub> = 7.3; H9). <sup>13</sup>C NMR (100 MHz, DMSO-*d*<sub>6</sub>): δ 18.5 (C351), 43.0 (C34), 54.9 (C35), 113.7 (C3), 117.1 (C8), 126.0 (C6), 127.1 (C9), 138.1 (C7), 151.5 (C4), 153.3 (C2), 155.4 (C9), 155.8 (C32), 160.8 (C31). MS (ESI) *m/z*: [(M+H)<sup>+</sup>, 257], [(M+Na)<sup>+</sup>, 279]. Anal. Calcd for C<sub>13</sub>H<sub>12</sub>N<sub>4</sub>O<sub>2</sub>: C, 60.93; H, 4.72; N, 21.86. Found: C, 59.11; H, 4.67; N, 21.57.

**3-(5-Methyl-3-oxo-3,4,5,6-tetrahydropyrazin-2-yl)-4H-pyrido[1,2-a]pyrimidin-4-one (9b')**

Yield 68% with 73% of isomer **9b'**, m.p. 134.16 or 154.17°C. <sup>1</sup>H NMR (400 MHz, DMSO-*d*<sub>6</sub>): δ 3.44-3.37 (m, H35''), 3.71 (m, 1H, H34), 3.95 (dd, 1H, <sup>1</sup>J<sub>HH</sub> = 16.1; <sup>2</sup>J<sub>HH</sub> = 4.1; H35'), 7.46 (td, 1H, <sup>1</sup>J<sub>HH</sub> = 7.1; <sup>2</sup>J<sub>HH</sub> = 1.5; H8), 7.77 (d, 1H, <sup>1</sup>J<sub>HH</sub> = 8.8; H6), 8.05 (ddd, 1H, <sup>1</sup>J<sub>HH</sub> = 8.8; <sup>2</sup>J<sub>HH</sub> = 6.8; <sup>3</sup>J<sub>HH</sub> = 1.5; H7), 8.39 (s, 1H, H2), 8.46 (bs, 1H, NH33), 9.0 (d, 1H, <sup>1</sup>J<sub>HH</sub> = 7.3; H9). <sup>13</sup>C NMR (100 MHz, DMSO-*d*<sub>6</sub>): δ 17.9 (C341), 44.0 (C34), 53.2 (C35), 113.7 (C3), 117.1 (C8), 126.0 (C6), 127.1 (C9), 138.1 (C7), 151.5 (C4), 153.3 (C2), 155.4 (C9), 155.8 (C32), 160.8 (C31). MS (ESI) *m/z*: [(M+H)<sup>+</sup>, 257], [(M+Na)<sup>+</sup>, 279]. Anal. Calcd for C<sub>13</sub>H<sub>12</sub>N<sub>4</sub>O<sub>2</sub>: C, 60.93; H, 4.72; N, 21.86. Found: C, 59.11; H, 4.67; N, 21.57.

**3-(3-Oxo-3,4,4a,5,6,7,8,8a-octahydroquinoxalin-2-yl)-4H-pyrido[1,2-a]pyrimidin-4-one (9c)**

Yield 72%, m.p. 214.04°C. <sup>1</sup>H NMR (400 MHz, DMSO-*d*<sub>6</sub>): δ 1.42-1.30 (m, 4H, H34''+H35''+H36''+H37''), 1.71 (d, 1H, <sup>1</sup>J<sub>HH</sub> = 9.8; H35'), 1.78 (d, 1H, <sup>1</sup>J<sub>HH</sub> = 9.3; H36'), 1.97 (d, 1H, <sup>1</sup>J<sub>HH</sub> = 10.3; H34'), 2.25 (d, 1H, <sup>1</sup>J<sub>HH</sub> = 9.8; H37'), 3.16-1.14 (m, 2H, H33a + H37a), 7.44 (td, 1H, <sup>1</sup>J<sub>HH</sub> = 7.1; <sup>2</sup>J<sub>HH</sub> = 1.2; H8), 7.75 (d, 1H, <sup>1</sup>J<sub>HH</sub> = 8.8; H6), 8.03 (ddd, 1H, <sup>1</sup>J<sub>HH</sub> = 8.8; <sup>2</sup>J<sub>HH</sub> = 7.1; <sup>3</sup>J<sub>HH</sub> = 1.5; H7), 8.33 (bs, 1H, NH), 8.39 (s, 1H, H2), 9.0 (d, 1H, <sup>1</sup>J<sub>HH</sub> = 7.1; H9). <sup>13</sup>C NMR (100 MHz, DMSO-*d*<sub>6</sub>): δ 23.1 (C35), 24.6 (C36), 30.1 (C34), 31.3 (C37), 53.8 (C33a), 62.9 (C37a), 113.4 (C3), 117.0 (C8), 125.9 (C6), 127.0 (C9), 138.0 (C7), 151.5 (C4), 153.3 (C2), 155.3 (C9a), 156.3 (C32), 160.3 (C31). MS (ESI) *m/z*: [(M+H)<sup>+</sup>, 297], [(M+Na)<sup>+</sup>, 319]. Anal. Calcd for C<sub>16</sub>H<sub>16</sub>N<sub>4</sub>O<sub>2</sub>: C, 64.85; H, 5.44; N, 18.91. Found: C, 64.61; H, 5.43; N, 18.62.

### **3-(3-Oxo-3,4-dihydroquinoxalin-2-yl)-4H-pyrido[1,2-a]pyrimidin-4-one (9d)**

Yield 87%, m.p. 304.93°C.  $^1\text{H}$  NMR (400 MHz, DMSO- $d_6$ ):  $\delta$  7.32 (ddd, 1H,  $^1J_{\text{HH}} = 8.1$ ;  $^2J_{\text{HH}} = 7.3$ ;  $^3J_{\text{HH}} = 1.5$ ; H36), 7.37 (dd, 1H,  $^1J_{\text{HH}} = 8.3$ ;  $^2J_{\text{HH}} = 1.5$ ; H34), 7.48 (td, 1H,  $^1J_{\text{HH}} = 7.1$ ;  $^2J_{\text{HH}} = 1.5$ ; H8), 7.55 (ddd, 1H,  $^1J_{\text{HH}} = 8.1$ ;  $^2J_{\text{HH}} = 7.3$ ;  $^3J_{\text{HH}} = 1.5$ ; H35), 7.82-7.79 (m, 2H, H6 e H37), 8.07 (ddd, 1H,  $^1J_{\text{HH}} = 8.8$ ;  $^2J_{\text{HH}} = 6.8$ ;  $^3J_{\text{HH}} = 1.5$ ; H7), 12.39 (bs, 1H, NH), 8.64 (s, 1H, H2), 9.1 (ddd, 1H,  $^1J_{\text{HH}} = 7.1$ ;  $^2J_{\text{HH}} = 1.5$ ;  $^3J_{\text{HH}} = 0.7$ ; H9).  $^{13}\text{C}$  NMR (100 MHz, DMSO- $d_6$ ):  $\delta$  112.4 (C3), 115.1 (C34), 116.9 (C8), 123.0 (C36), 125.9 (C6), 127.3 (C9), 128.4 (C37), 130.1 (C35), 131.8 (C33a), 132.1 (C37a), 138.0 (C7), 151.4 (C4), 153.7 (C32), 154.2 (C9a), 154.4 (C2), 154.8 (C31). MS (ESI)  $m/z$ : [(M+H) $^+$ , 291], [(M+Na) $^+$ , 313]. Anal. Calcd for C<sub>16</sub>H<sub>10</sub>N<sub>4</sub>O<sub>2</sub>: C, 66.20; H, 3.47; N, 19.30. Found: C, 65.92; H, 3.33; N, 19.31.

### **3-(7-Methyl-3-oxo-3,4-dihydroquinoxalin-2-yl)-4H-pyrido[1,2-a]pyrimidin-4-one (9e)**

Yield 65% with 44% of isomer **9e**, m.p. 211.80 or 216.55°C.  $^1\text{H}$  NMR (400 MHz, DMSO- $d_6$ ):  $\delta$  2.46 (s, 3H, H361), 7.26 (d, 1H,  $^1J_{\text{HH}} = 8.1$ ; H35), 7.38 (d, 1H,  $^1J_{\text{HH}} = 8.1$ ; H34), 7.47 (t, 1H,  $^1J_{\text{HH}} = 7.1$ ; H8), 7.01 (s, 1H, H37), 7.79 (d, 1H,  $^1J_{\text{HH}} = 8.8$ ; H6), 8.06 (t, 1H,  $^1J_{\text{HH}} = 6.8$ ; H7), 8.61 (s, 1H, H2), 9.09 (d, 1H,  $^1J_{\text{HH}} = 7.1$ ; H9), 12.31 (bs, 1H, H33).  $^{13}\text{C}$  NMR (100 MHz, DMSO- $d_6$ ):  $\delta$  21.1 (C361), 114.8 (C35), 116.9 (C8), 125.9 (C6), 127.3 (C9), 128.2 (C37), 130.2 (C33a), 131.3 (C34), 132.0 (C37a), 137.9 (C7), 140.5 (C36), 151.8 (C4), 152.9 (C32), 154.0 (C9a), 154.3 (C2), 154.8 (C31). MS (ESI)  $m/z$ : [(M+H) $^+$ , 305], [(M+Na) $^+$ , 327]. Anal. Calcd for C<sub>17</sub>H<sub>12</sub>N<sub>4</sub>O<sub>2</sub>: C, 67.10; H, 3.97; N, 18.41. Found: C, 67.02; H, 3.88; N, 18.18.

**3-(6-Methyl-3-oxo-3,4-dihydroquinoxalin-2-yl)-4H-pyrido[1,2-a]pyrimidin-4-one (9e')**

Yield 65% with 56% of isomer **9e'**, m.p. 211.80 or 216.55°C. <sup>1</sup>H NMR (400 MHz, DMSO-*d*<sub>6</sub>): δ 2.40 (s, 3H, H351), 7.15-7.14 (m, 2H, H34+H36), 7.47 (t, 1H, <sup>1</sup>J<sub>HH</sub> = 7.1; H8), 7.68 (d, 1H, <sup>1</sup>J<sub>HH</sub> = 8.6), 7.79 (d, 1H, <sup>1</sup>J<sub>HH</sub> = 8.8; H6), 8.06 (t, 1H, <sup>1</sup>J<sub>HH</sub> = 6.8; H7), 8.61 (s, 1H, H2), 9.09 (d, 1H, <sup>1</sup>J<sub>HH</sub> = 7.1; H9), 12.31 (bs, 1H, H33). <sup>13</sup>C NMR (100 MHz, DMSO-*d*<sub>6</sub>): δ 20.1 (C351), 114.7 (C36), 116.9 (C8), 124.4 (C34), 125.9 (C6), 127.3 (C9), 128.0 (C37), 129.8 (C33a), 131.8 (C37a), 132.4 (C35), 137.9 (C7), 151.3 (C4), 153.6 (C32), 153.9 (C9a), 154.3 (C2), 154.8 (C31). MS (ESI) *m/z*: [(M+H)<sup>+</sup>, 305], [(M+Na)<sup>+</sup>, 327]. Anal. Calcd for C<sub>17</sub>H<sub>12</sub>N<sub>4</sub>O<sub>2</sub>: C, 67.10; H, 3.97; N, 18.41. Found: C, 67.02; H, 3.88; N, 18.18.

**3-(7-Chloro-3-oxo-3,4-dihydroquinoxalin-2-yl)-4H-pyrido[1,2-a]pyrimidin-4-one (9f)**

Yield 66% with 55% of isomer **9f**, m.p. 259.47 or 281.99°C. <sup>1</sup>H NMR (400 MHz, DMSO-*d*<sub>6</sub>): δ 7.38 (d, 1H, <sup>1</sup>J<sub>HH</sub> = 8.8; H35), 7.48 (td, 1H, <sup>1</sup>J<sub>HH</sub> = 7.1; <sup>2</sup>J<sub>HH</sub> = 1.2; H8), 7.57 (dd, 1H, <sup>1</sup>J<sub>HH</sub> = 8.8; <sup>2</sup>J<sub>HH</sub> = 2.4; H34), 7.8 (d, 1H, <sup>1</sup>J<sub>HH</sub> = 8.6; H6), 7.83 (d, 1H, <sup>1</sup>J<sub>HH</sub> = 2.4; H37), 8.08 (ddd, 1H, <sup>1</sup>J<sub>HH</sub> = 8.8; <sup>2</sup>J<sub>HH</sub> = 6.6; <sup>3</sup>J<sub>HH</sub> = 1.5; H7), 8.65 (s, 1H, H2), 9.09 (d, 1H, <sup>1</sup>J<sub>HH</sub> = 7.1; H9), 12.47 (bs, 1H, NH33). <sup>13</sup>C NMR (100 MHz, DMSO-*d*<sub>6</sub>): δ 111.9 (C3), 116.7 (C35), 117.0 (C8), 125.9 (C6), 127.3 (C9), 127.3 (C37), 130.0 (C34), 131.0 (C33a), 133.1 (C37a), 134.2 (C36), 138.2 (C7), 151.5 (C4), 153.4 (C32), 154.5 (C9a), 154.6 (C2), 155.5 (C31). MS (ESI) *m/z*: [(M+H)<sup>+</sup>, 325], [(M+Na)<sup>+</sup>, 347]. Anal. Calcd for C<sub>16</sub>H<sub>9</sub>ClN<sub>4</sub>O<sub>2</sub>: C, 59.18; H, 2.79; N, 17.25. Found: C, 58.98; H, 2.85; N, 16.97.

**3-(6-Chloro-3-oxo-3,4-dihydroquinoxalin-2-yl)-4H-pyrido[1,2-a]pyrimidin-4-one (9f')**

Yield 66% with 45% of isomer **9f'**, m.p. 259.47 or 281.99°C. <sup>1</sup>H NMR (400 MHz, DMSO-*d*<sub>6</sub>): δ 7.32 (dd, 1H, <sup>1</sup>J<sub>HH</sub> = 8.6; <sup>2</sup>J<sub>HH</sub> = 2.2; H36), 7.38 (d, 1H, <sup>1</sup>J<sub>HH</sub> = 2.2; H34), 7.48 (td, 1H, <sup>1</sup>J<sub>HH</sub> = 7.1; <sup>2</sup>J<sub>HH</sub> = 1.2; H8), 7.8 (d, 2H, <sup>1</sup>J<sub>HH</sub> = 8.6; H6+H37), 8.07 (ddd, 1H, <sup>1</sup>J<sub>HH</sub> = 8.6; <sup>2</sup>J<sub>HH</sub> = 6.8; <sup>3</sup>J<sub>HH</sub> = 1.7; H7), 8.64 (s, 1H, H2), 9.09 (d, 1H, <sup>1</sup>J<sub>HH</sub> = 7.1; H9), 12.47 (bs, 1H, NH33). <sup>13</sup>C NMR (100 MHz, DMSO-*d*<sub>6</sub>): δ 111.9 (C3), 114.4 (C34), 117.0 (C8), 123.1 (C36), 125.9 (C6), 126.7 (C35), 127.3 (C9), 129.9 (C37), 130.6 (C33a), 132.4 (C37a), 138.2 (C7), 151.4 (C4), 154.4 (C32), 154.5 (C9a), 154.6 (C2), 155.5 (C31). MS (ESI) *m/z*: [(M+H)<sup>+</sup>, 325], [(M+Na)<sup>+</sup>, 347]. Anal. Calcd for C<sub>16</sub>H<sub>9</sub>ClN<sub>4</sub>O<sub>2</sub>: C, 59.18; H, 2.79; N, 17.25. Found: C, 58.98; H, 2.85; N, 16.97.

**6-(3-Oxo-3,4,4a,5,6,7,8,8a-octahydroquinoxalin-2-yl)-5H-thiazolo[3,2-a]pyrimidin-5-one (10c)**

Yield 77%. <sup>1</sup>H NMR (400 MHz, DMSO-*d*<sub>6</sub>): δ 1.40-1.29 (m, 4H, H34'+H35'+H36'+H37'), 1.70 (d, 1H, <sup>1</sup>J<sub>HH</sub> = 10; H35'), 1.78 (d, 1H, <sup>1</sup>J<sub>HH</sub> = 10; H36'), 1.95 (d, 1H, <sup>1</sup>J<sub>HH</sub> = 8.8; H34'), 2.24 (d, 1H, <sup>1</sup>J<sub>HH</sub> = 9.0; H37'), 3.14-3.12 (m, 2H, H33a+H37a), 7.63 (d, 1H, <sup>1</sup>J<sub>HH</sub> = 4.9), 8.08 (d, 1H, <sup>1</sup>J<sub>HH</sub> = 4.6; H6), 8.12 (s, 1H, H2), 8.34 (bs, 1H, NH). <sup>13</sup>C NMR (100 MHz, DMSO-*d*<sub>6</sub>): δ 23.1 (C35), 24.6 (C36), 30.0 (C34), 31.2 (C37), 53.7 (C33a), 62.8 (C37a), 114.4 (C7), 115.3 (C3), 121.8 (C6), 151.8 (C2), 155.9 (C4), 156.1 (C32), 159.9 (C8a), 163.9 (C31). MS (ESI) *m/z*: [(M+H)<sup>+</sup>, 303], [(M+Na)<sup>+</sup>, 325]. Anal. Calcd for C<sub>14</sub>H<sub>14</sub>N<sub>4</sub>O<sub>2</sub>S: C, 55.61; H, 4.67; N, 18.53.

**6-(3-Oxo-3,4-dihydroquinoxalin-2-yl)-5H-thiazolo[3,2-a]pyrimidin-5-one**

**(10d)**

Yield 93%, m.p. 348.02°C.  $^1\text{H}$  NMR (400 MHz, DMSO- $d_6$ ):  $\delta$  7.32 (t, 1H,  $^1J_{\text{HH}} = 7.8$ , H36), 7.36 (d, 1H,  $^1J_{\text{HH}} = 8.1$ , H34), 7.55 (t, 1H,  $^1J_{\text{HH}} = 7.8$ , H35), 7.66 (d, 1H,  $^1J_{\text{HH}} = 4.6$ , H7), 7.79 (d, 1H,  $^1J_{\text{HH}} = 7.8$ , H37), 8.15 (d, 1H,  $^1J_{\text{HH}} = 4.9$ , H6), 8.36 (s, 1H, H2).  $^{13}\text{C}$  NMR (100 MHz, DMSO- $d_6$ ):  $\delta$  114.4 (C3), 114.5 (C7), 115.3 (C34), 122.2 (C6), 123.3 (C36), 128.6 (C37), 130.5 (C34), 131.9 (C33a), 132.2 (C37a), 153.0 (C2), 153.7 (C4), 153.8 (C32), 155.7 (C8a), 164.1 (C31). MS (ESI)  $m/z$ : [(M+H) $^+$ , 297], [(M+Na) $^+$ , 319]. Anal. Calcd for C<sub>14</sub>H<sub>8</sub>N<sub>4</sub>O<sub>2</sub>S: C, 56.75; H, 2.72; N, 18.91. Found: C, 56.48; H, 2.52; N, 18.80.

**6-(7-Methyl-3-oxo-3,4-dihydroquinoxalin-2-yl)-5H-thiazolo[3,2-a]pyrimidin-5-one (10e)**

Yield 70% with 42% of isomer **10e**, m.p. 302.90 or 315.75°C.  $^1\text{H}$  NMR (400 MHz, DMSO- $d_6$ ):  $\delta$  2.43 (s, 3H, H361), 7.25 (d, 1H,  $^1J_{\text{HH}} = 8.3$ ; H35), 7.38 (d, 1H,  $^1J_{\text{HH}} = 8.8$ ; H34), 7.59 (s, 1H, H37), 7.68-7.65 (m, 1H, H7), 8.15 (d, 1H,  $^1J_{\text{HH}} = 4.6$ ; H6), 8.35 (s, 1H, H2), 12.3 (bs, 1H, H33).  $^{13}\text{C}$  NMR (100 MHz, DMSO- $d_6$ ):  $\delta$  21.1 (C361), 114.2 (C7), 114.4 (C4), 114.7 (C35), 122.1 (C6), 128.2 (C37), 129.8 (C33a), 131.4 (C34), 132.0 (C37a), 140.6 (C36), 152.8 (C2), 153.6 (C4), 153.6 (C32), 155.5 (C8a), 163.8 (C31). MS (ESI)  $m/z$ : [(M+H) $^+$ , 311], [(M+Na) $^+$ , 333], [(M+K) $^+$ , 349]. Anal. Calcd for C<sub>15</sub>H<sub>10</sub>N<sub>4</sub>O<sub>2</sub>S: C, 58.05; H, 3.25; N, 18.05. Found: C, 58.19; H, 3.21; N, 18.04.

**6-(6-Methyl-3-oxo-3,4-dihydroquinoxalin-2-yl)-5H-thiazolo[3,2-a]pyrimidin-5-one (10e')**

Yield 70% with 58% of isomer **17**, m.p. 302.90 or 315.75°C. <sup>1</sup>H NMR (400 MHz, DMSO-*d*<sub>6</sub>): δ 2.39 (s, 3H, H351), 7.15-7.13 (m, 2H, H34+H36), 7.68-7.65 (m, 1H, H7+H37), 8.15 (d, 1H, <sup>1</sup>J<sub>HH</sub> = 4.6; H6), 8.35 (s, 1H, H2), 12.3 (bs, 1H, H33). <sup>13</sup>C NMR (100 MHz, DMSO-*d*<sub>6</sub>): δ 20.1 (C351), 114.2 (C7), 114.4 (C4), 114.8 (C36), 122.1 (C6), 124.4 (C34), 128.1 (C37), 130.1 (C37), 131.7 (C37a), 132.4 (C35), 152.4 (C4), 152.8 (C2), 153.8 (C32), 155.5 (C8a), 163.7 (C31).

MS (ESI) *m/z*: [(M+H)<sup>+</sup>, 311], [(M+Na)<sup>+</sup>, 333], [(M+K)<sup>+</sup>, 349]. Anal. Calcd for C<sub>15</sub>H<sub>10</sub>N<sub>4</sub>O<sub>2</sub>S: C, 58.05; H, 3.25; N, 18.05. Found: C, 58.19; H, 3.21; N, 18.04.

**6-(7-Chloro-3-oxo-3,4-dihydroquinoxalin-2-yl)-5H-thiazolo[3,2-a]pyrimidin-5-one (10f)**

Yield 66% with 48% of isomer **10f**, m.p. 150.61 or 171.00°C. <sup>1</sup>H NMR (400 MHz, DMSO-*d*<sub>6</sub>): δ 7.38-7.35 (m, 1H, H35), 7.58 (dd, 1H, <sup>1</sup>J<sub>HH</sub> = 8.6; <sup>2</sup>J<sub>HH</sub> = 2.2; H34), 7.68 (d, 1H, <sup>1</sup>J<sub>HH</sub> = 4.6; H7), 7.82 (d, 1H, <sup>1</sup>J<sub>HH</sub> = 2.2; H37), 8.16 (d, 1H, <sup>1</sup>J<sub>HH</sub> = 4.9; H6), 8.39 (s, 1H, H2), 12.51 (bs, 1H, NH33). <sup>13</sup>C NMR (100 MHz, DMSO-*d*<sub>6</sub>): δ 113.91 (C3), 114.53 (C7), 116.8 (C35), 122.2 (C6), 127.5 (C37), 130.2 (C34), 131.1 (C33a), 133.2 (C37a), 134.4 (C36), 153.2 (C2), 153.5 (C4), 154.1 (C32), 155.4 (C8a), 164.2 (C31). MS (ESI) *m/z*: [(M+H)<sup>+</sup>, 331], [(M+Na)<sup>+</sup>, 353]. Anal. Calcd for C<sub>14</sub>H<sub>7</sub>ClN<sub>4</sub>O<sub>2</sub>S: C, 50.84; H, 2.13; N, 16.94. Found: C, 50.61; H, 2.33; N, 17.03.

**6-(6-Chloro-3-oxo-3,4-dihydroquinoxalin-2-yl)-5H-thiazolo[3,2-a]pyrimidin-5-one (10f')**

Yield 66% with 52% of isomer **10f'**, m.p. 150.61 or 171.00°C. <sup>1</sup>H NMR (400 MHz, DMSO-*d*<sub>6</sub>): δ 7.32 (dd, 1H, <sup>1</sup>J<sub>HH</sub> = 8.6; <sup>2</sup>J<sub>HH</sub> = 2.2; H36), 7.38-7.35 (m, 1H, H34), 7.68 (d, 1H, <sup>1</sup>J<sub>HH</sub> = 4.6; H7), 7.79 (d, 1H, <sup>1</sup>J<sub>HH</sub> = 8.6; H37), 8.15 (d, 1H, <sup>1</sup>J<sub>HH</sub> = 4.6; H6), 8.38 (s, 1H, H2), 12.51 (bs, 1H, NH33). <sup>13</sup>C NMR (100 MHz, DMSO-*d*<sub>6</sub>): δ 113.9 (C3), 114.5 (C34), 114.5 (C7), 122.2 (C6), 123.3 (C36), 126.8 (C35), 130.2 (C37), 130.6 (C33a), 132.3 (C37a), 153.2 (C2), 153.5 (C4), 155.2 (C32), 155.4 (C8a), 164.1 (C31). MS (ESI) *m/z*: [(M+H)<sup>+</sup>, 331], [(M+Na)<sup>+</sup>, 353]. Anal. Calcd for C<sub>14</sub>H<sub>7</sub>ClN<sub>4</sub>O<sub>2</sub>S: C, 50.84; H, 2.13; N, 16.94. Found: C, 50.61; H, 2.33; N, 17.03.

**3-(3-Oxo-3,4,5,6-tetrahydropyrazin-2-yl)-2-oxo-2H,6H-pyrimido[1,2-a]benzoimidazole (11a)**

Yield 78%, m.p. 251.22°C. <sup>1</sup>H NMR (400 MHz, DMSO-*d*<sub>6</sub>): δ 3.46 (t, 2H, H35), 3.80 (t, 2H, H35), 7.31 (ddd, 1H, <sup>1</sup>J<sub>HH</sub> = 8.1; <sup>2</sup>J<sub>HH</sub> = 7.3; <sup>3</sup>J<sub>HH</sub> = 1.2; H7), 7.42 (ddd, 1H, <sup>1</sup>J<sub>HH</sub> = 8.1; <sup>2</sup>J<sub>HH</sub> = 7.3; <sup>3</sup>J<sub>HH</sub> = 1.2; H8), 7.64 (d, 1H, <sup>1</sup>J<sub>HH</sub> = 8.1; H9), 8.36 (ddd, 1H, <sup>1</sup>J<sub>HH</sub> = 8.1; <sup>2</sup>J<sub>HH</sub> = 1.2; <sup>3</sup>J<sub>HH</sub> = 0.7; H6), 9.06 (s, 1H, H2). <sup>13</sup>C NMR (100 MHz, DMSO-*d*<sub>6</sub>): δ 37.6 (C34), 43.2 (C35), 114.9 (C9), 116.9 (C6), 121.7 (C7), 124.8 (C8), 128.0 (C5a), 140.7 (C9a), 152.4 (C4), 156.6 (C2), 157.2 (C32), 159.0 (C10a), 161.0 (C31). MS (ESI) *m/z*: [(M+H)<sup>+</sup>, 282], [(M+Na)<sup>+</sup>, 304]. Anal. Calcd for C<sub>14</sub>H<sub>11</sub>N<sub>5</sub>O<sub>2</sub>: C, 59.78; H, 3.94; N, 24.90. Found: C, 59.41; H, 3.89; N, 24.63.



**3-(6-Methyl-3-oxo-3,4,5,6-tetrahydropyrazin-2-yl)-2-oxo-2H,6H-pyrimido[1,2-a]benzoimidazole (11b)**

Yield 89% with 50% of isomer **11b**, m.p. 160.78 or 197.26°C. <sup>1</sup>H NMR (400 MHz, DMSO-*d*<sub>6</sub>): δ 1.36 (d, 3H, <sup>1</sup>J<sub>HH</sub> = 6.6; H351), 3.25 (dd, 1H, <sup>1</sup>J<sub>HH</sub> = 13; <sup>2</sup>J<sub>HH</sub> = 8.1; H34'), 3.55-3.44 (m, 1H, H34''), 4.08-4.00 (m, 1H, H35), 7.31 (t, 1H, <sup>1</sup>J<sub>HH</sub> = 7.8; H7), 7.43 (t, 1H, <sup>1</sup>J<sub>HH</sub> = 7.8; H8), 7.65 (dd, 1H, <sup>1</sup>J<sub>HH</sub> = 7.8; <sup>2</sup>J<sub>HH</sub> = 3.9, H9), 8.36 (d, 1H, <sup>1</sup>J<sub>HH</sub> = 7.8, H6), 9.07 (s, 1H, H2). <sup>13</sup>C NMR (100 MHz, DMSO-*d*<sub>6</sub>): δ 17.5 (C351), 43.4 (C34), 49.5 (C35), 101.7 (C3), 114.9 (C9), 116.8 (C6), 121.4 (C7), 124.7 (C8), 128.0 (C5a), 140.8 (C9a), 152.6 (C4), 156.4 (C2), 156.7 (C32), 158.7 (C10a), 161.0 (C31). MS (ESI) *m/z*: [(M+H)<sup>+</sup>, 296]. Anal. Calcd for C<sub>15</sub>H<sub>13</sub>N<sub>5</sub>O<sub>2</sub>: C, 61.01; H, 4.44; N, 23.72. Found: C, 60.81; H, 4.56; N, 23.81.

**3-(5-Methyl-3-oxo-3,4,5,6-tetrahydropyrazin-2-yl)-2-oxo-2H,6H-pyrimido[1,2-a]benzoimidazole (11b')**

Yield 89% with 50% of isomer **11b'**, m.p. 160.78 or 197.26°C. <sup>1</sup>H NMR (400 MHz, DMSO-*d*<sub>6</sub>): δ 1.22 (d, 3H, <sup>1</sup>J<sub>HH</sub> = 6.6; H341), 3.55-3.44 (m, 1H, H35''), 3.84-3.78 (m, 1H, H34), 3.9 (dd, 1H, <sup>1</sup>J<sub>HH</sub> = 14.7; <sup>2</sup>J<sub>HH</sub> = 4.2; H35'), 7.31 (t, 1H, <sup>1</sup>J<sub>HH</sub> = 7.8; H7), 7.43 (t, 1H, <sup>1</sup>J<sub>HH</sub> = 7.8; H8), 7.65 (dd, 1H, <sup>1</sup>J<sub>HH</sub> = 7.8; <sup>2</sup>J<sub>HH</sub> = 3.9, H9), 8.36 (d, 1H, <sup>1</sup>J<sub>HH</sub> = 7.8, H6), 8.96 (s, 1H, H2). <sup>13</sup>C NMR (100 MHz, DMSO-*d*<sub>6</sub>): δ 17.3 (C341), 44.6 (C34), 49.3 (C35), 100.9 (C3), 114.8 (C9), 116.5 (C6), 121.3 (C7), 124.8 (C8), 127.9 (C5a), 140.5 (C9a), 152.5 (C4), 156.4 (C2), 157.0 (C32), 158.4 (C10a), 160.8 (C31). MS (ESI) *m/z*: [(M+H)<sup>+</sup>, 296]. Anal. Calcd for C<sub>15</sub>H<sub>13</sub>N<sub>5</sub>O<sub>2</sub>: C, 61.01; H, 4.44; N, 23.72. Found: C, 60.81; H, 4.56; N, 23.81.

**3-(3-Oxo-3,4,4a,5,6,7,8,8a-octahydroquinoxalin-2-yl)-2-oxo-2H,6H-pyrimido[1,2-a]benzoimidazole (11c)**

Yield 91%, m.p. 231.06°C. <sup>1</sup>H NMR (400 MHz, DMSO-*d*<sub>6</sub>): δ 1,50-1,28 (m, 4H, H34''+H35''+H36''+H37''); 1,81-1,65 (m, 2H, H35'+H36'); 1,98 (d, 1H, <sup>1</sup>J<sub>HH</sub> = 11,2; H34'); 2,25 (d, 1H, <sup>1</sup>J<sub>HH</sub> = 9,0; H37'); 3,39-3,27 (m, 1H, 2H); 7,34-7,30 (m, 1H, H7); 7,44 (ddd, <sup>1</sup>J<sub>HH</sub> = 7,8; <sup>2</sup>J<sub>HH</sub> = 7,6; <sup>3</sup>J<sub>HH</sub> = 1,2; H8); 7,66-7,62 (m, 1H, H9); 8,37 (ddd, 1H, <sup>1</sup>J<sub>HH</sub> = 8,1; <sup>2</sup>J<sub>HH</sub> = 1,2; <sup>3</sup>J<sub>HH</sub> = 0,7; H6); 8,85 (bs, 1H, H2); tautomer 1,50-1,28 (m, 4H, H34''+H35''+H36''+H37''); 1,81-1,65 (m, 2H, H35'+H36'); 1,98 (d, 1H, <sup>1</sup>J<sub>HH</sub> = 11,2; H34'); 2,25 (d, 1H, <sup>1</sup>J<sub>HH</sub> = 9,0; H37'); 3,39-3,27 (m, 1H, 2H); 7,34-7,30 (m, 1H, H7); 7,43 (ddd, <sup>1</sup>J<sub>HH</sub> = 8,1; <sup>2</sup>J<sub>HH</sub> = 7,3; <sup>3</sup>J<sub>HH</sub> = 1,2; H8); 7,66-7,62 (m, 1H, H9); 8,36 (ddd, 1H, <sup>1</sup>J<sub>HH</sub> = 7,8; <sup>2</sup>J<sub>HH</sub> = 1,2; <sup>3</sup>J<sub>HH</sub> = 0,7; H6); 8,85 (bs, 1H, H2). MS (ESI) *m/z*: [(M+H)<sup>+</sup>, 336]. Anal. Calcd for C<sub>18</sub>H<sub>17</sub>N<sub>5</sub>O<sub>2</sub>: C, 64.47; H, 5.11; N, 20.88. Found: C, 64.22; H, 5.01; N, 20.56.

**3-(3-Oxo-3,4-dihydroquinoxalin-2-yl)-2-oxo-2H,6H-pyrimido[1,2-a]benzoimidazole (11d)**

Yield 52%, m.p. 377,22°C. <sup>1</sup>H NMR (400 MHz, DMSO-*d*<sub>6</sub>): δ 7.31 (ddd, <sup>1</sup>J<sub>HH</sub> = 8.1; <sup>2</sup>J<sub>HH</sub> = 7.6; <sup>3</sup>J<sub>HH</sub> = 1.2; H36), 7.40-7.35 (m, 2H, H7+H34), 7.51 (td, 1H, <sup>1</sup>J<sub>HH</sub> = 8.1; <sup>2</sup>J<sub>HH</sub> = 1.2; H35), 7.53 (ddd, 1H, <sup>1</sup>J<sub>HH</sub> = 8.1; <sup>2</sup>J<sub>HH</sub> = 7.3; <sup>3</sup>J<sub>HH</sub> = 1.5; H8), 7.58 (d, 1H, <sup>1</sup>J<sub>HH</sub> = 8.1; H9), 7.79 (dd, 1H, <sup>1</sup>J<sub>HH</sub> = 8.1; <sup>2</sup>J<sub>HH</sub> = 1.2; H37), 8.36 (s, 1H, H2), 8.49 (d, 1H, <sup>1</sup>J<sub>HH</sub> = 7.8; H6), 12.29 (bs, 1H, NH33). <sup>13</sup>C NMR (100 MHz, DMSO-*d*<sub>6</sub>): δ 110.4 (C3), 112.4 (C34), 115.0 (C9), 115.5 (C6), 121.9 (C7), 122.9 (C8), 126.0 (C36), 126.4 (C5a), 128.3 (C37), 129.8 (C35), 131.86 (C33a), 131.93 (C37a), 132.6 (C9a), 149.0 (C4), 152.0 (C32), 154.0 (C2), 154.1 (C10a),

157.0 (C31). MS (ESI)  $m/z$ : [(M+H)<sup>+</sup>, 330]. Anal. Calcd for C<sub>18</sub>H<sub>11</sub>N<sub>5</sub>O<sub>2</sub>: C, 65.65; H, 3.37; N, 21.27. Found: C, 65.42; H, 3.50; N, 21.03.

**3-(7-Methyl-3-oxo-3,4-dihydroquinoxalin-2-yl)-2-oxo-2H,6H-pyrimido[1,2-a]benzoimidazole (11e)**

Yield 56% with 48% of isomer **11e**, Decomposition Temperature.. 300.00°C <sup>1</sup>H NMR (400 MHz, DMSO-*d*<sub>6</sub>): δ 2.43 (s, 3H, H361), 7.25 (d, 1H, H35), 7.39-7.34 (m, 2H, H7+H34), 7.51 (t, 1H, <sup>1</sup>J<sub>HH</sub> = 8.1; H8), 7.39 (s, 1H, H37), 7.59-7.58 (m, 1H, H9), 8.50 (s, 1H, H2), 12.22 (bs, 1H, NH33). <sup>13</sup>C NMR (100 MHz, DMSO-*d*<sub>6</sub>): δ 21.0 (C361), 110.5 (C3), 112.4 (C9), 114.8 (C35), 115.5 (C6), 121.9 (C7), 126.0 (C8), 126.4 (C34), 128.1 (C37), 129.7 (C33a), 131.8 (C5a), 131.9 (C37a), 132.6 (C9a), 140.1 (C36), 149.0 (C4), 151.9 (C32), 153.9 (C2), 154.2 (C10a), 157.0 (C31). MS (ESI)  $m/z$ : [(M+H)<sup>+</sup>, 344], [(M+Na)<sup>+</sup>, 366]. Anal. Calcd for C<sub>19</sub>H<sub>13</sub>N<sub>5</sub>O<sub>2</sub>: C, 66.47; H, 3.82; N, 20.40. Found: C, 66.91; H, 4.11; N, 20.19.

**3-(6-Methyl-3-oxo-3,4-dihydroquinoxalin-2-yl)-2-oxo-2H,6H-pyrimido[1,2-a]benzoimidazole (11e')**

Yield 56% with 48% of isomer **11e'**, Decomposition Temperature . 300.00°C <sup>1</sup>H NMR (400 MHz, DMSO-*d*<sub>6</sub>): δ 2.40 (s, 3H, H351), 7.14-7.12 (m, 2H, H34+H36), 7.39-7.34 (m, 2H, H7), 7.51 (t, 1H, <sup>1</sup>J<sub>HH</sub> = 8.1; H8), 7.59-7.58 (m, 1H, H9), 7.66 (d, 1H, <sup>1</sup>J<sub>HH</sub> = 8.3; H37), 8.48 (s, 1H, H2), 12.22 (bs, 1H, NH33). <sup>13</sup>C NMR (100 MHz, DMSO-*d*<sub>6</sub>): δ 20.2 (C351), 110.5 (C3), 112.4 (C9), 114.6 (C36), 115.5 (C6), 121.9 (C7), 124.4 (C34), 126.0 (C8), 127.9 (C37), 130.2 (C33a), 131.0 (C37a), 131.8 (C5a), 132.2 (C35), 132.6 (C9a), 149.0 (C4), 152.8 (C32), 153.9 (C2), 154.2 (C10a), 157.0 (C31). MS (ESI)  $m/z$ : [(M+H)<sup>+</sup>, 344],

$[(M+Na)^+$ , 366] Anal. Calcd for  $C_{19}H_{13}N_5O_2$ : C, 66.47; H, 3.82; N, 20.40. Found: C, 66.91; H, 4.11; N, 20.19.

### 3.3. General Procedure for Preparation of 12g,h and 13g,h

A mixture of sodium metal (0.5 mmol) and dry ethanol (3 mL) was stirred for 5 min in order to form sodium ethoxide. Acetamidine hydrochloride (**8g**) or benzamidine hydrochloride (**8h**) (0.5 mmol) was then added. The mixture was kept under agitation for 5 min, then the  $\alpha$ -ketoester **5** or **6** (0.5 mmol) was added, and the reaction mixture was stirred at rt for 0.5 h. The ethanol was evaporated under reduced pressure and the resulting solid was washed with ethyl acetate ( $3 \times 1$  mL) followed by water ( $2 \times 1$  mL). The washing with water is required due to the formation of sodium chloride through the neutralization of the hydrogen chloride present in the starting amidine with the base sodium ethoxide.

#### ***N*-(1-Iminoethyl)-2-oxo-2-(4-oxo-4*H*-pyrido[1,2-*a*]pyrimidin-3-yl)acetamide (12g)**

Yield 67%, 137.06°C.  $^1H$  NMR (400 MHz, DMSO- $d_6$ ):  $\delta$  2.09 (s, 3H, H35), 7.37 (td, 1H,  $^1J_{HH} = 7.1$ ;  $^2J_{HH} = 0.7$ ; H8), 7.71 (ddd, 1H,  $^1J_{HH} = 8.9$ ;  $^2J_{HH} = 1.3$ ;  $^3J_{HH} = 0.7$ ; H6), 7.96 (ddd, 1H,  $^1J_{HH} = 8.9$ ;  $^2J_{HH} = 6.6$  Hz;  $^3J_{HH} = 1.6$ ; H7), 8.64 (s, 1H, H2), 8.89 (ddd, 1H,  $^1J_{HH} = 7.1$ ;  $^2J_{HH} = 1.5$ ;  $^3J_{HH} = 0.7$ ; H9).  $^{13}C$  NMR (100 MHz, DMSO- $d_6$ ):  $\delta$  16,51 (C35), 114,7 (C3), 116,7 (C8), 125,9 (C6), 126,6 (C9), 137,2 (C7), 148,3 (C4), 150,5 (C9a), 151,9 (C2), 154,7 (C32), 169,1 (C34), 184,8 (C31). MS (ESI)  $m/z$ :  $[(M+H)^+$ , 259],  $[(M+Na)^+$ , 281]. Anal. Calcd for  $C_{12}H_{10}N_4O_3$ : C, 55.81; H, 3.90; N, 21.70. Found: C, 55.56; H, 3.94; N, 21.47.

***N*-(Imino(phenyl)methyl)-2-oxo-2-(4-oxo-4*H*-pyrido[1,2-*a*]pyrimidin-3-yl)acetamide (12h)**

Yield 66%, m.p. 151.55°C. <sup>1</sup>H NMR (400 MHz, DMSO-*d*<sub>6</sub>): δ 7.37 (td, 1H, <sup>1</sup>*J*<sub>HH</sub> = 7.1; <sup>2</sup>*J*<sub>HH</sub> = 1.5; H8), 7.54 (t, 2H, Ph), 7.62 (t, 1H, Ph), 7.74 (d, 1H, <sup>1</sup>*J*<sub>HH</sub> = 9.0; H6), 7.96 (ddd, 1H, <sup>1</sup>*J*<sub>HH</sub> = 9.0; <sup>2</sup>*J*<sub>HH</sub> = 6.6; <sup>3</sup>*J*<sub>HH</sub> = 1.5; H7), 8.08 (d, 2H, Ph), 8.75 (s, 1H, H2), 8.86 (ddd, 1H, <sup>1</sup>*J*<sub>HH</sub> = 7.1; <sup>2</sup>*J*<sub>HH</sub> = 1.5; <sup>3</sup>*J*<sub>HH</sub> = 0.7; H9). <sup>13</sup>C NMR (100 MHz, DMSO-*d*<sub>6</sub>): δ 114,6 (C3), 116,9 (C8), 126,0 (C6), 126,7 (C9), 127,7 + 128,7 + 128,8 + 132,6 (Ph), 137,5 (C7), 150,7 (C4), 152,1 (C9a), 154,8 (C2), 161,9 (C32+C34), 183,5 (C31). MS (ESI) *m/z*: [(M+H)<sup>+</sup>, 321], [(M+Na)<sup>+</sup>, 343]. Anal. Calcd for C<sub>17</sub>H<sub>12</sub>N<sub>4</sub>O<sub>3</sub>: C, 63.75; H, 3.78; N, 17.49. Found: C, 63.66; H, 4.03; N, 17.21.

***N*-(1-Iminoethyl)-2-oxo-2-(5-oxo-5*H*-thiazolo[3,2-*a*]pyrimidin-6-yl)acetamide (13g)**

Yield 69%, Decomposition Temperature . 162,43°C <sup>1</sup>H NMR (400 MHz, DMSO-*d*<sub>6</sub>): δ 2.07 (s, 3H, H35), 7.60 (d, 1H, <sup>1</sup>*J*<sub>HH</sub> = 4.9; H7), 7.97 (d, 1H, <sup>1</sup>*J*<sub>HH</sub> = 4.9; H6), 8,34 (s, 1H, H2). <sup>13</sup>C NMR (100 MHz, DMSO-*d*<sub>6</sub>): δ 16.17 (C35), 116.0 (C7), 119.2 (C3), 121.3 (C6), 150.4 (C2), 155.3 (C4 + C32), 162.7 (C8a + C34), 183.7 (C31). MS (ESI) *m/z*: [(M+H)<sup>+</sup>, 265], [(M+Na)<sup>+</sup>, 287]. Anal. Calcd for C<sub>10</sub>H<sub>8</sub>N<sub>4</sub>O<sub>3</sub>S: C, 45.45; H, 3.05; N, 21.20. Found: C, 45.15; H, 2.88; N, 21.31.

***N*-(Imino(phenyl)methyl)-2-oxo-2-(5-oxo-5*H*-thiazolo[3,2-*a*]pyrimidin-6-yl)acetamide (13h)**

Yield 51%, Decomposition Temperature . 208,11°C <sup>1</sup>H NMR (400 MHz, DMSO-*d*<sub>6</sub>): δ 7.55 (t, 2H, Ph), 7.66-7.62 (m, 2H, H7 + Ph), 7.96 (d, 1H, <sup>1</sup>*J*<sub>HH</sub> = 4.4; H6),

8.06 (d, 2H, Ph), 8.46 (s, 1H, H2).  $^{13}\text{C}$  NMR (100 MHz,  $\text{DMSO-}d_6$ ):  $\delta$  114.3 (C7), 116.1 (C3), 121.4 (C6), 127.4 + 128.5 + 132.2 (Ph), 150.5 (C2), 155.4 (C4 + C32), 162.8 (C8a + C34), 182.4 (C31). MS (ESI)  $m/z$ : [(M+H) $^+$ , 326], [(M+Na) $^+$ , 349]. Anal. Calcd for  $\text{C}_{15}\text{H}_{10}\text{N}_4\text{O}_3\text{S}$ : C, 55.21; H, 3.09; N, 17.17. Found: C, 55.59; H, 2.92; N, 16.95.

#### 4. $^1\text{H}$ and $^{13}\text{C}$ NMR spectra

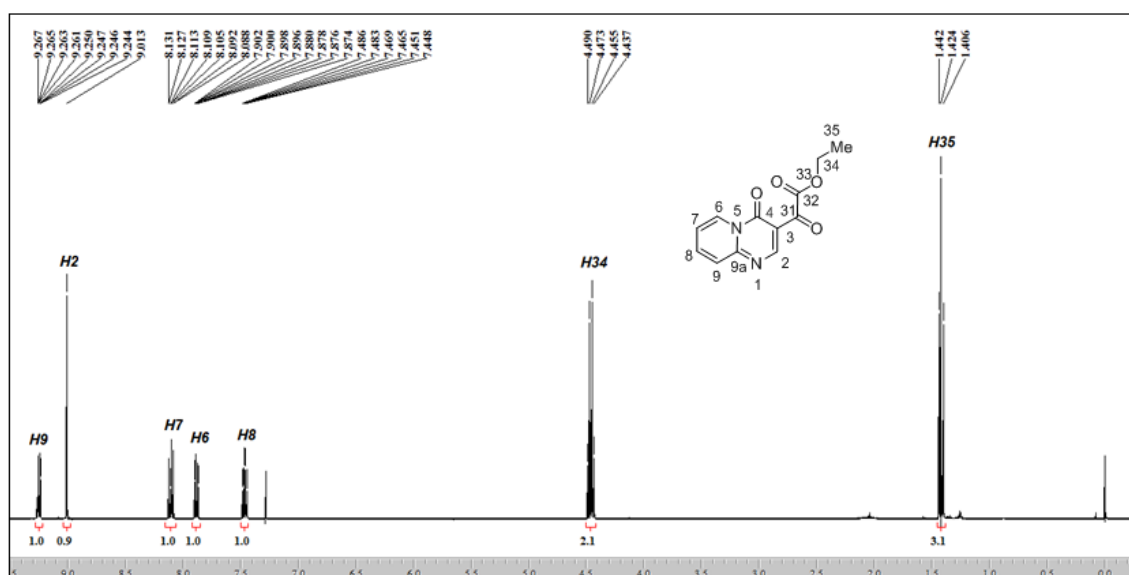

$^1\text{H}$  NMR spectrum of compound **5** in  $\text{CDCl}_3$  at  $25\text{ }^\circ\text{C}$ .

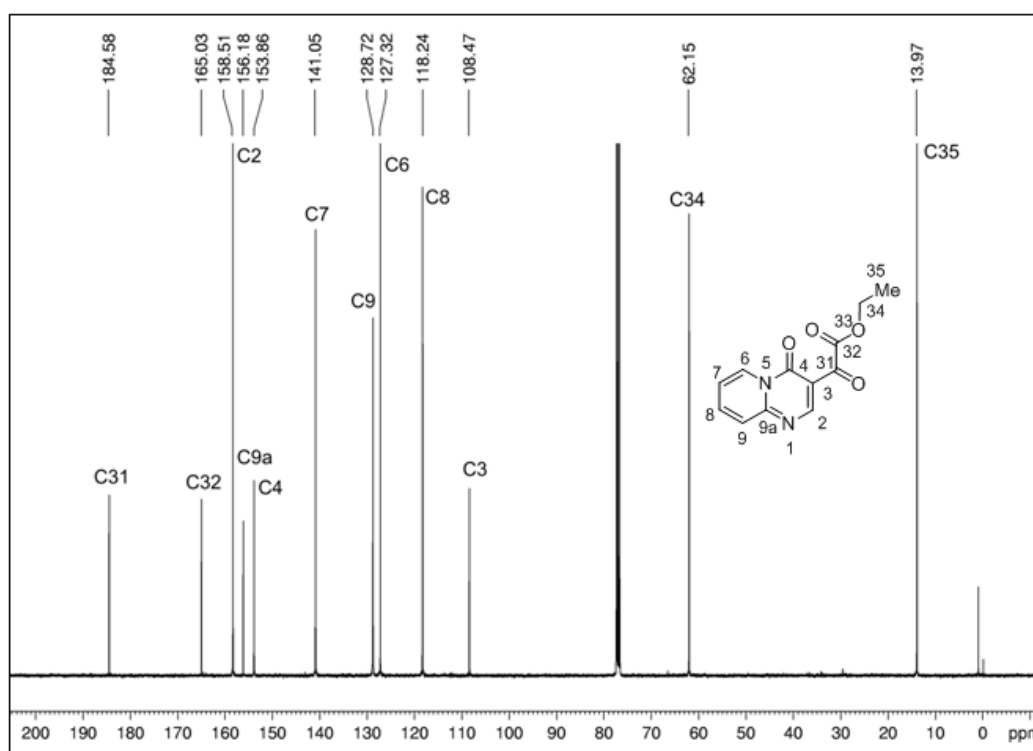

$^{13}\text{C}$  NMR spectrum of compound **5** in  $\text{CDCl}_3$  at  $25\text{ }^\circ\text{C}$ .

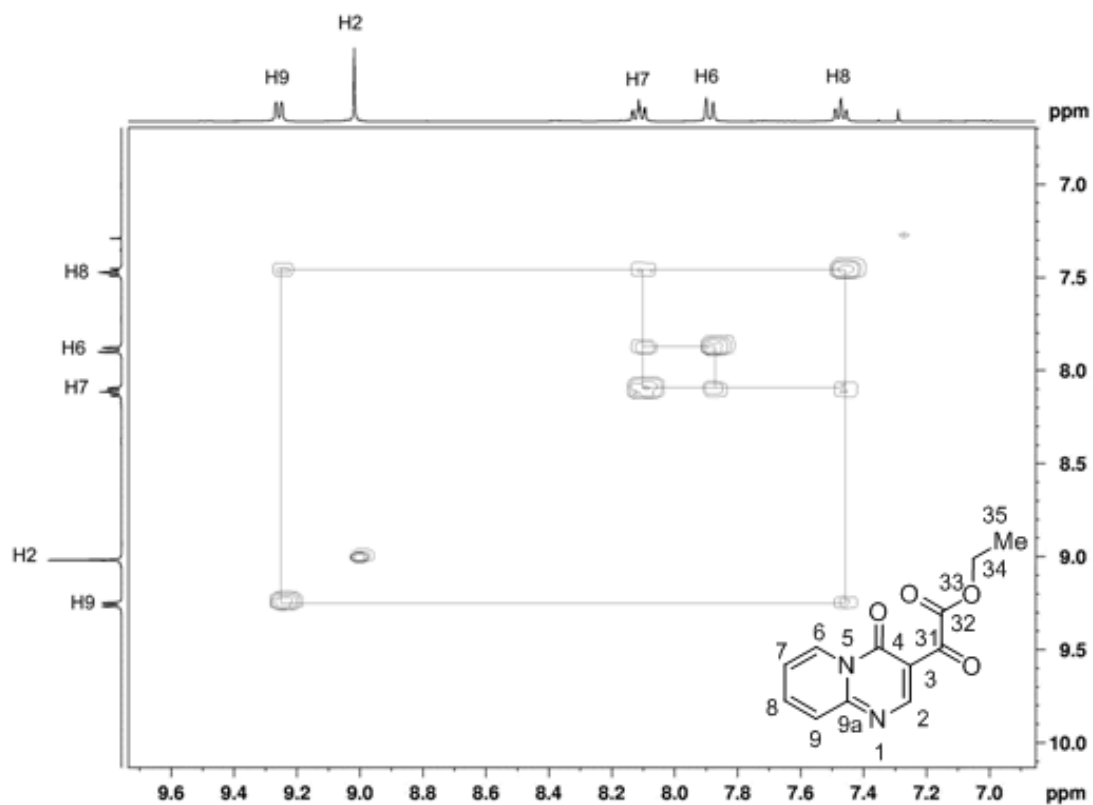

COSY spectrum of compound **5** in CDCl<sub>3</sub> at 25 °C.

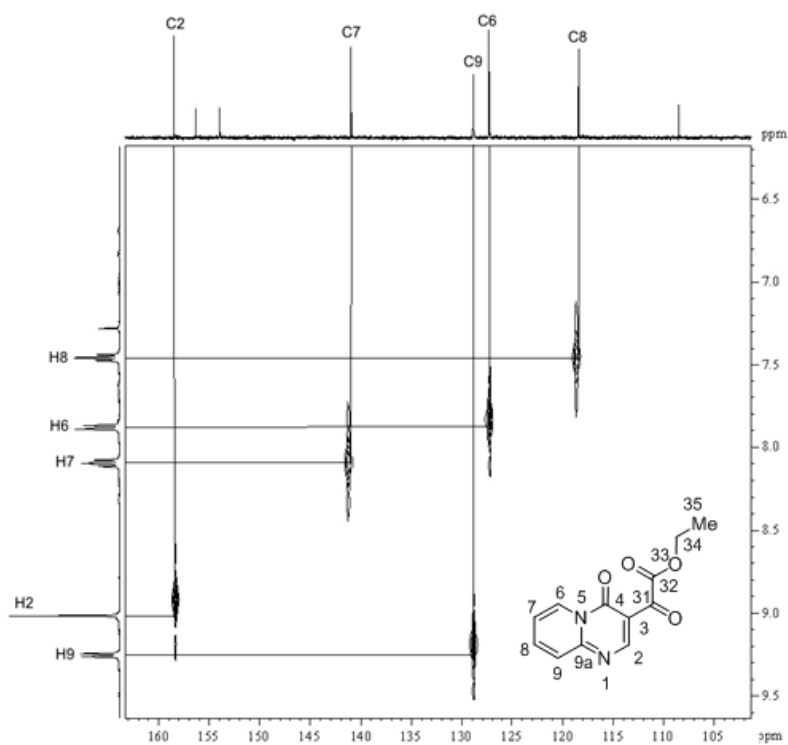

HETCOR spectrum of compound **5** in CDCl<sub>3</sub> at 25 °C.



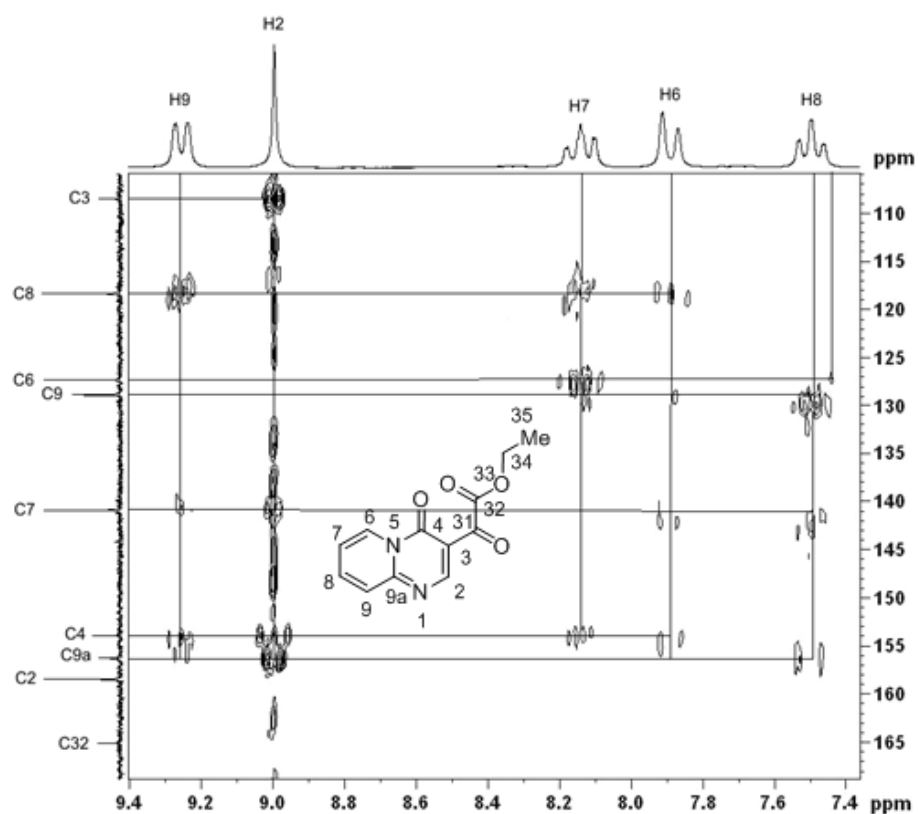

HMBC spectrum of compound **5** in CDCl<sub>3</sub> at 25 °C.

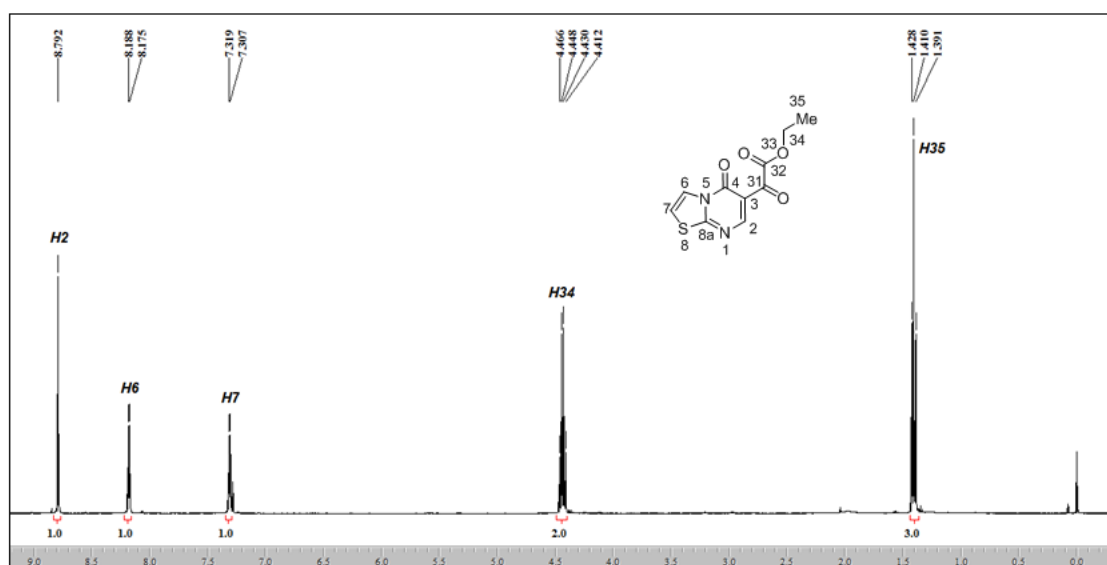

<sup>1</sup>H NMR spectrum of compound **6** in CDCl<sub>3</sub> at 25 °C.

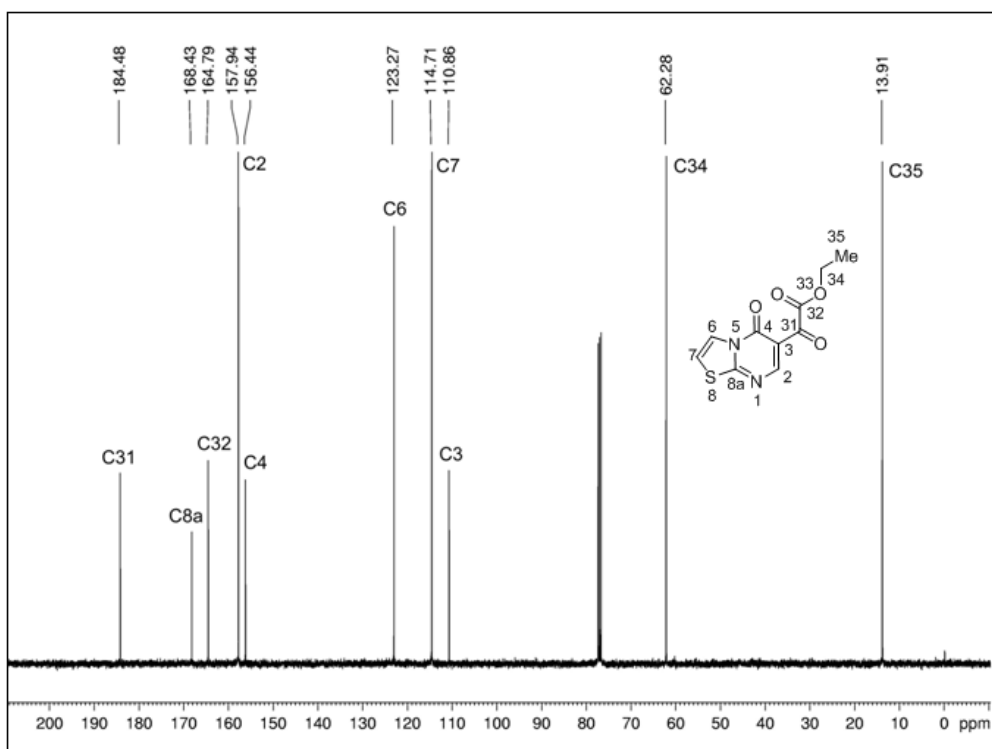

<sup>13</sup>C NMR spectrum of compound **6** in CDCl<sub>3</sub> at 25 °C.

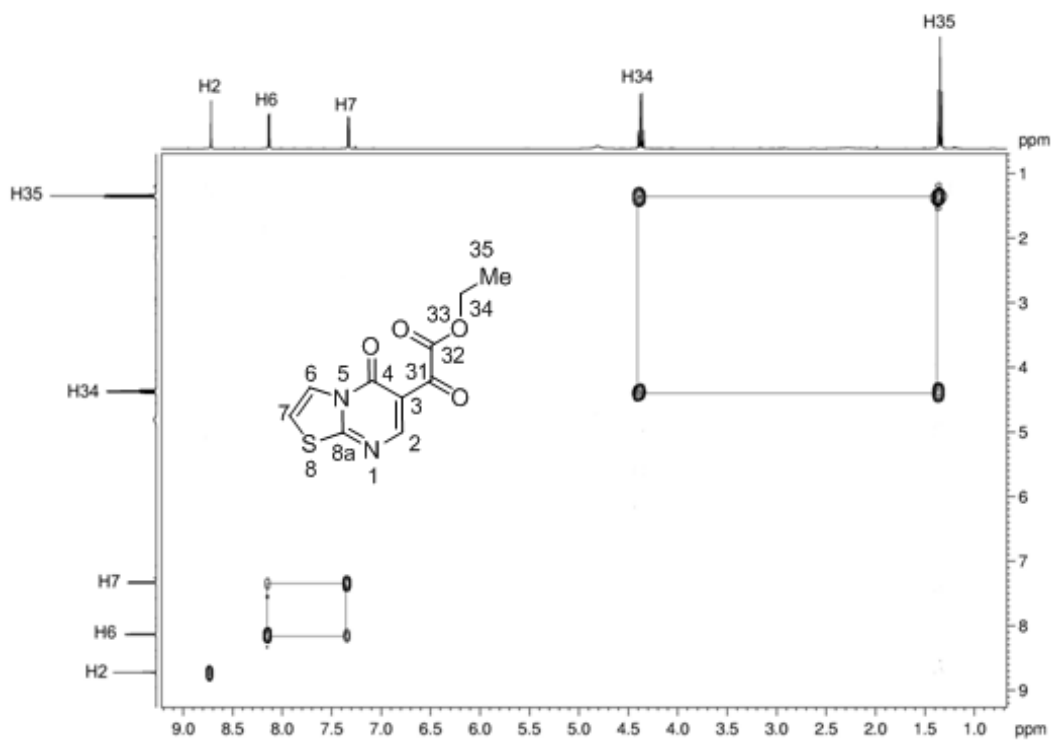

COSY spectrum of compound **6** in CDCl<sub>3</sub> at 25 °C.

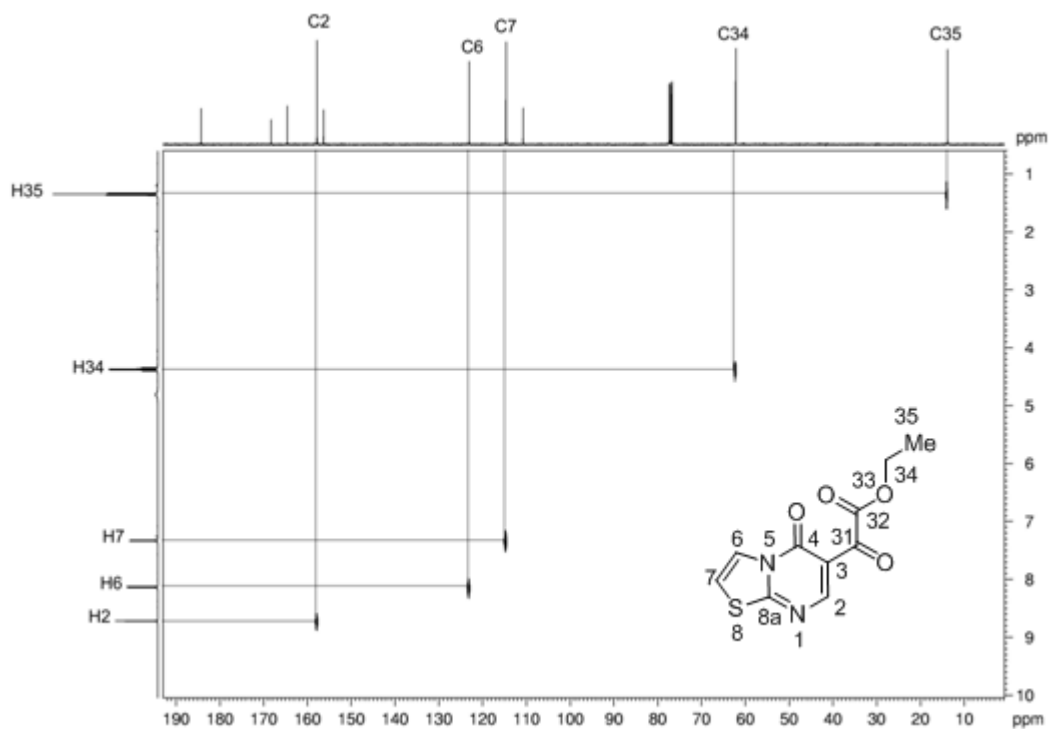

HETCOR spectrum of compound **6** in CDCl<sub>3</sub> at 25 °C.

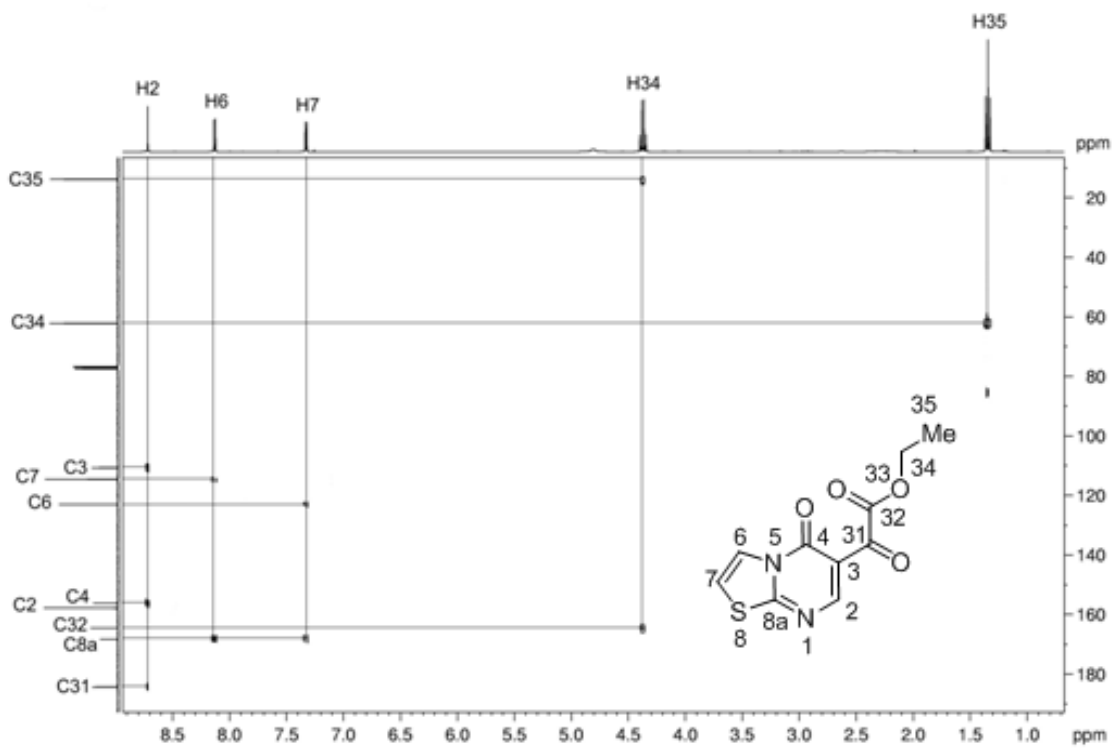

HMBC spectrum of compound **6** in CDCl<sub>3</sub> at 25 °C.

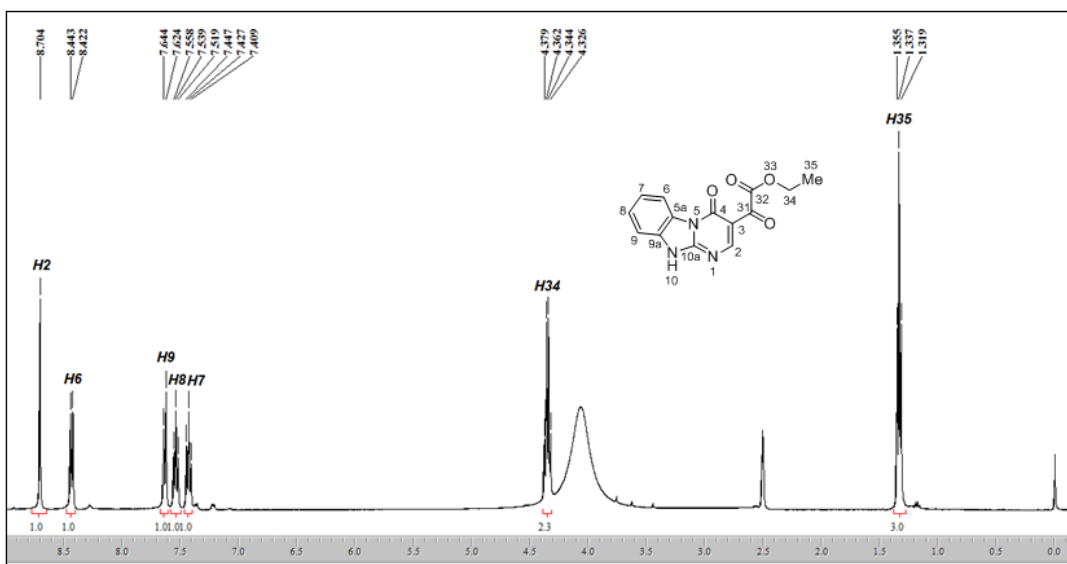

<sup>1</sup>H NMR spectrum of compound **7** in DMSO-*d*<sub>6</sub> at 25 °C.

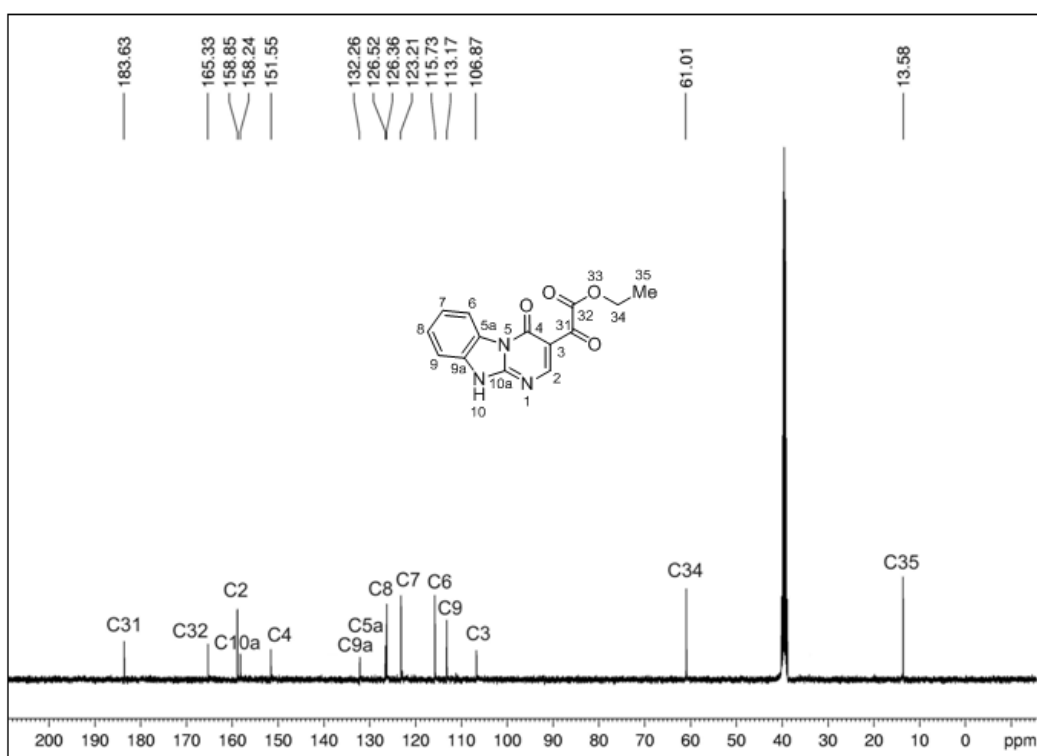

<sup>13</sup>C NMR spectrum of compound **7** in DMSO-*d*<sub>6</sub> at 25 °C.

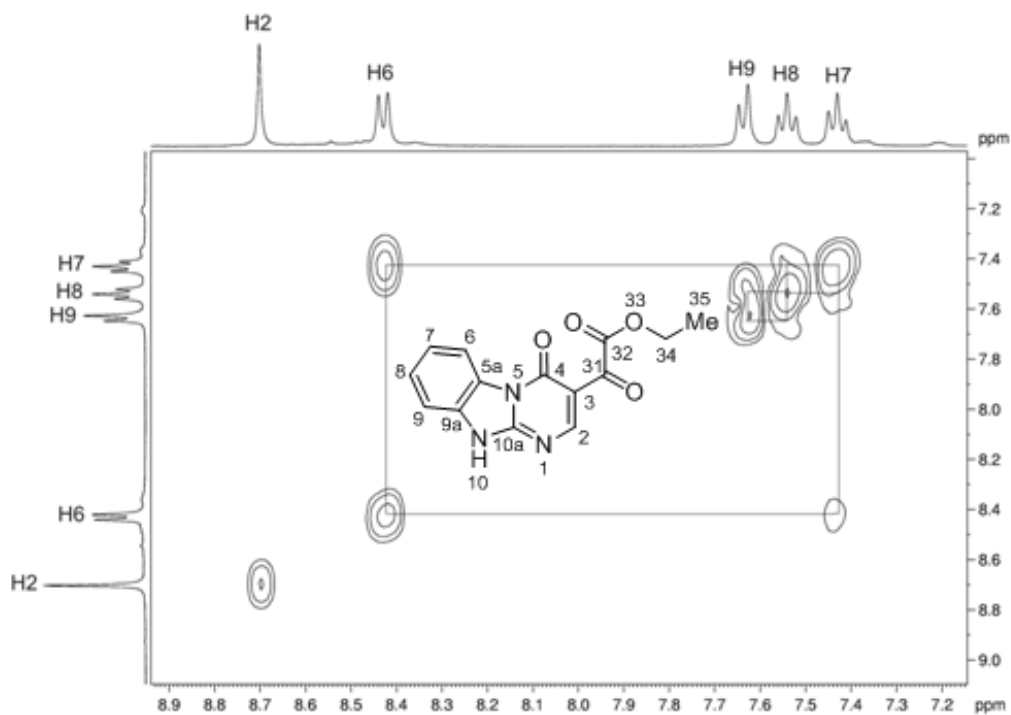

COSY spectrum of compound **7** in DMSO-*d*<sub>6</sub> at 25 °C.

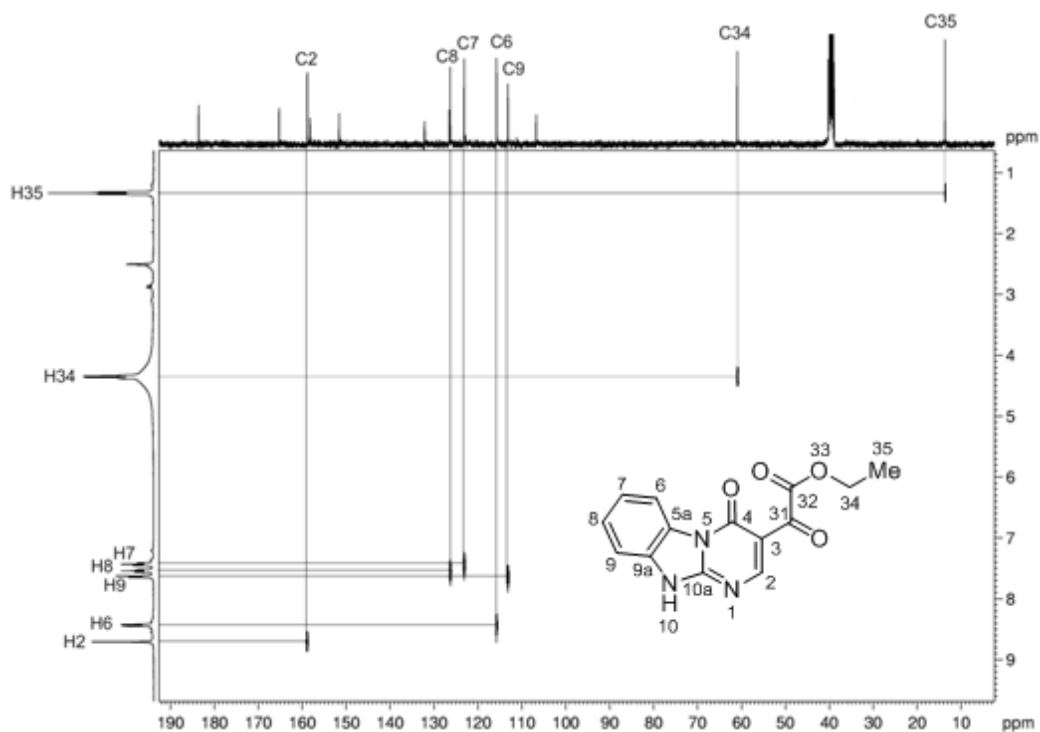

HETCOR spectrum of compound **7** in DMSO-*d*<sub>6</sub> at 25 °C.

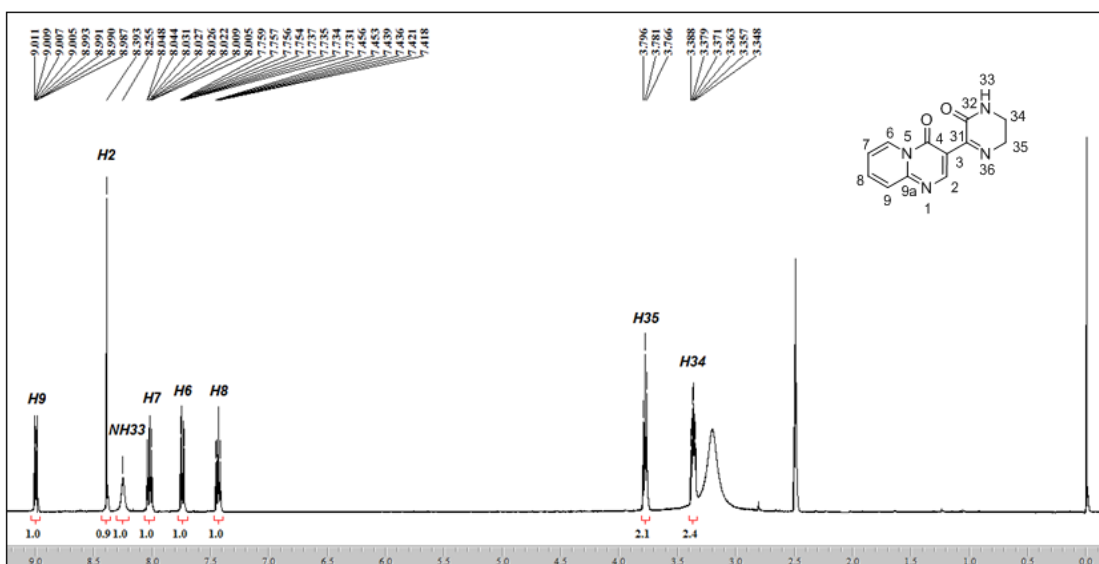

<sup>1</sup>H NMR spectrum of compound **9a** in DMSO-*d*<sub>6</sub> at 25 °C.

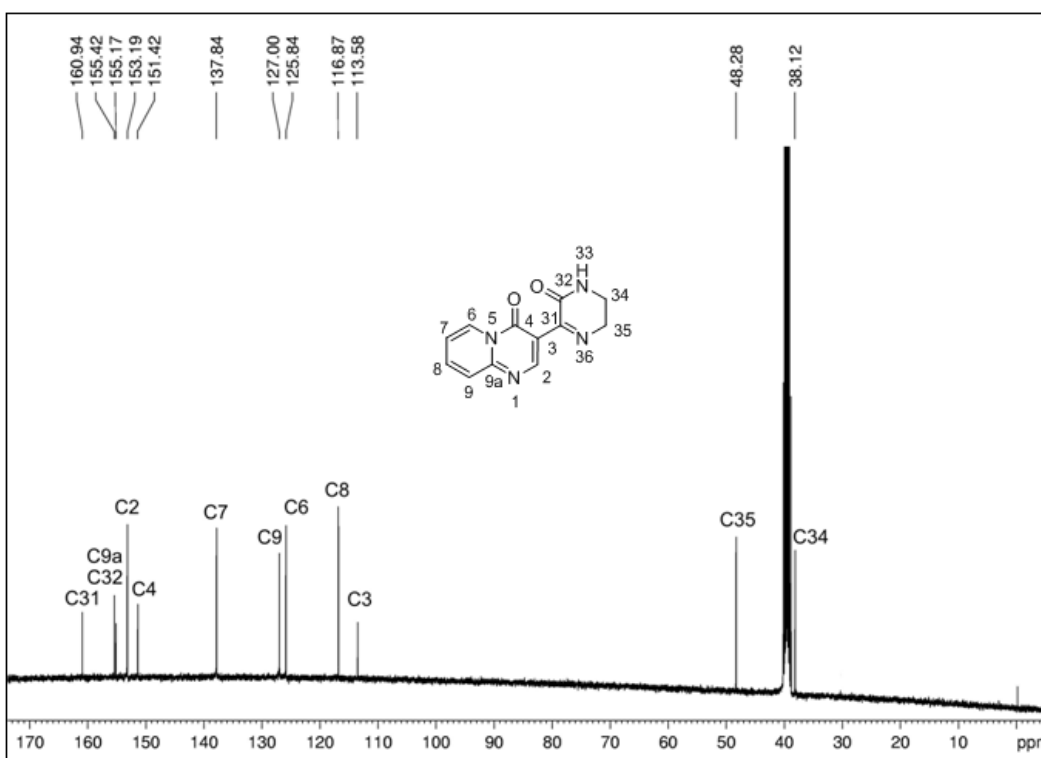

<sup>13</sup>C NMR spectrum of compound **9a** in DMSO-*d*<sub>6</sub> at 25 °C.

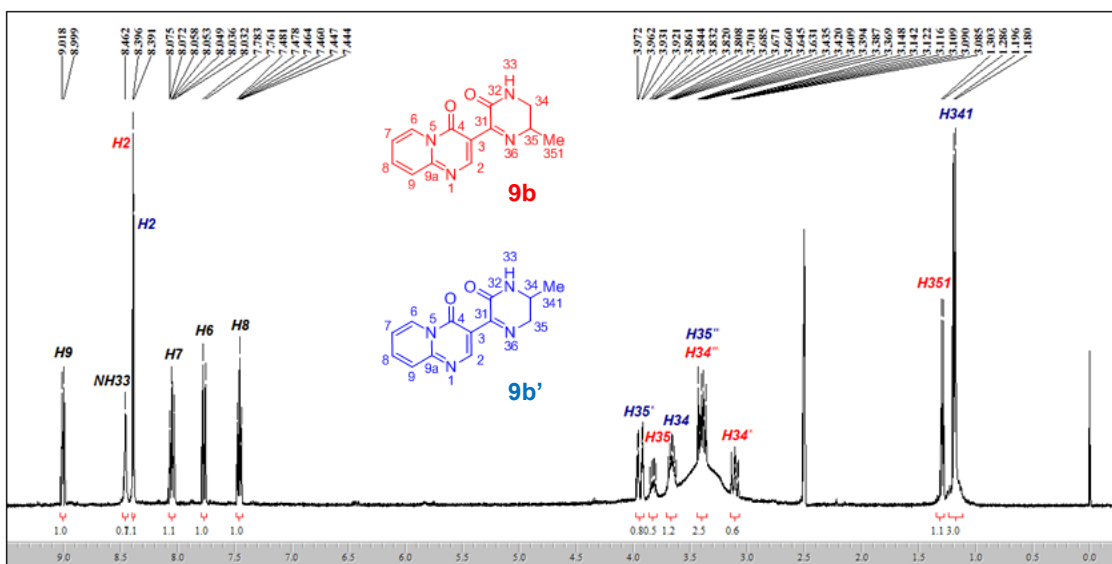

<sup>1</sup>H NMR spectrum of compound 9b and 9b' in DMSO-d<sub>6</sub> at 25 °C.

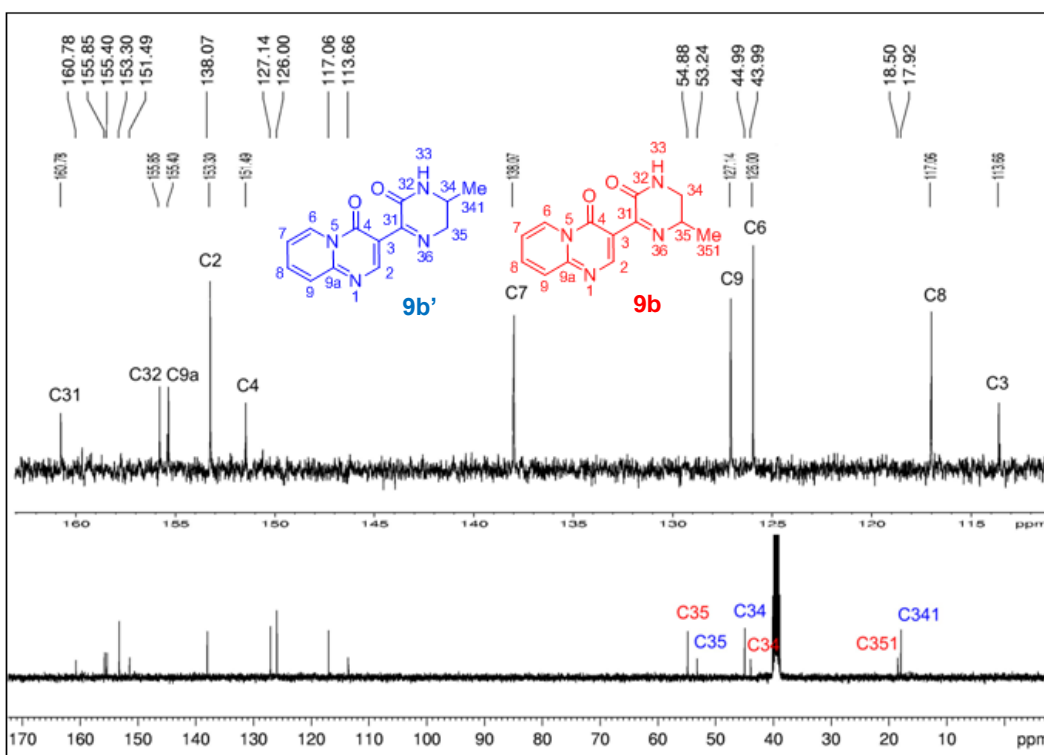

<sup>13</sup>C NMR spectrum of compound 9b and 9b' in DMSO-d<sub>6</sub> at 25 °C.

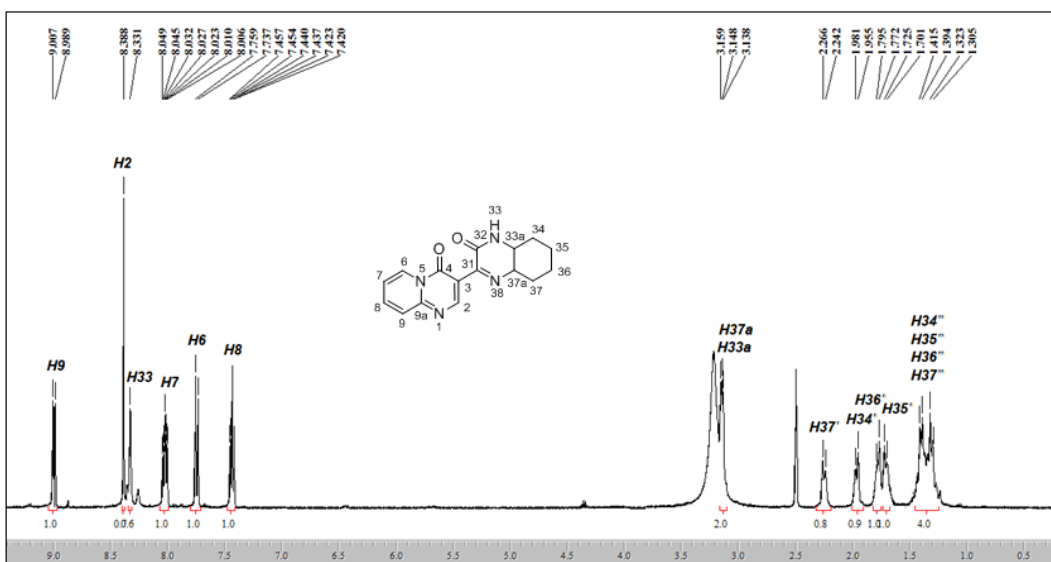

<sup>1</sup>H NMR spectrum of compound **9c** in DMSO-*d*<sub>6</sub> at 25 °C.

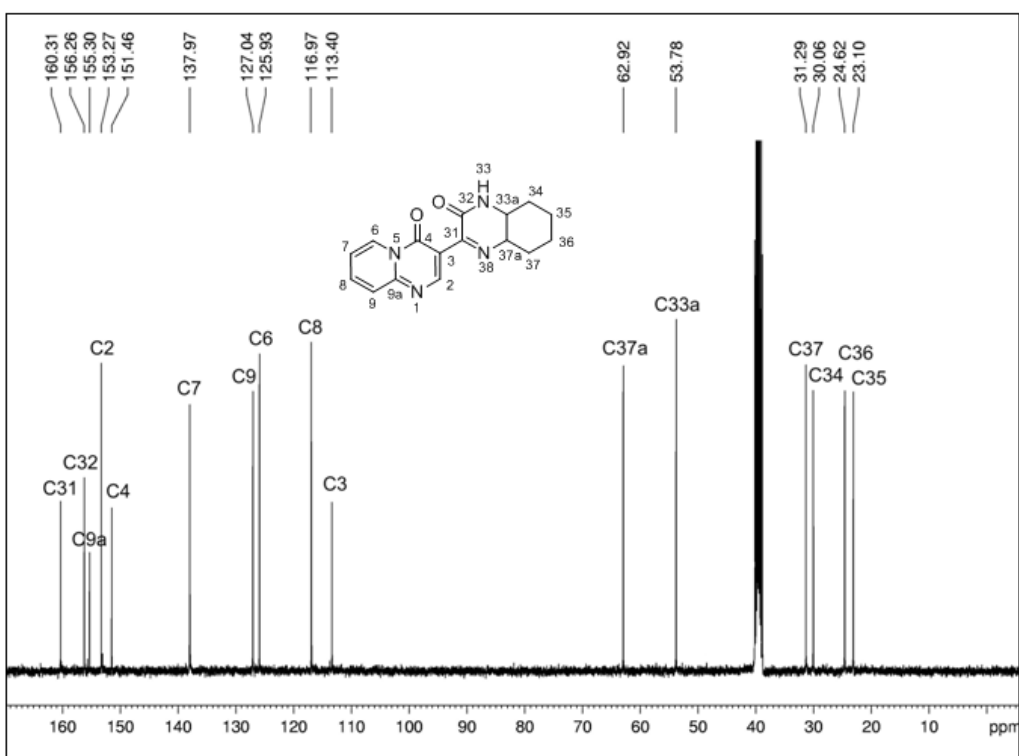

<sup>13</sup>C NMR spectrum of compound **9c** in DMSO-*d*<sub>6</sub> at 25 °C.



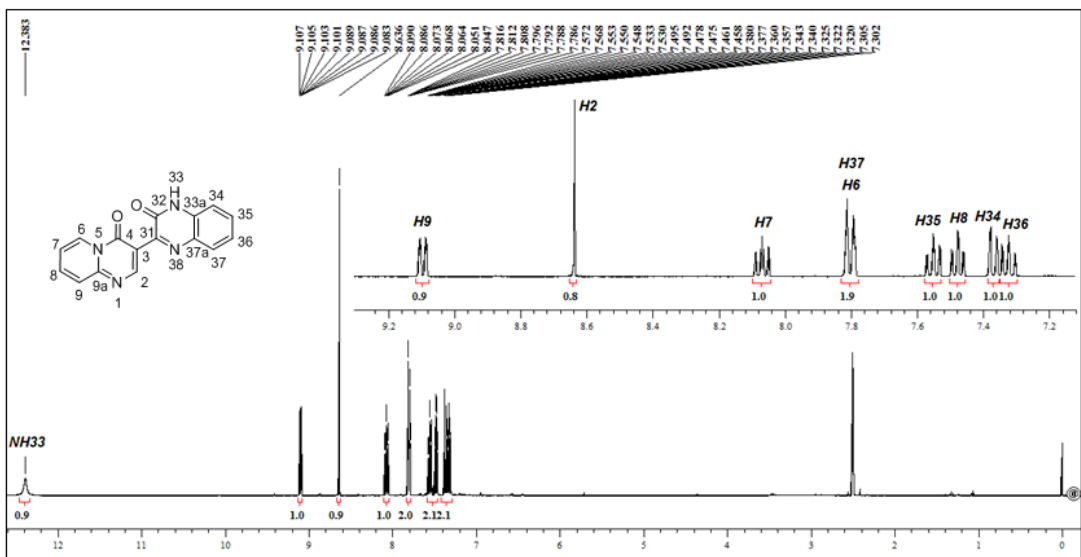

<sup>1</sup>H NMR spectrum of compound **9d** in DMSO-*d*<sub>6</sub> at 25 °C.

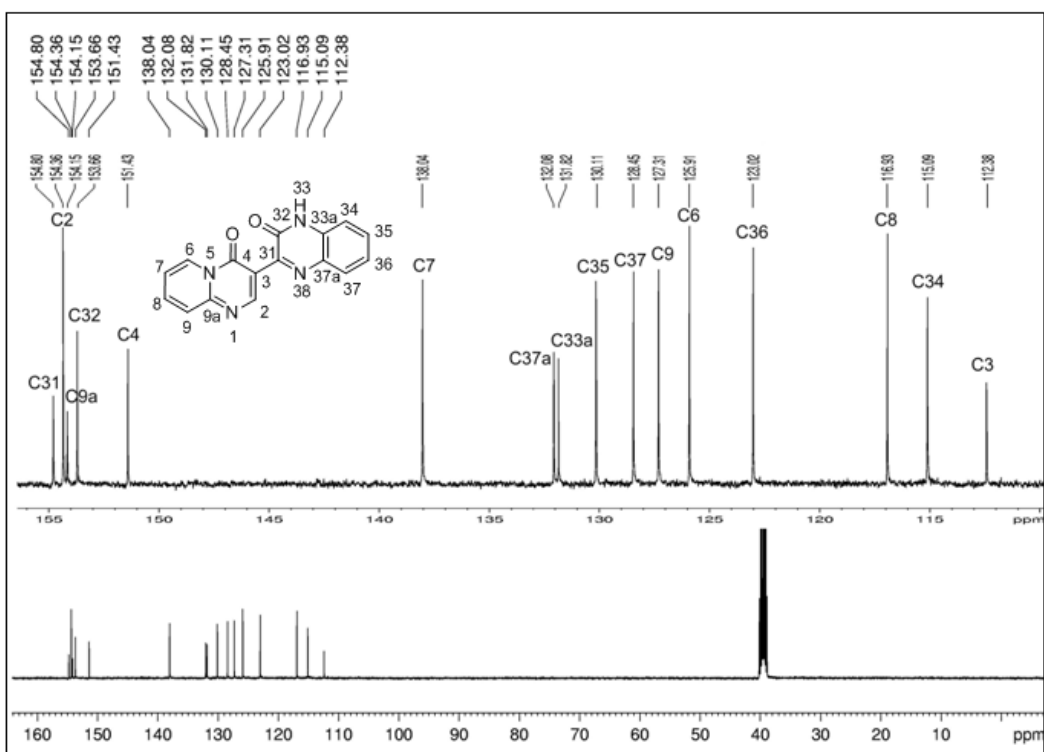

NMR

<sup>13</sup>C NMR spectrum of compound **9d** in DMSO-*d*<sub>6</sub> at 25 °C.

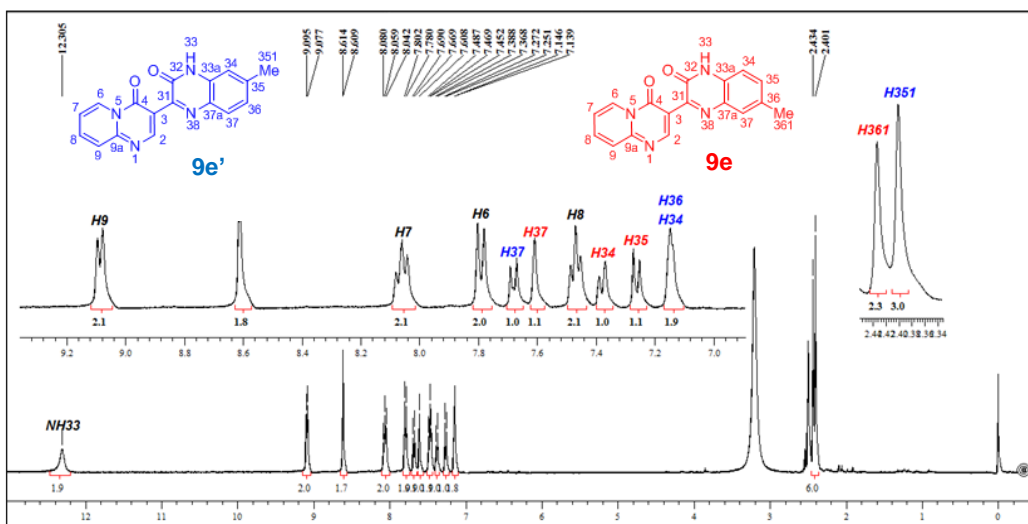

$^1\text{H}$  NMR spectrum of compound **9e** and **9e'** in  $\text{DMSO-}d_6$  at  $25\text{ }^\circ\text{C}$ .

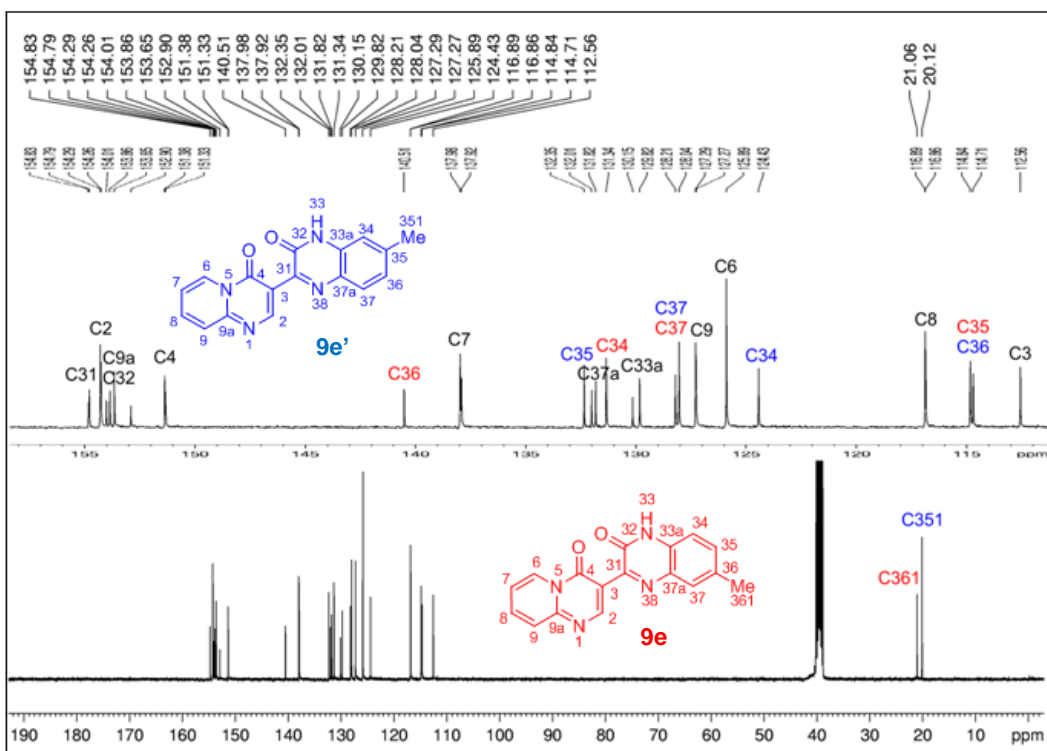

$^{13}\text{C}$  NMR spectrum of compound **9e** and **9e'** in  $\text{DMSO-}d_6$  at  $25\text{ }^\circ\text{C}$ .

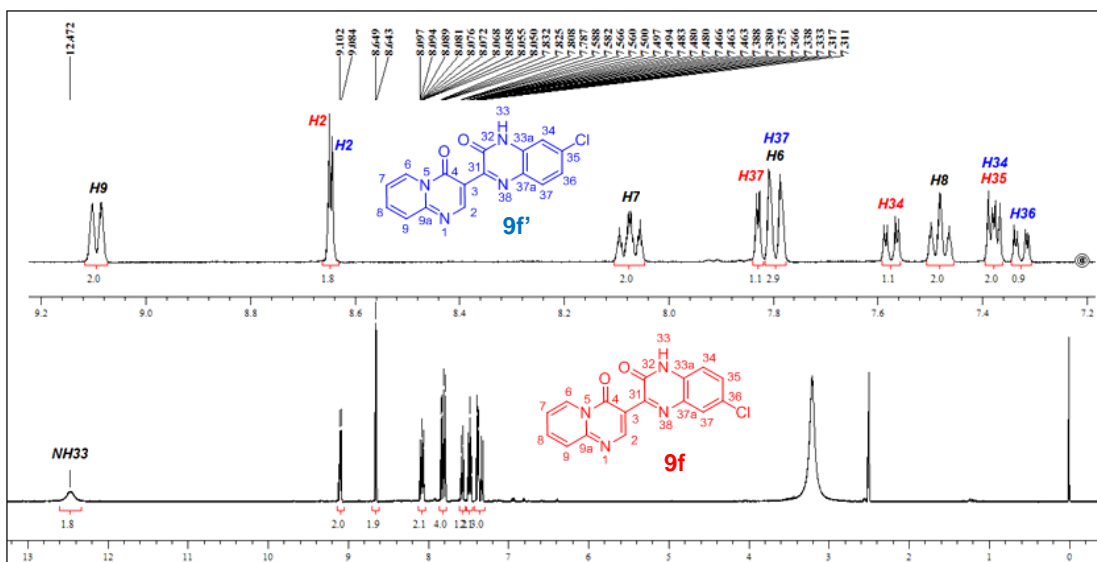

<sup>1</sup>H NMR spectrum of compound **9f** and **9f'** in DMSO-*d*<sub>6</sub> at 25 °C.

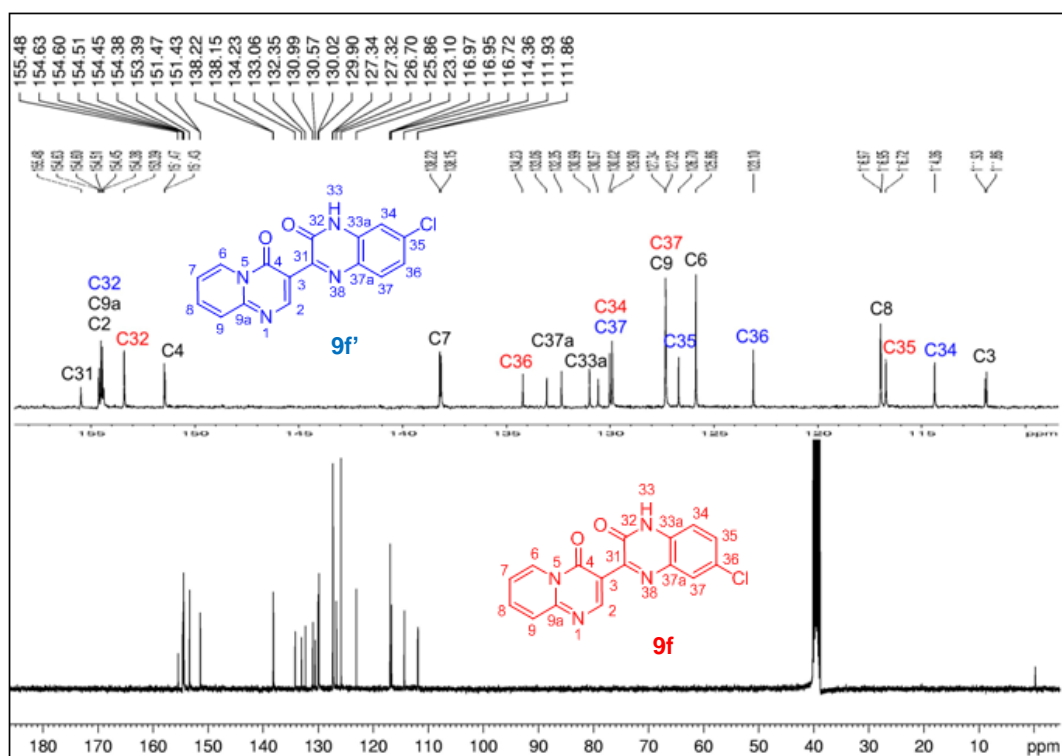

<sup>13</sup>C NMR spectrum of compound **9f** and **9f'** in DMSO-*d*<sub>6</sub> at 25 °C.

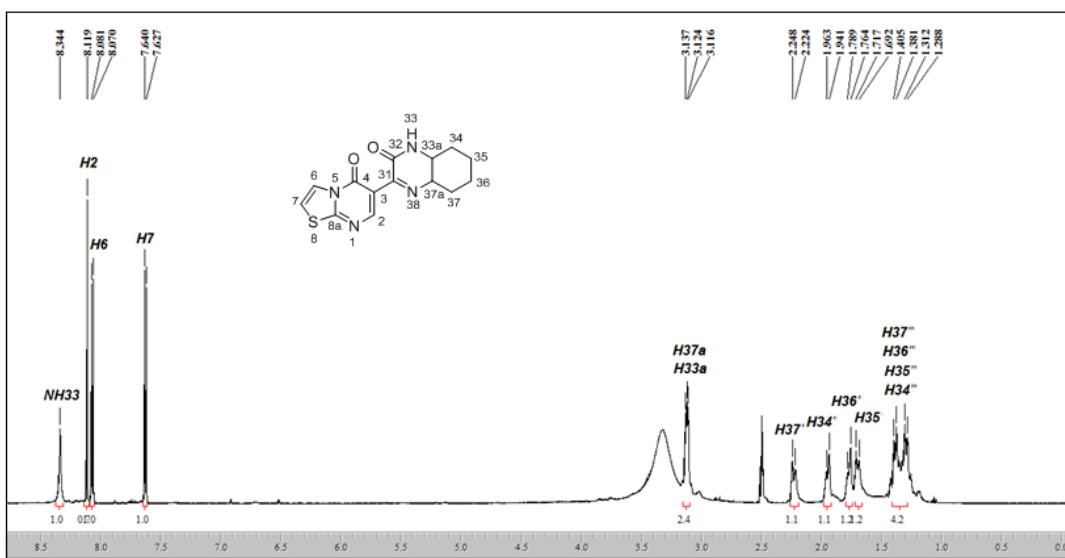

<sup>1</sup>H NMR spectrum of compound **10c** in DMSO-*d*<sub>6</sub> at 25 °C.

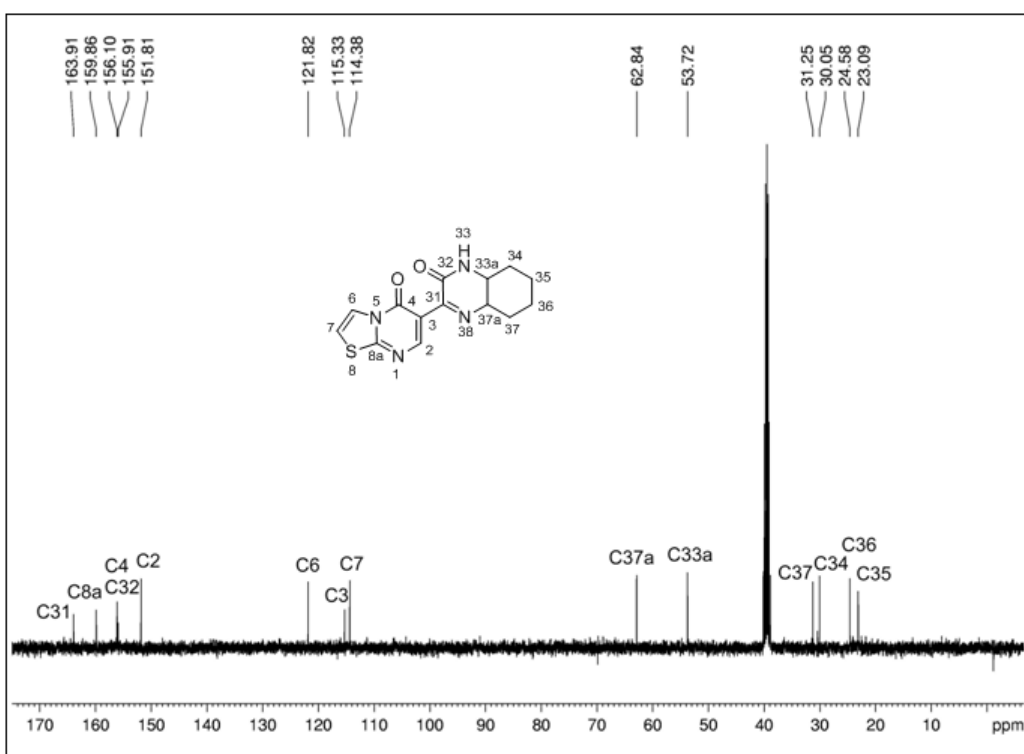

<sup>13</sup>C NMR spectrum of compound **10c** in DMSO-*d*<sub>6</sub> at 25 °C.

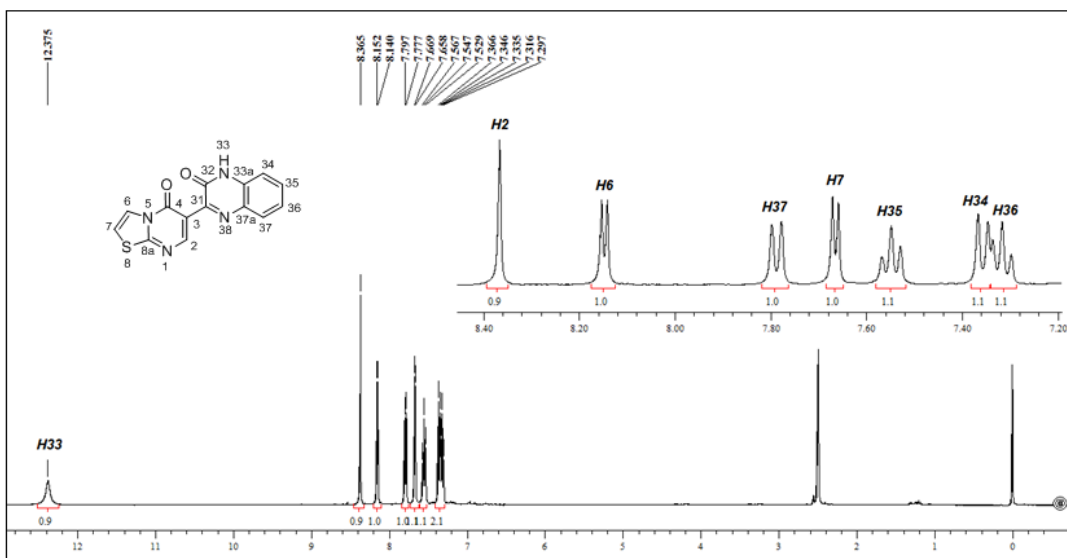

<sup>1</sup>H NMR spectrum of compound **10d** in DMSO-*d*<sub>6</sub> at 25 °C.

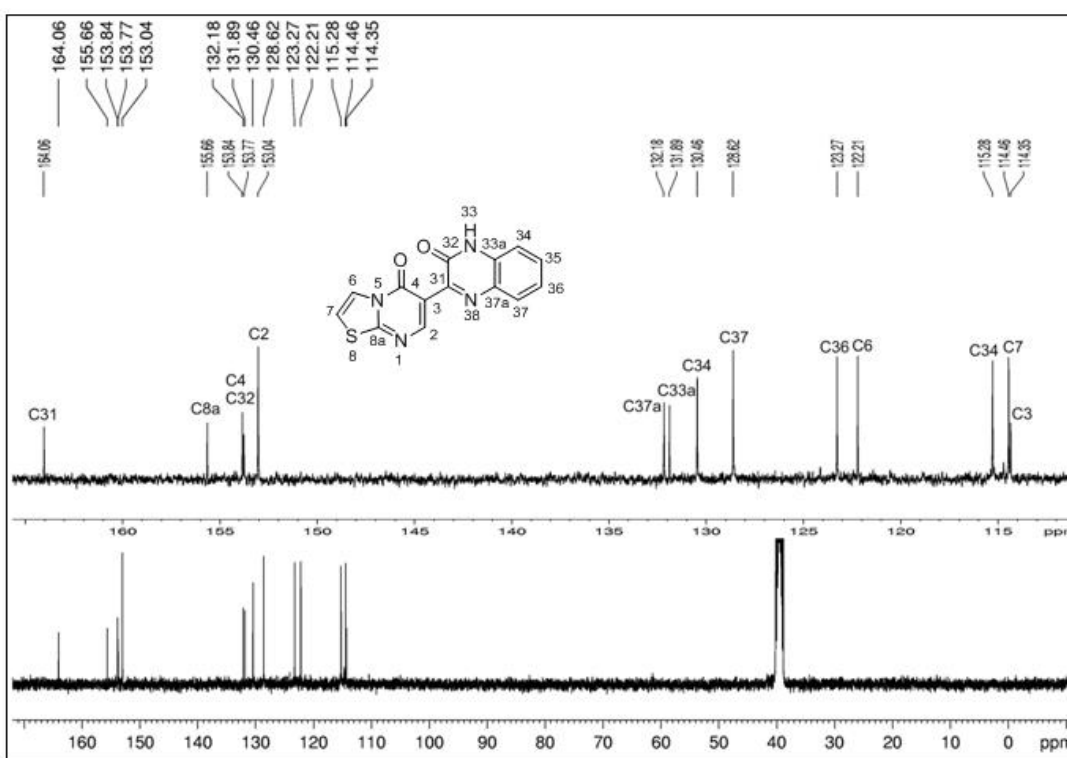

<sup>13</sup>C NMR spectrum of compound **10d** in DMSO-*d*<sub>6</sub> at 25 °C.

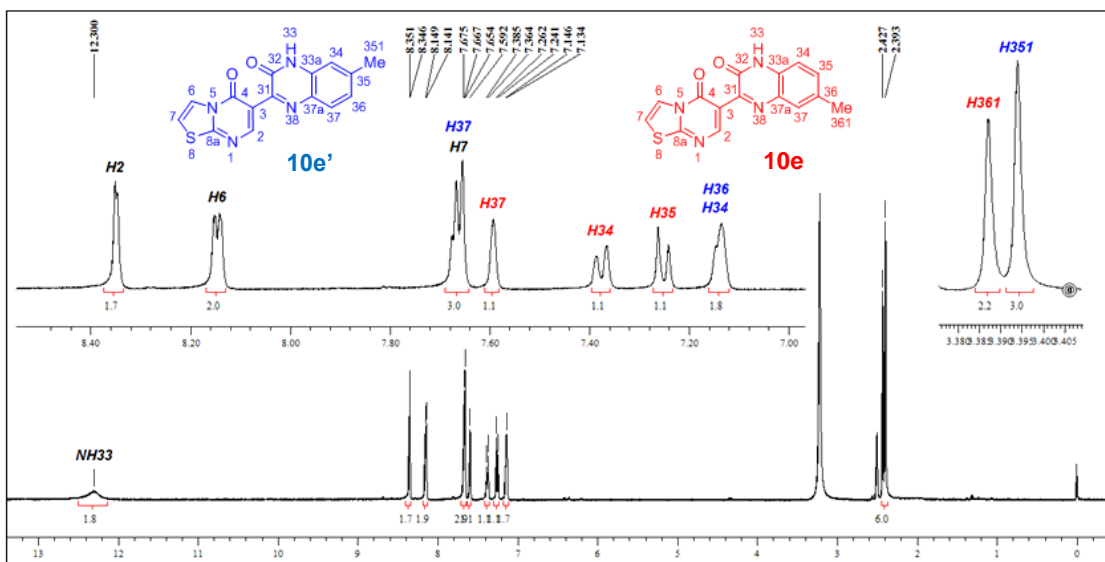

$^1\text{H}$  NMR spectrum of compound **10e** and **10e'** in  $\text{DMSO-}d_6$  at  $25\text{ }^\circ\text{C}$ .

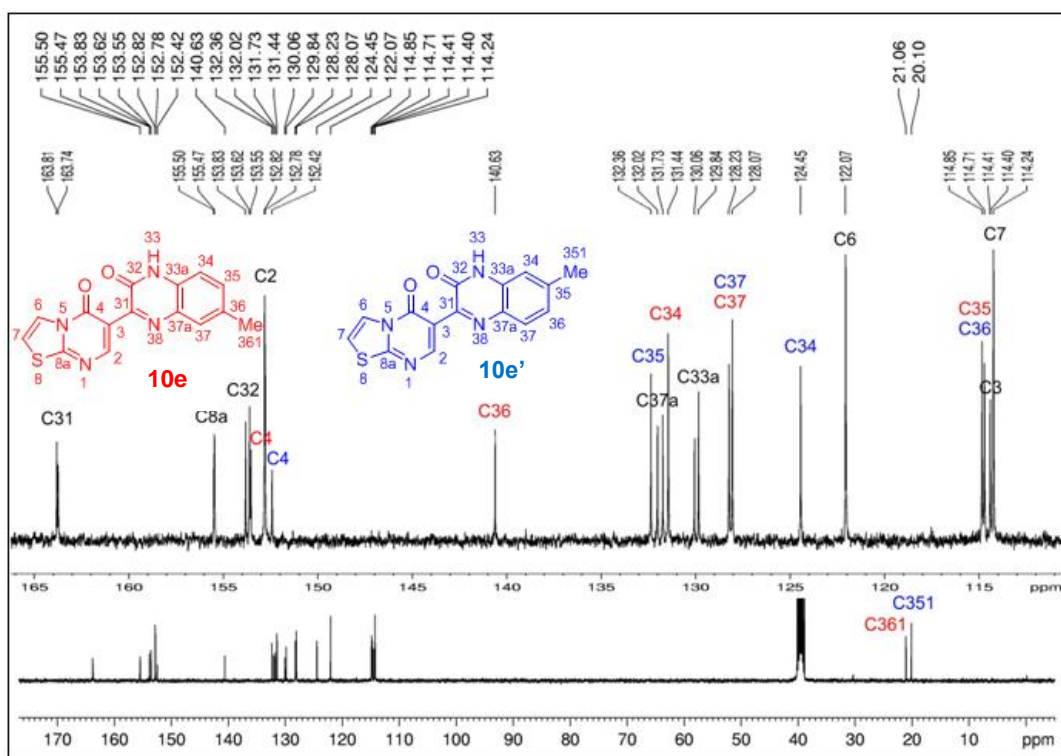

$^{13}\text{C}$  NMR spectrum of compound **10e** and **10e'** in  $\text{DMSO-}d_6$  at  $25\text{ }^\circ\text{C}$ .

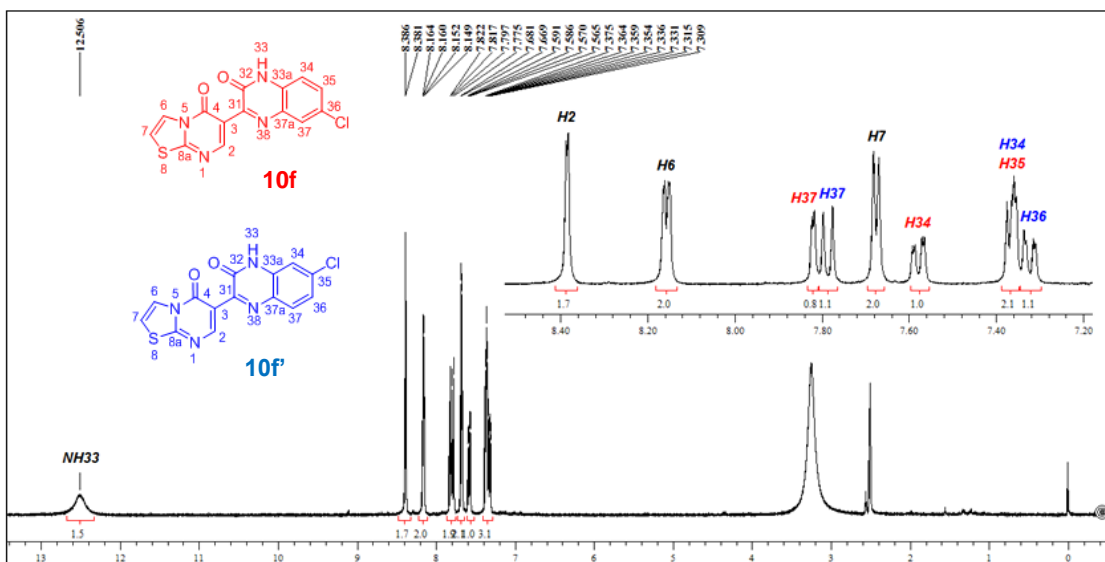

<sup>1</sup>H NMR spectrum of compound 10f and 10f' in DMSO-*d*<sub>6</sub> at 25 °C.

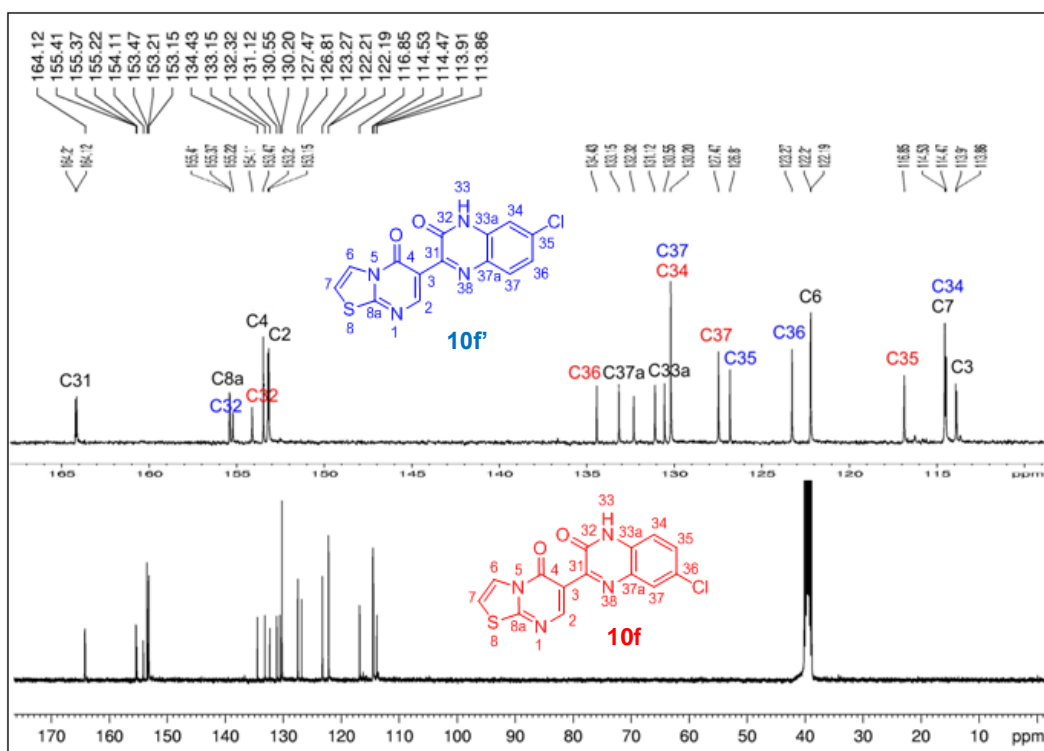

<sup>13</sup>C NMR spectrum of compound 10f and 10f' in DMSO-*d*<sub>6</sub> at 25 °C.

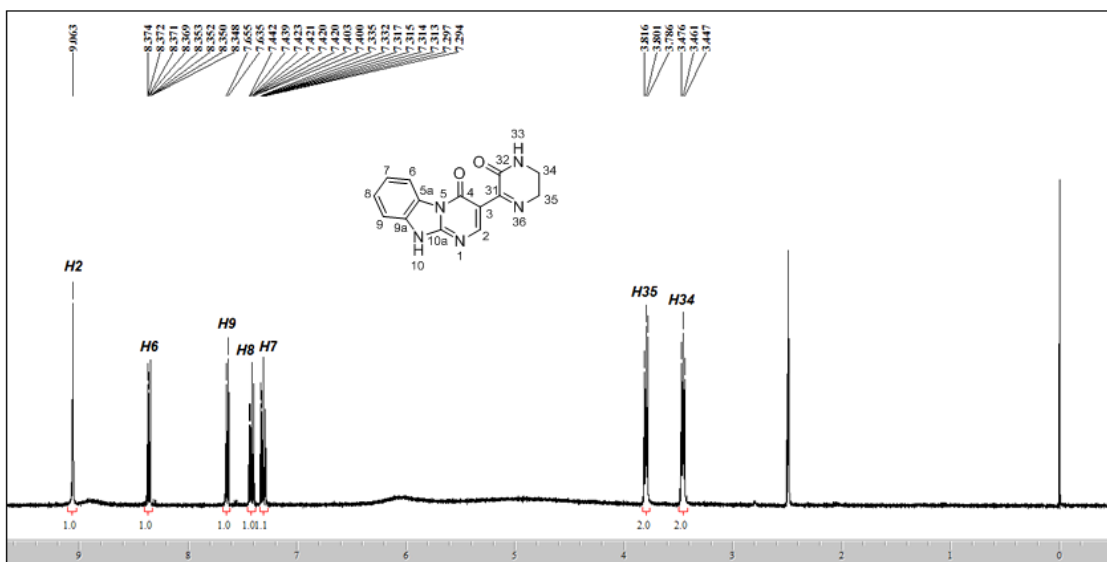

<sup>1</sup>H NMR spectrum of compound **11a** in DMSO-*d*<sub>6</sub> at 25 °C.

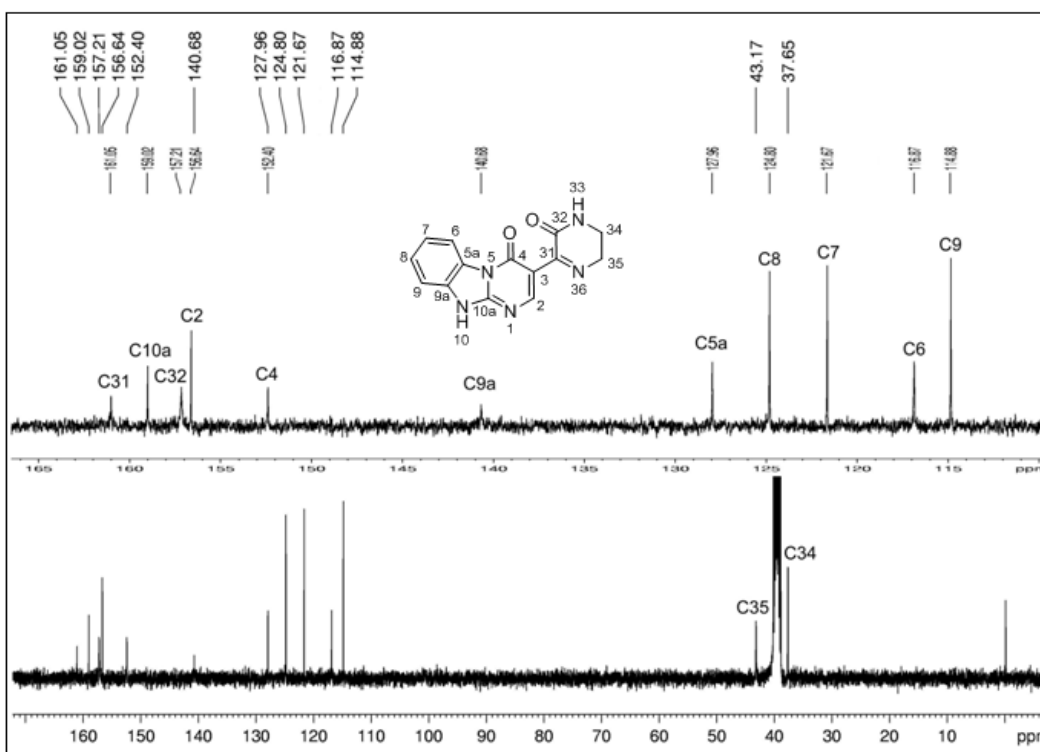

<sup>13</sup>C NMR spectrum of compound **11a** in DMSO-*d*<sub>6</sub> at 25 °C.



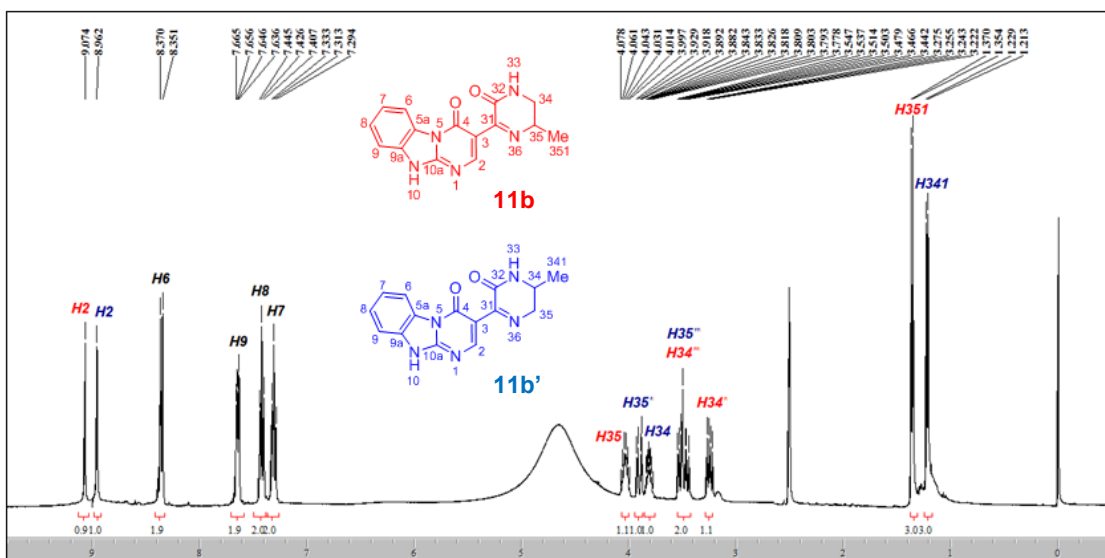

<sup>1</sup>H NMR spectrum of compound **11b** and **11b'** in DMSO-d<sub>6</sub> at 25 °C.

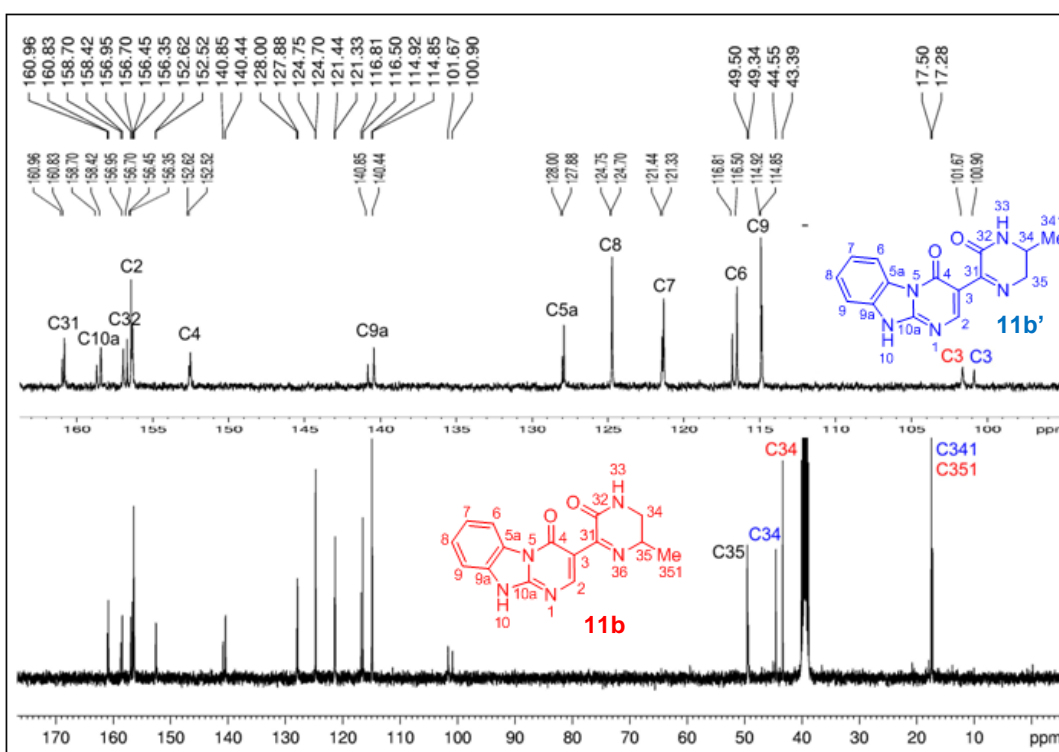

<sup>13</sup>C NMR spectrum of compound **11b** and **11b'** in DMSO-d<sub>6</sub> at 25 °C.

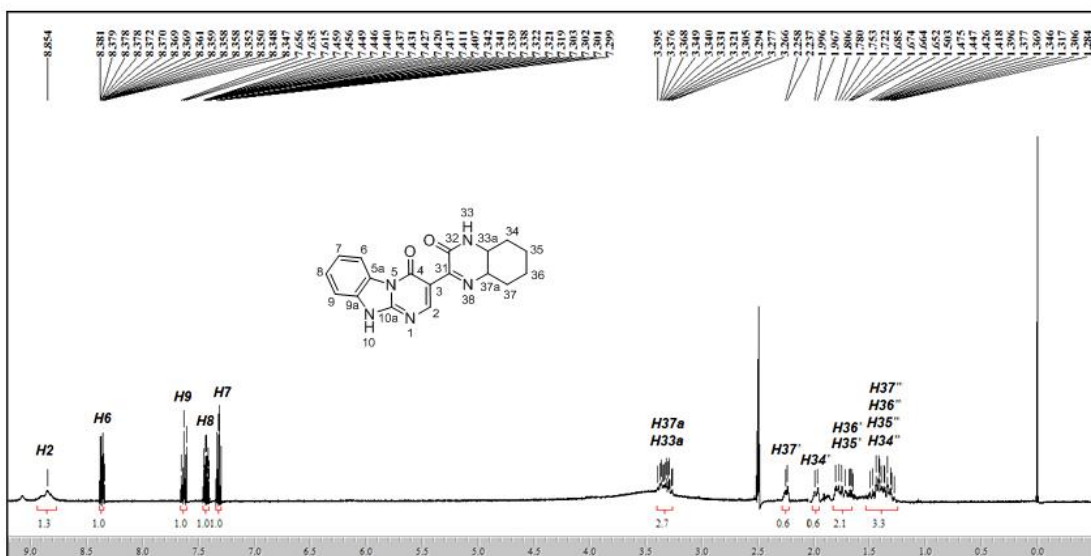

<sup>1</sup>H NMR spectrum of compound **11c** in DMSO-*d*<sub>6</sub> at 25 °C.

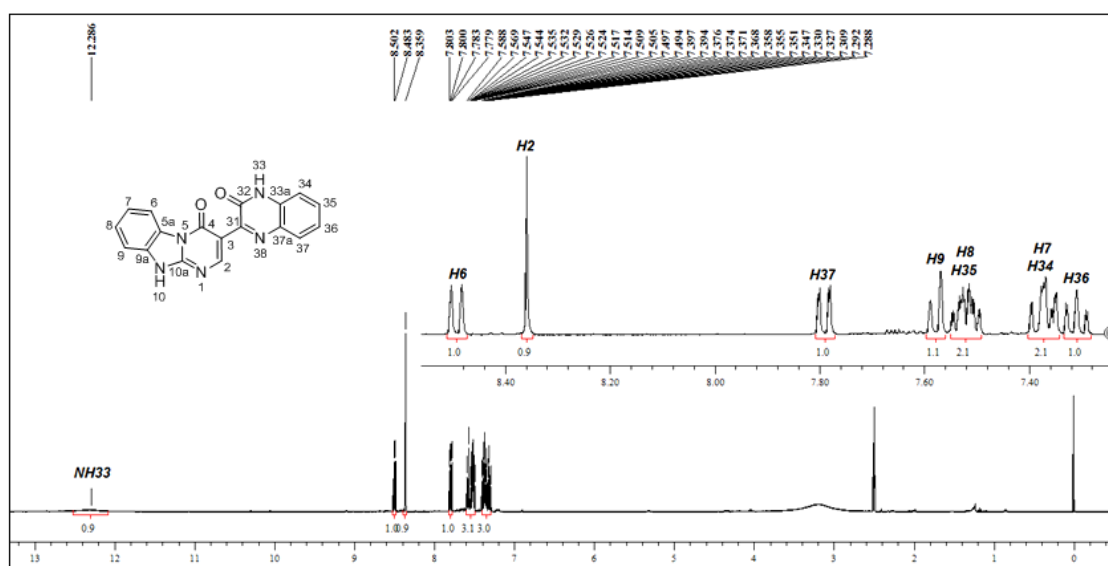

<sup>1</sup>H NMR spectrum of compound **11d** in DMSO-*d*<sub>6</sub> at 25 °C.

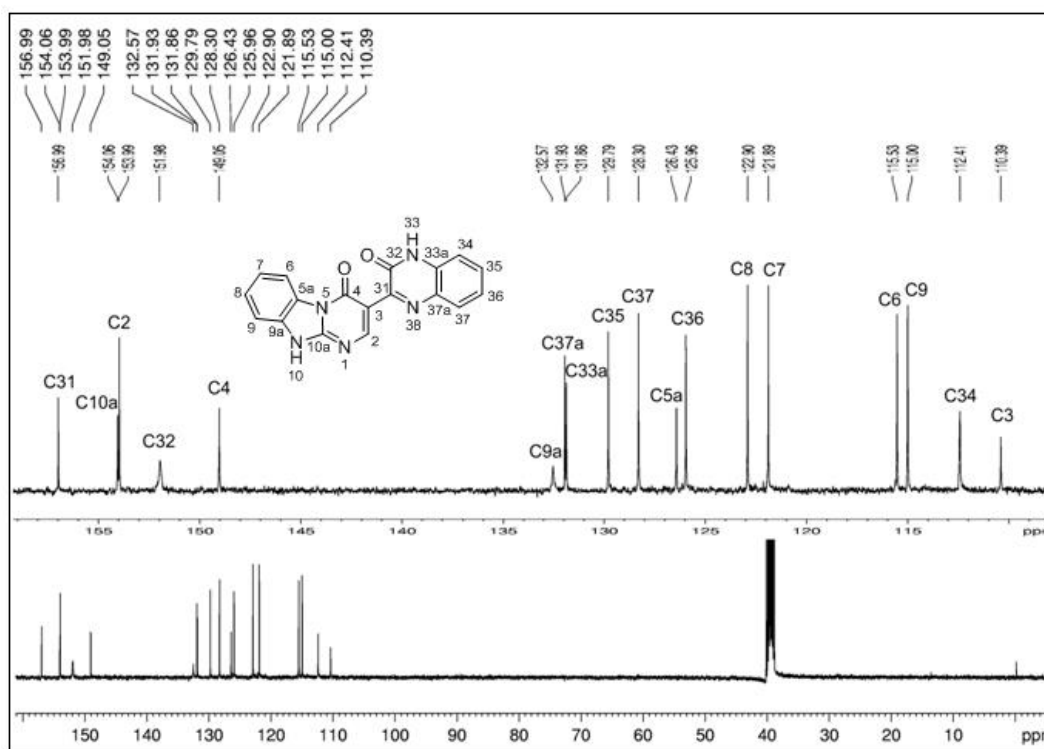

$^{13}\text{C}$  NMR spectrum of compound **11d** in  $\text{DMSO}-d_6$  at  $25^\circ\text{C}$ .

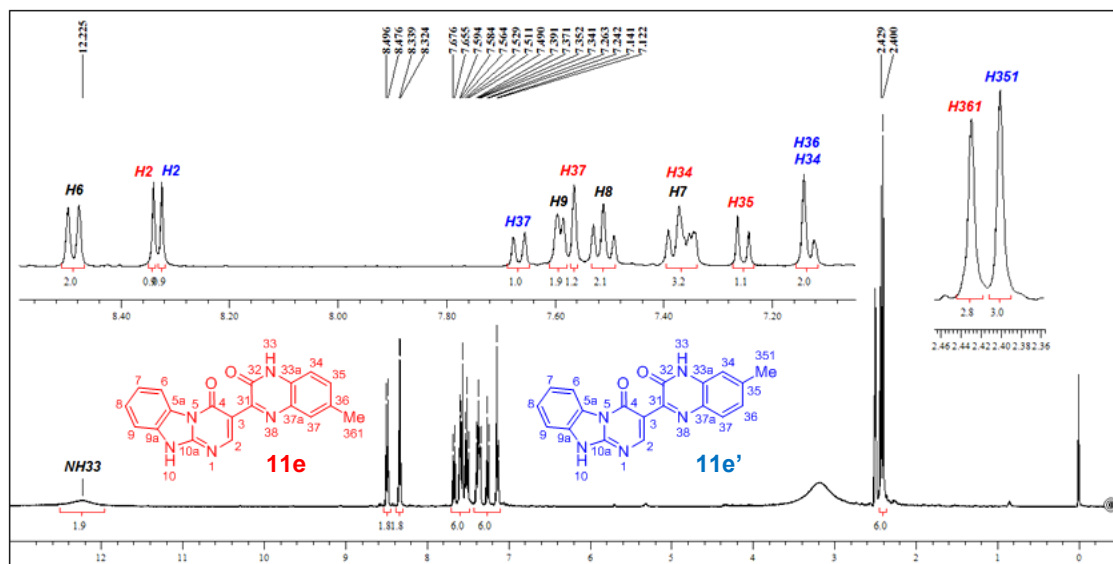

$^1\text{H}$  NMR spectrum of compound **11e** and **11e'** in  $\text{DMSO}-d_6$  at  $25^\circ\text{C}$ .

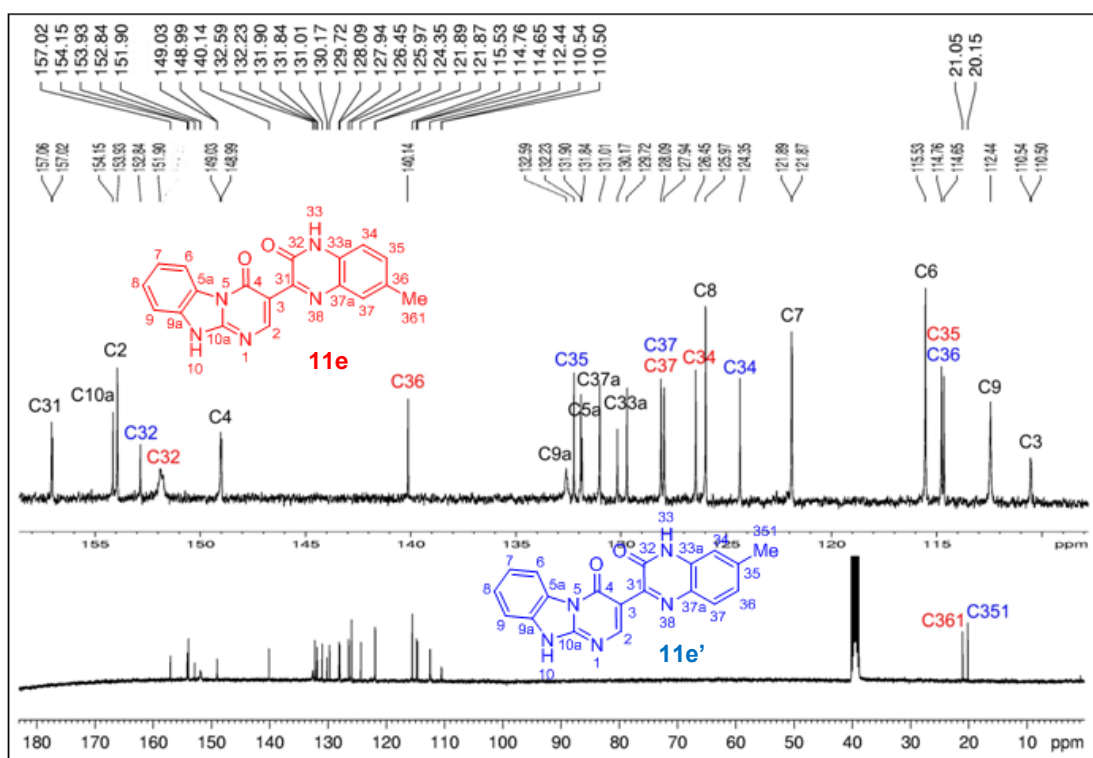

<sup>13</sup>C NMR spectrum of compound **11e** and **11e'** in DMSO-*d*<sub>6</sub> at 25 °C.

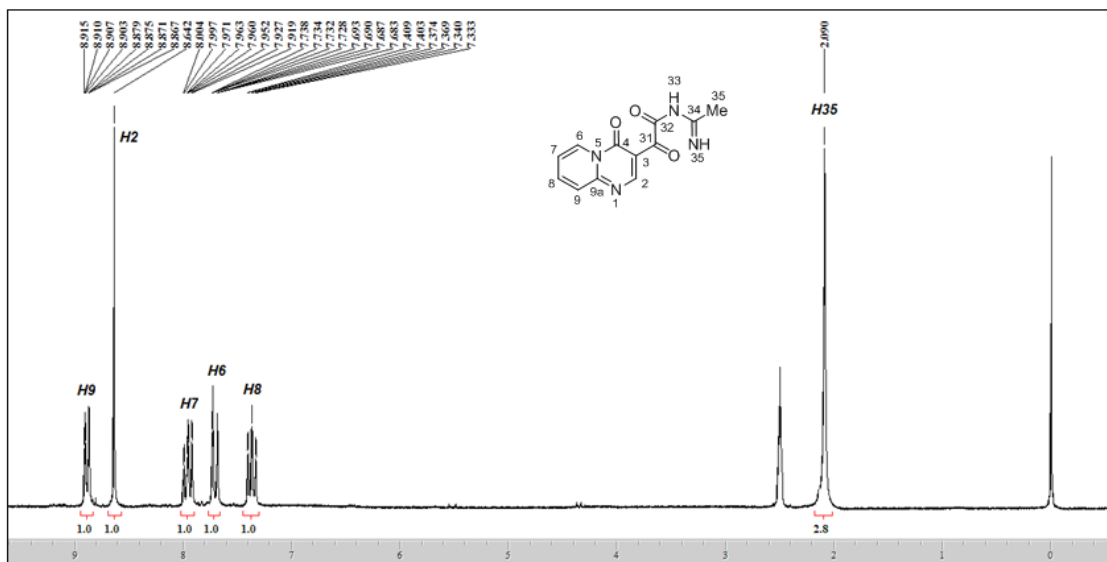

<sup>1</sup>H NMR spectrum of compound **12g** in DMSO-*d*<sub>6</sub> at 25 °C.

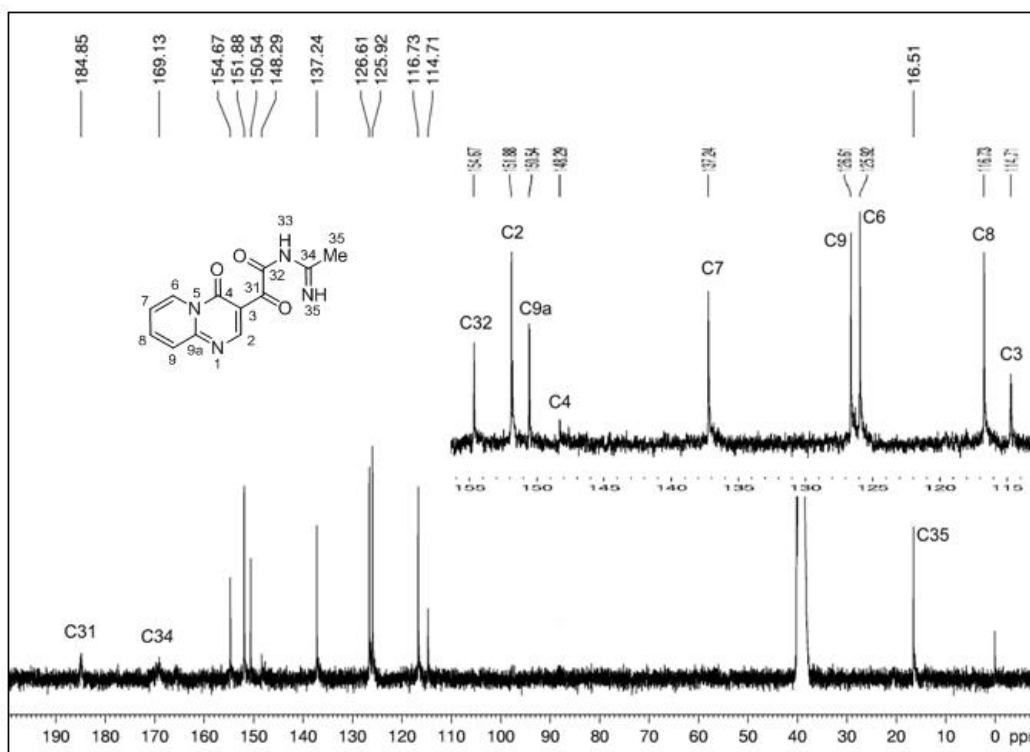

$^{13}\text{C}$  NMR spectrum of compound **12g** in  $\text{DMSO-}d_6$  at 25 °C.

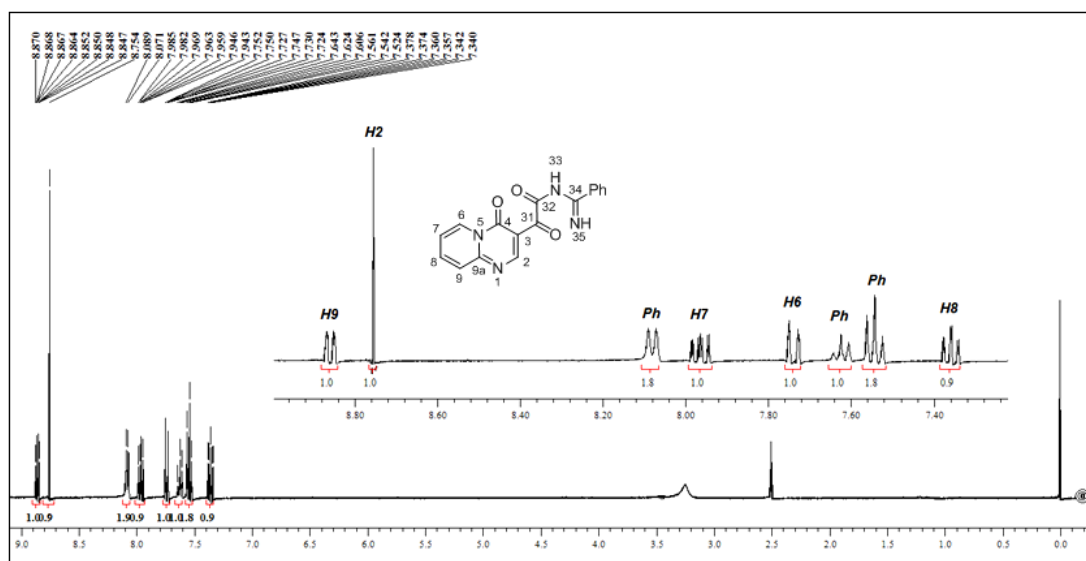

$^1\text{H}$  NMR spectrum of compound **12h** in  $\text{DMSO-}d_6$  at 25 °C.

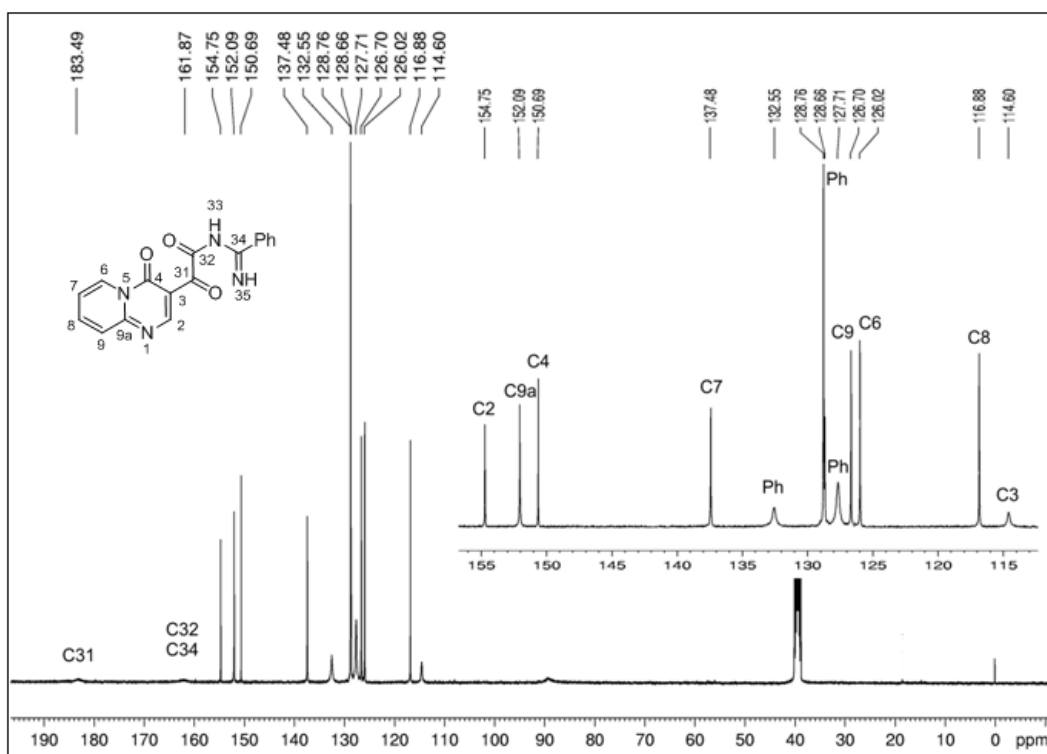

$^{13}\text{C}$  NMR spectrum of compound **12h** in  $\text{DMSO-}d_6$  at  $25\text{ }^\circ\text{C}$ .

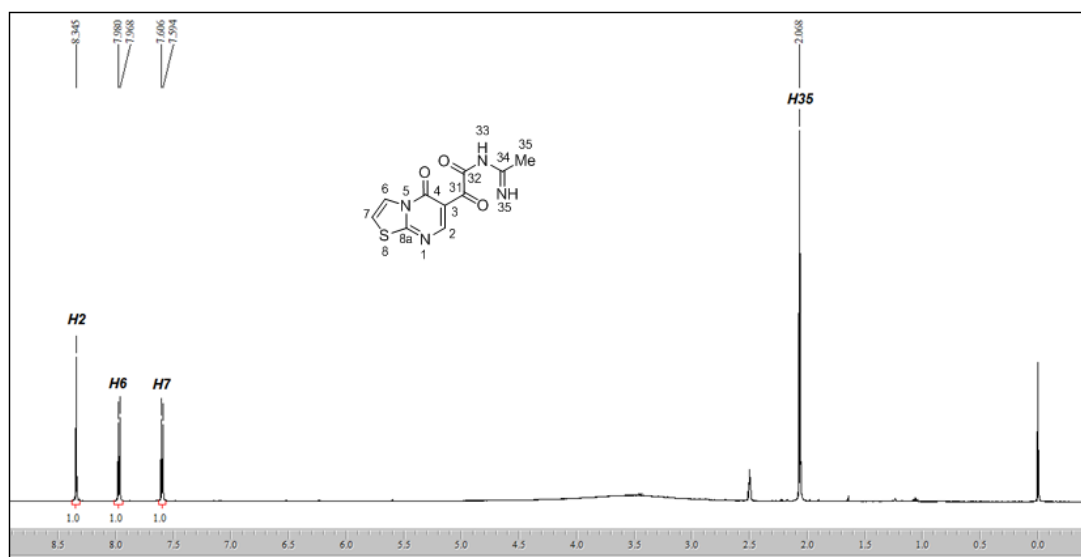

$^1\text{H}$  NMR spectrum of compound **13g** in  $\text{DMSO-}d_6$  at  $25\text{ }^\circ\text{C}$ .

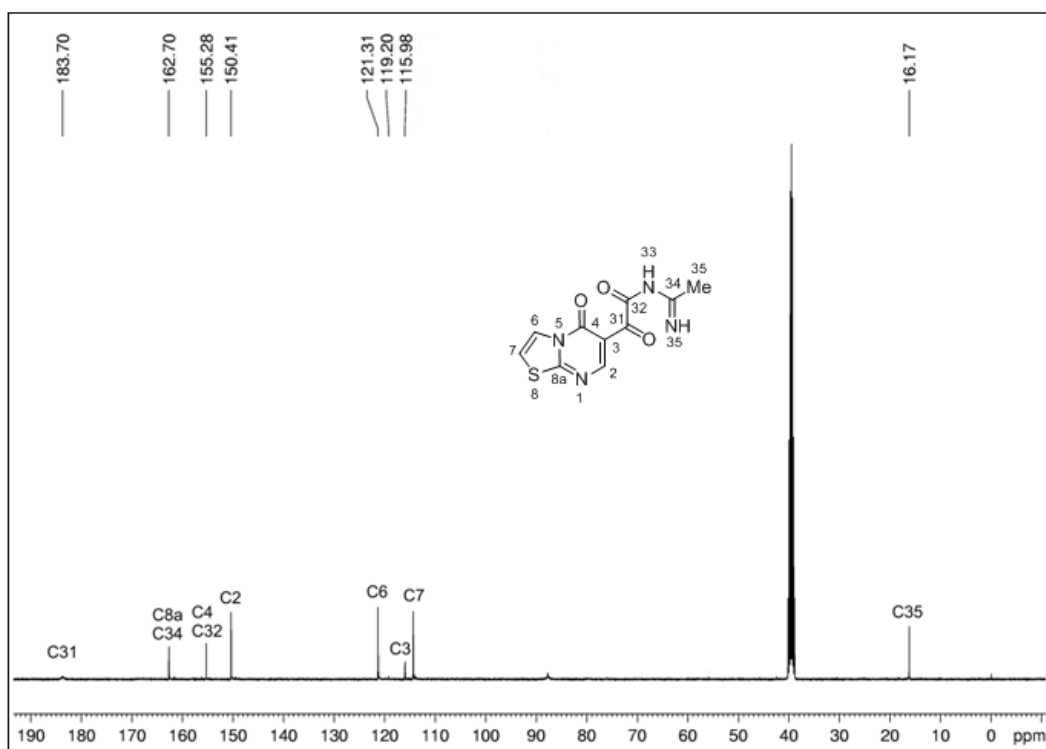

<sup>13</sup>C NMR spectrum of compound **13g** in DMSO-*d*<sub>6</sub> at 25 °C.

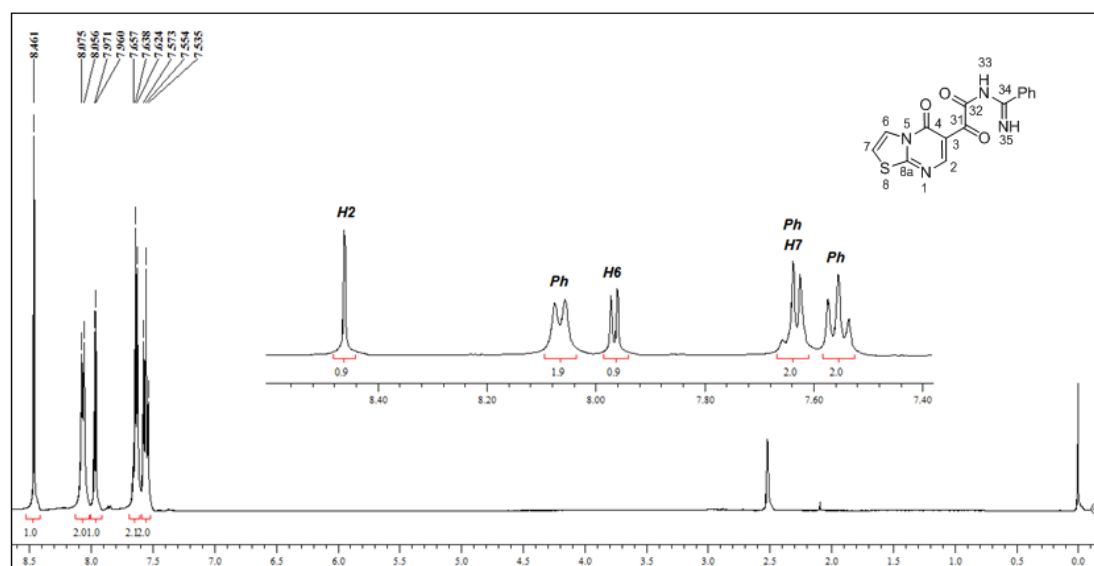

<sup>1</sup>H NMR spectrum of compound **13h** in DMSO-*d*<sub>6</sub> at 25 °C.

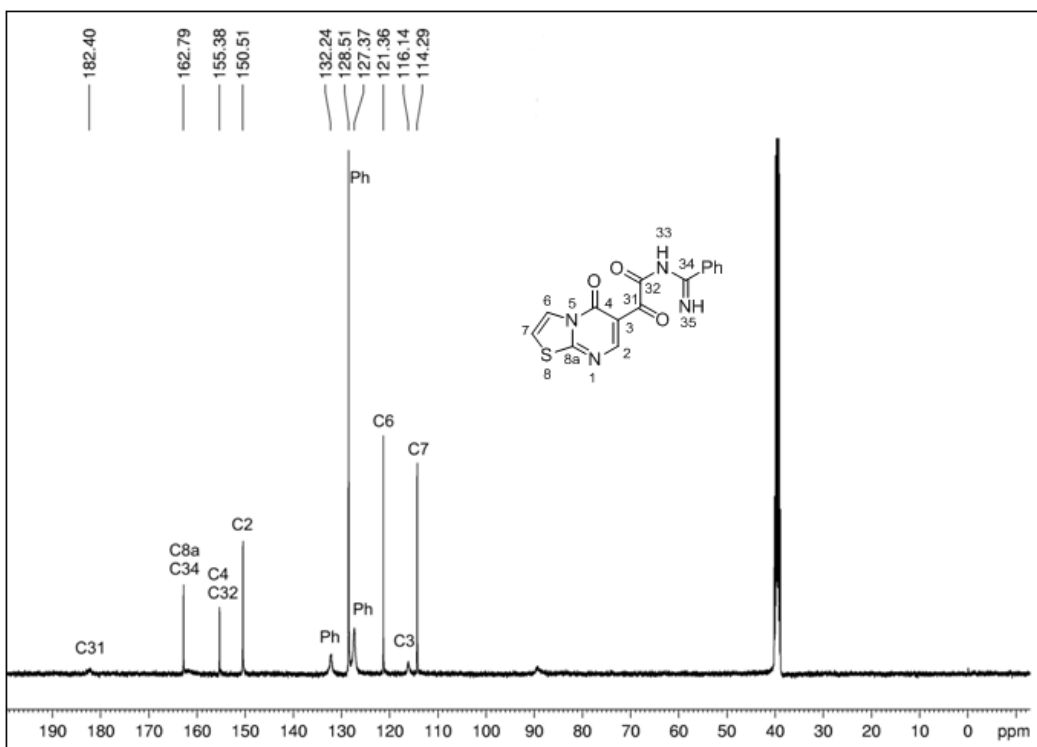

$^{13}\text{C}$  NMR spectrum of compound **13h** in  $\text{DMSO-}d_6$  at  $25\text{ }^\circ\text{C}$ .



## 5. Mass spectra

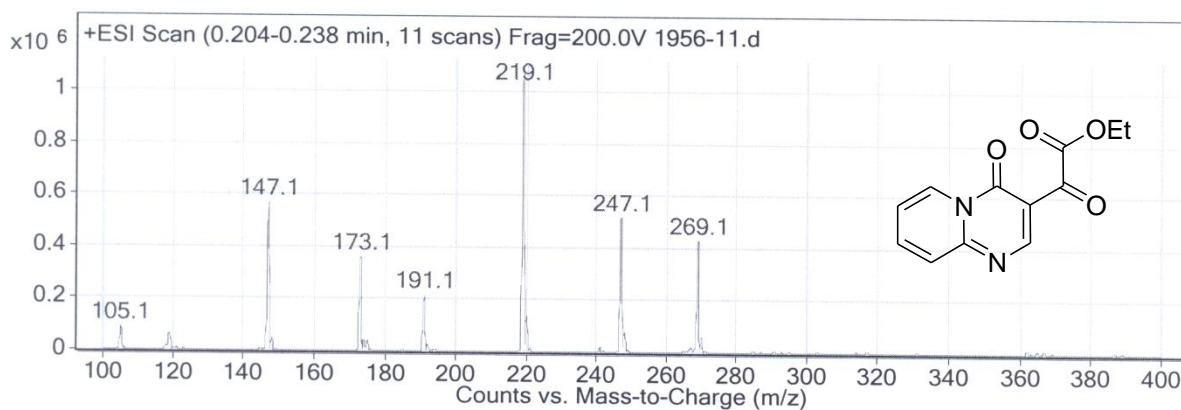

Mass spectrum of compound 5.

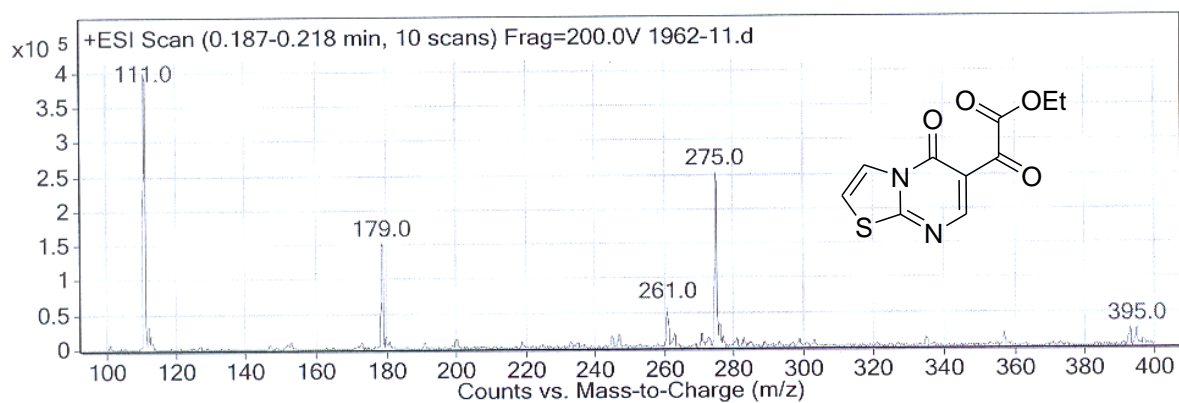

Mass spectrum of compound 6.

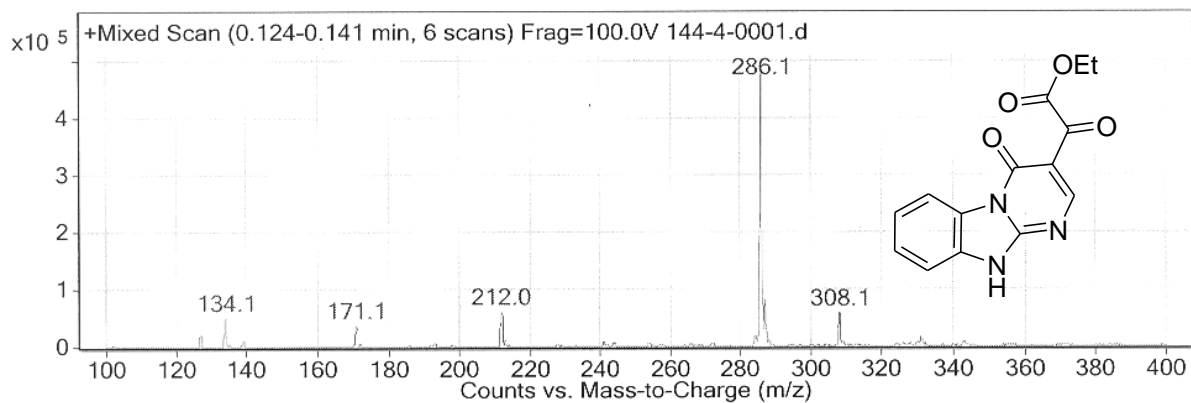

Mass spectrum of compound 7.

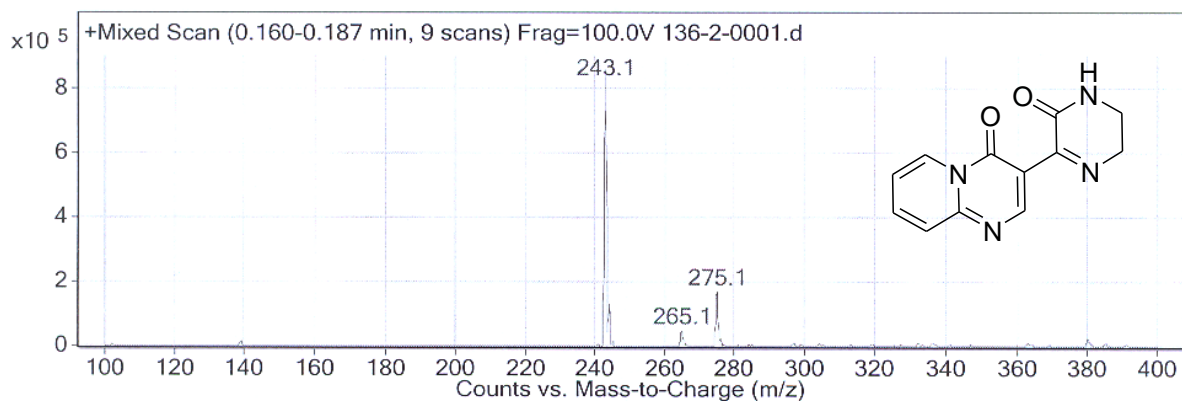

Mass spectrum of compound **9a**.

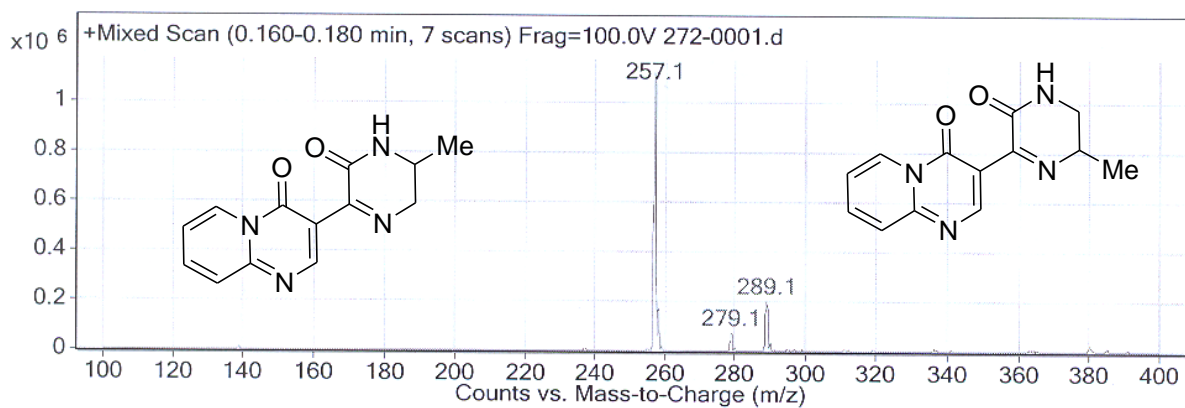

Mass spectrum of compounds **9b** and **9b'**.

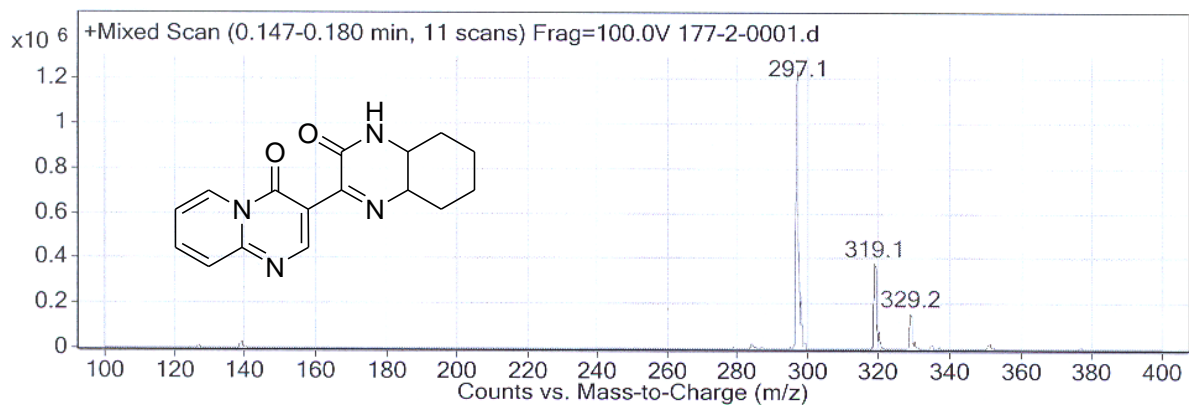

Mass spectrum of compound **9c**.

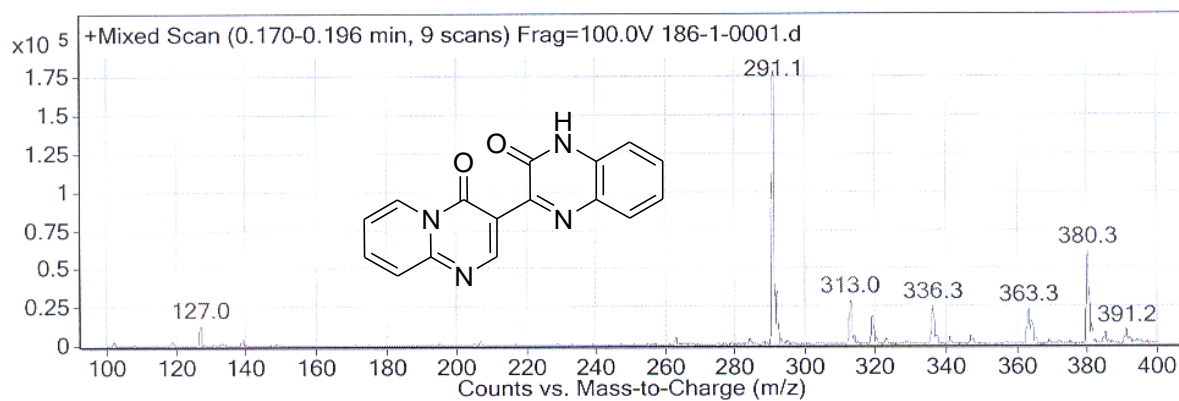

Mass spectrum of compound **9d**.

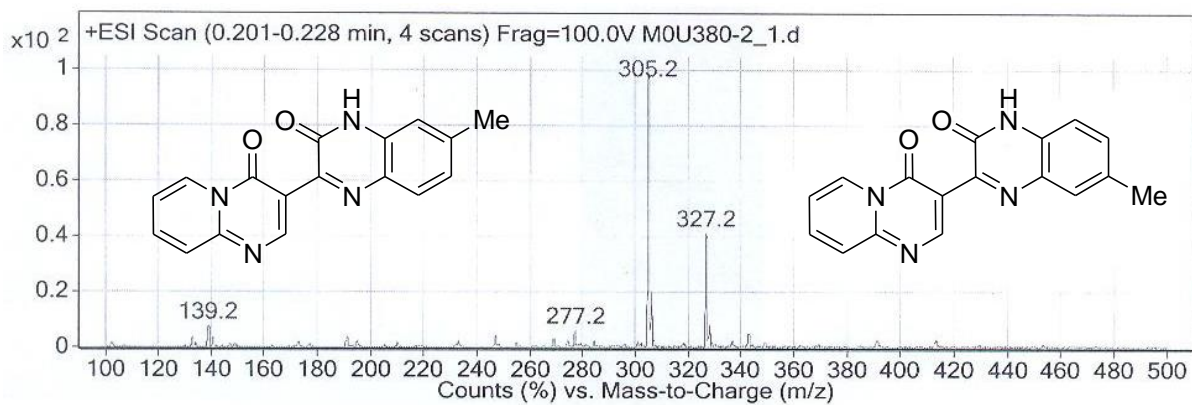

Mass spectrum of compounds **9e** and **9e'**.

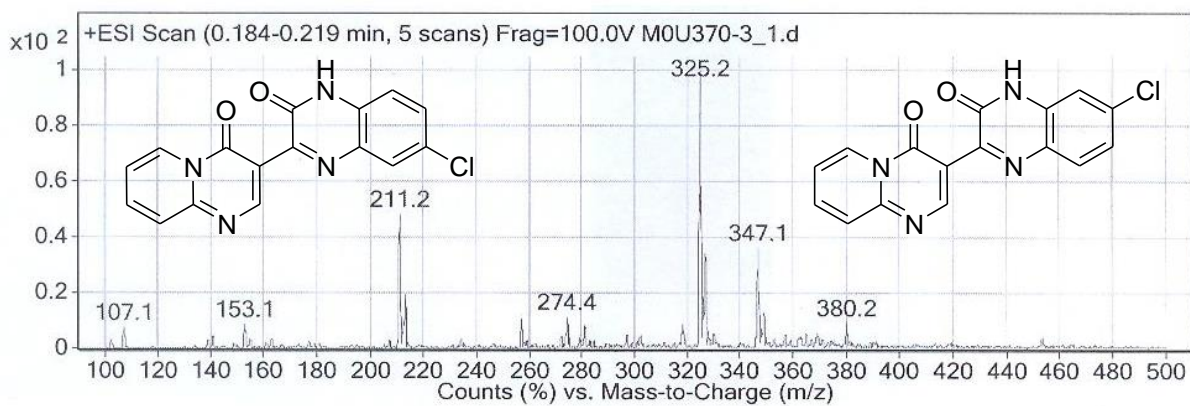

Mass spectrum of compounds **9f** and **9f'**.

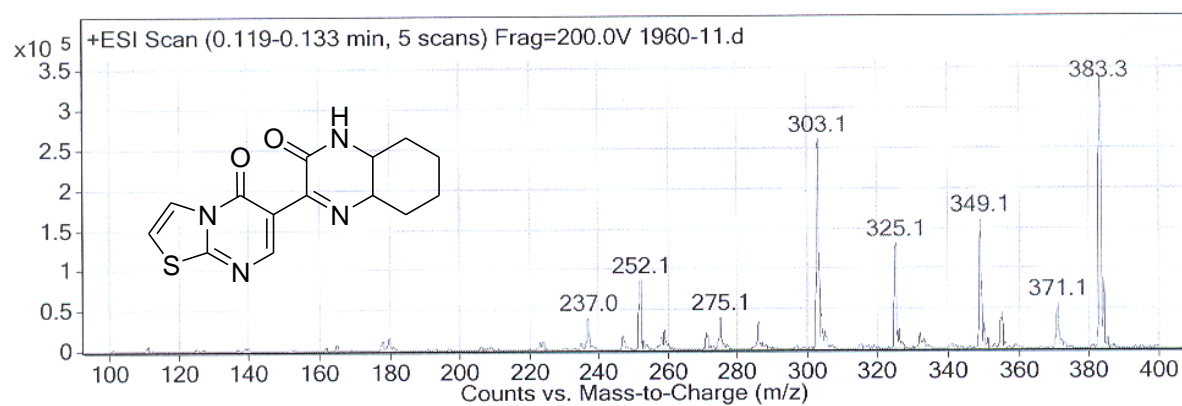

Mass spectrum of compound **10c**.

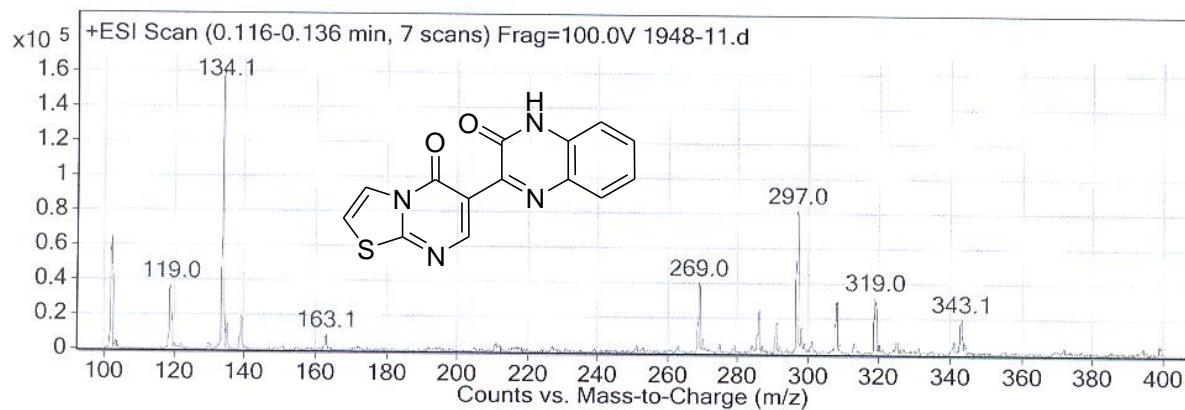

Mass spectrum of compound **10d**.

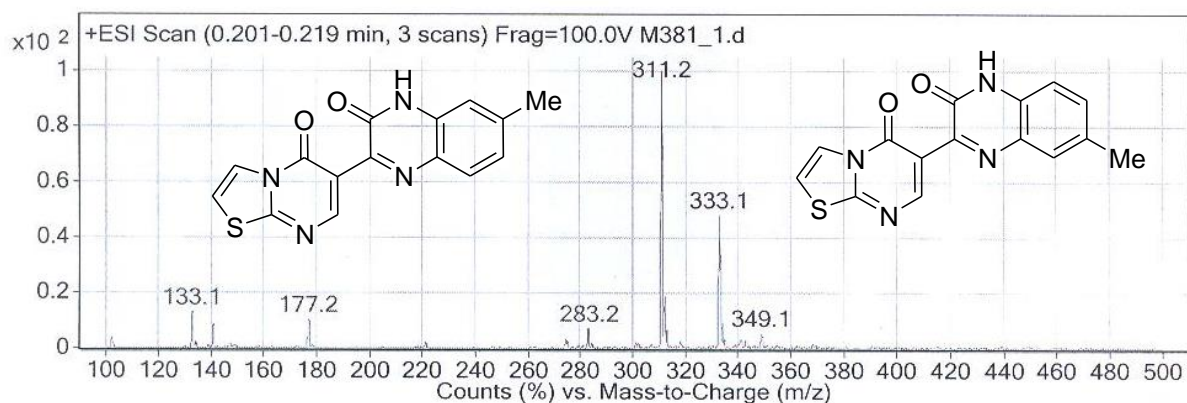

Mass spectrum of compounds **10e** and **10e'**.



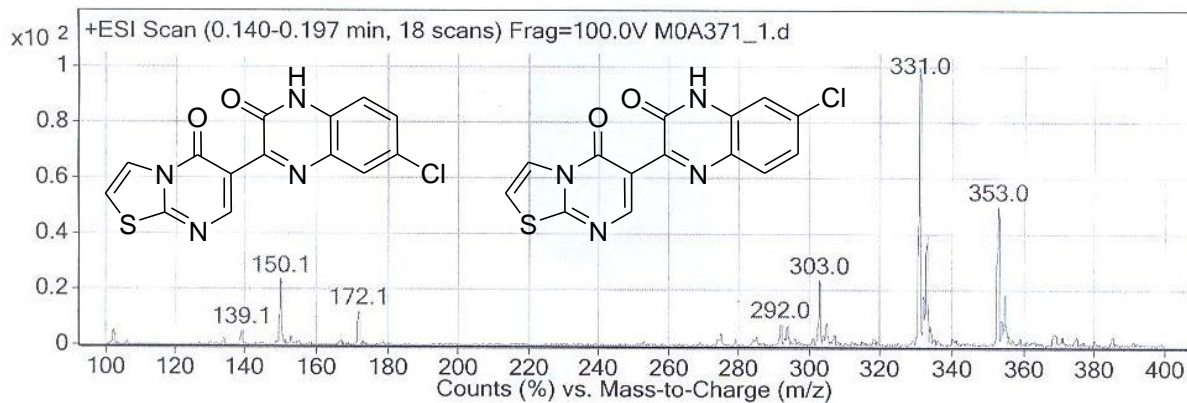

Mass spectrum of compounds **10f** and **10f'**.

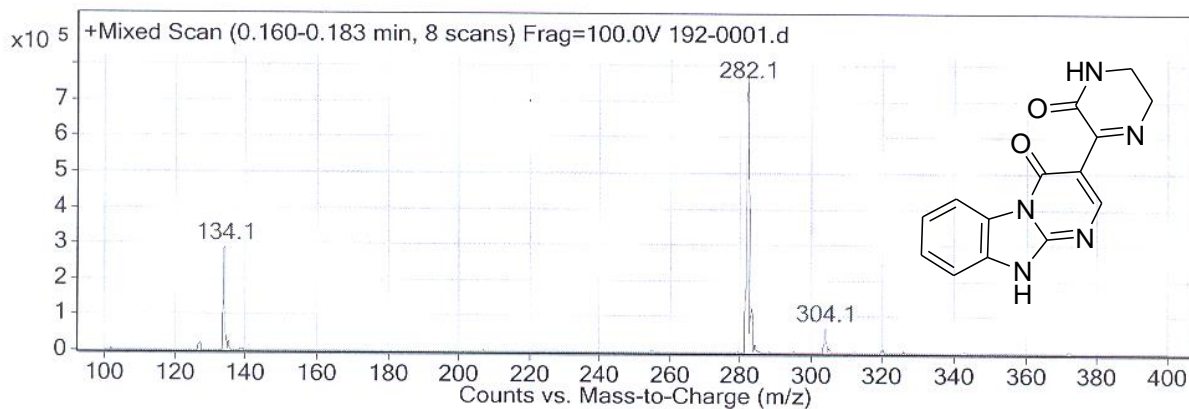

Mass spectrum of compound **11a**.

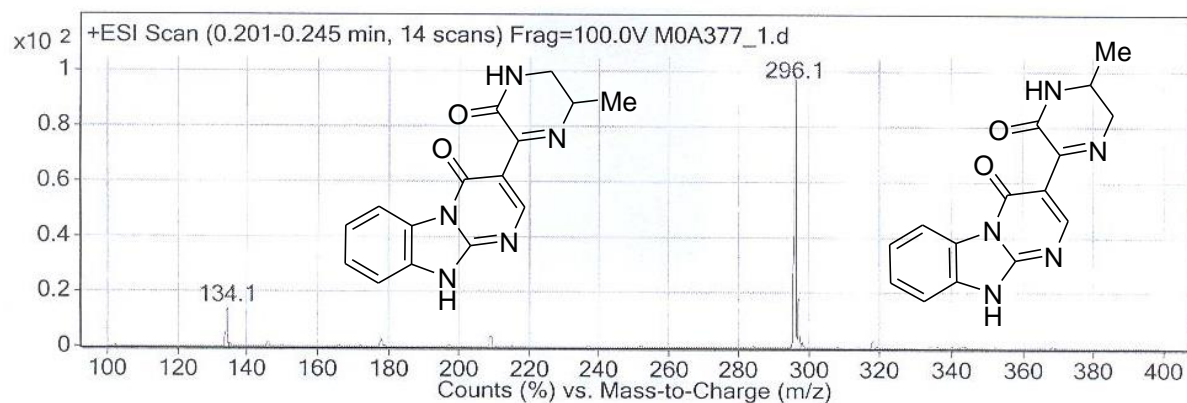

Mass spectrum of compounds **11b** and **11b'**.

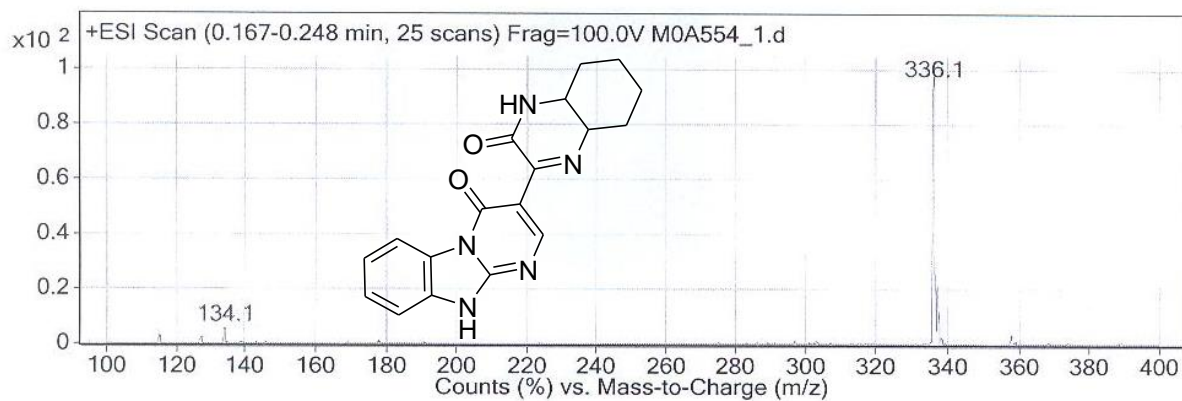

Mass spectrum of compound **11c**.

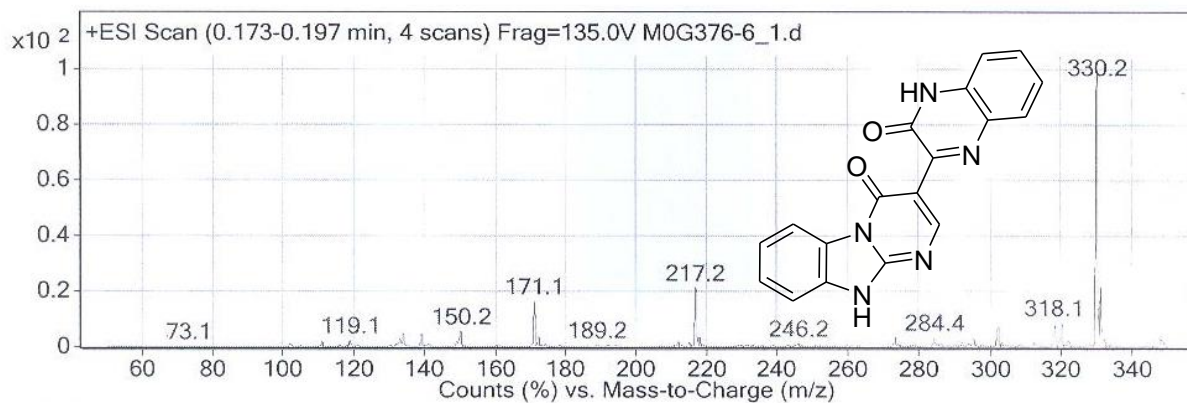

Mass spectrum of compound **11d**.

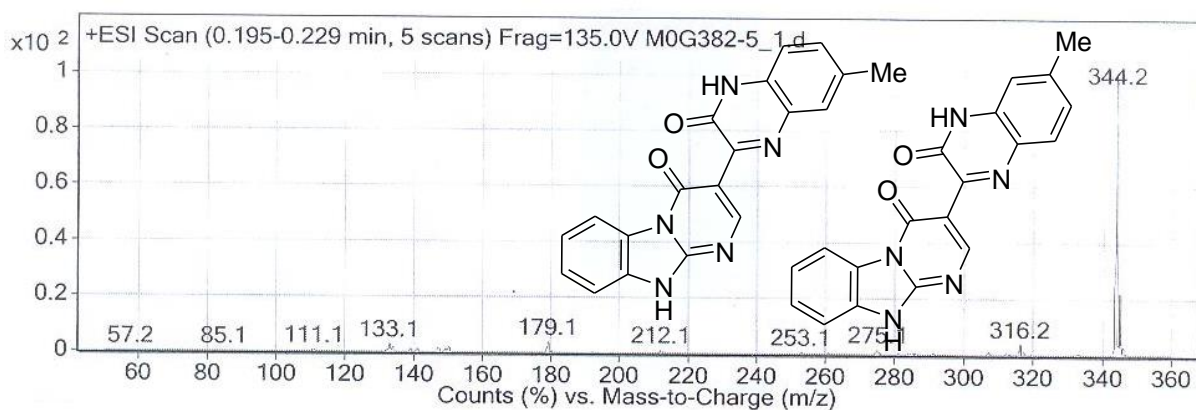

Mass spectrum of compounds **11e** and **11e'**.

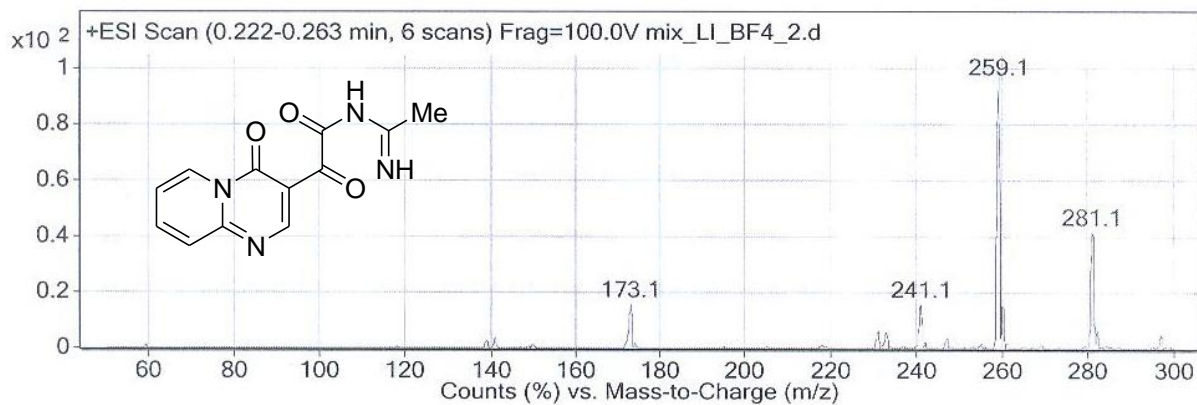

Mass spectrum of compound **12g**.

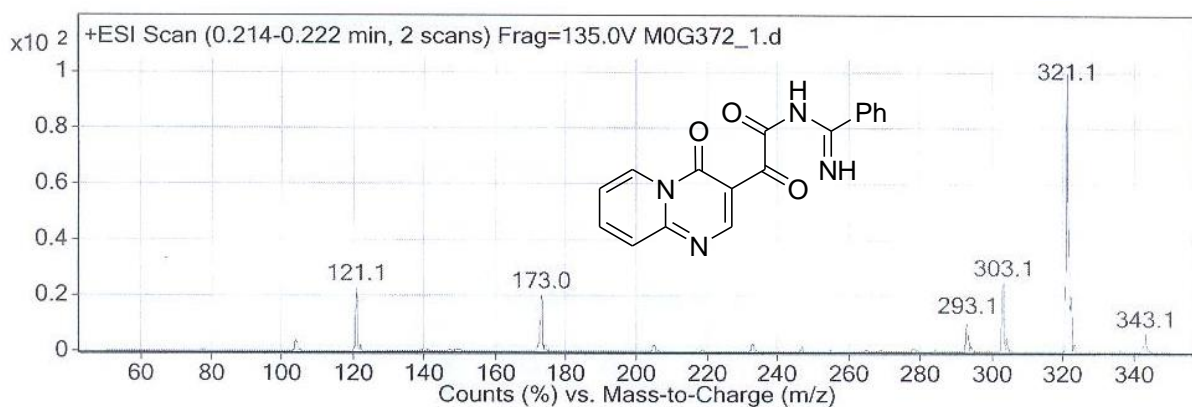

Mass spectrum of compound **12h**.

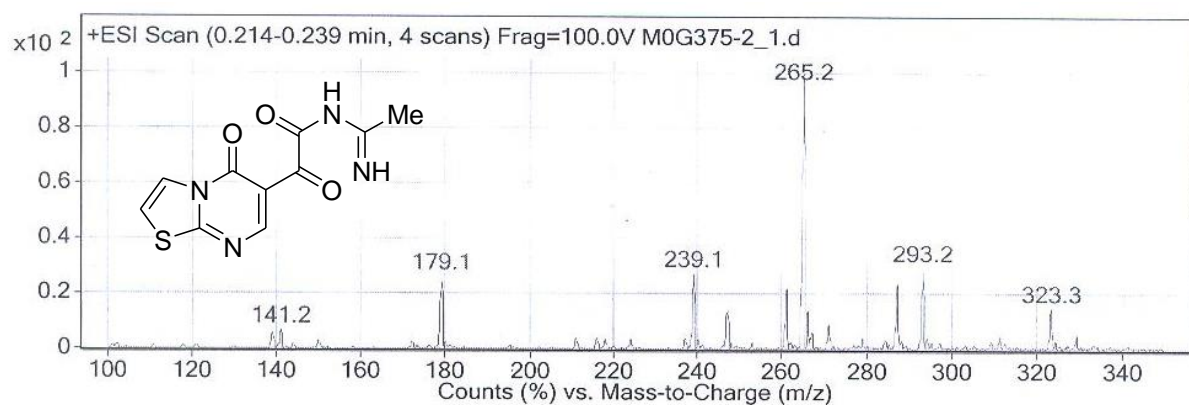

Mass spectrum of compound **13g**.

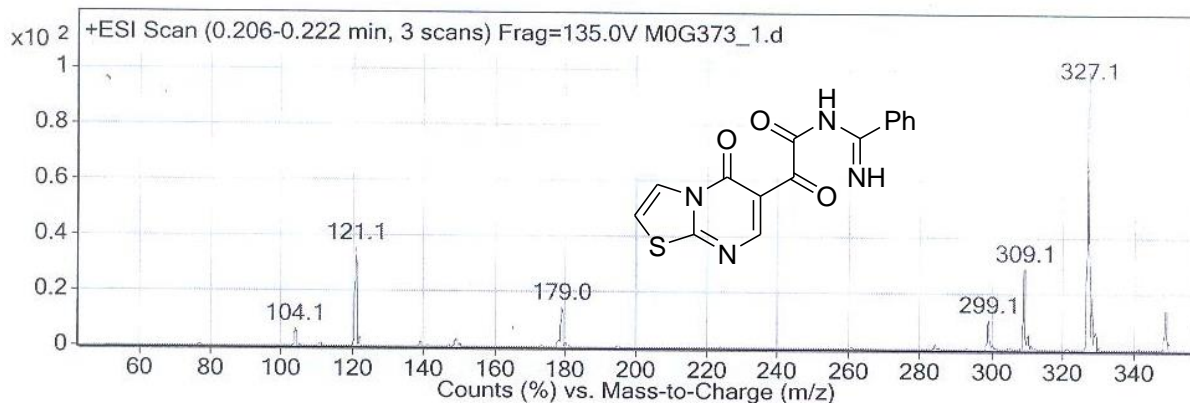

Mass spectrum of compound **13h**.

**Table S3:** Atomic coordinates used in theoretical calculations for all compounds

| Compound | Atoms               | Coordinates |             |             |
|----------|---------------------|-------------|-------------|-------------|
| 1        | C                   | 1.74751000  | -1.38630400 | 0.01450200  |
|          | C                   | -4.42378600 | -0.85668800 | 0.29254800  |
|          | H                   | -3.99423100 | -1.70006600 | 0.83258800  |
|          | H                   | -4.91093500 | -0.20454800 | 1.01750700  |
|          | C                   | -5.36774100 | -1.29956200 | -0.80107300 |
|          | H                   | -4.85776400 | -1.94441500 | -1.51605300 |
|          | H                   | -6.19801800 | -1.85739100 | -0.36609800 |
|          | H                   | -5.77358900 | -0.44212500 | -1.33746700 |
|          | O                   | -0.62185900 | -1.54873700 | -0.19966700 |
|          | O                   | -1.66865500 | 2.14564500  | -0.81348200 |
|          | O                   | -2.34302100 | 0.17940000  | 1.66962600  |
|          | C                   | 1.14708900  | 1.58204900  | -0.30948400 |
|          | H                   | 2.09620800  | 1.21135300  | -0.66823500 |
|          | N                   | 1.17599300  | 2.87879500  | -0.03221900 |
|          | C                   | 2.31027000  | 3.68767700  | -0.46438000 |
|          | H                   | 1.98938400  | 4.42659800  | -1.20106600 |
|          | H                   | 2.74294400  | 4.21249100  | 0.38798900  |
|          | H                   | 3.06726800  | 3.05330700  | -0.91774000 |
|          | C                   | 0.14938000  | 3.58098500  | 0.72746100  |
|          | H                   | -0.32051700 | 2.89318300  | 1.42603500  |
| H        | 0.63263900          | 4.38227500  | 1.28419600  |             |
| H        | -0.62229500         | 3.98973500  | 0.07674100  |             |
| Cl       | 1.63604800          | -3.12933300 | 0.31182600  |             |
| Cl       | 2.66151400          | -0.63811700 | 1.37572700  |             |
| Cl       | 2.65072400          | -1.13171700 | -1.53767000 |             |
| C        | 0.29446000          | -0.75870100 | -0.13722700 |             |
| C        | 0.09442000          | 0.68256600  | -0.17995400 |             |
| C        | -1.30926700         | 1.11874500  | -0.26351500 |             |
| C        | -2.37286100         | 0.29441500  | 0.46876700  |             |
| O        | -3.34406000         | -0.12096000 | -0.33482100 |             |
| Energy:  | -2124.88662643 a.u. |             |             |             |



|          |   |                    |             |             |
|----------|---|--------------------|-------------|-------------|
|          | C | 1.19375700         | 1.16548000  | -0.00347400 |
|          | C | -0.18543800        | 1.21432800  | 0.00520600  |
|          | C | -0.89867000        | 0.00289900  | 0.00761000  |
|          | C | 1.04444100         | -1.20642700 | -0.00235300 |
|          | C | 1.83779400         | -0.07058600 | -0.00507100 |
| <b>2</b> | H | 1.76648900         | 2.08379400  | -0.00687600 |
|          | H | -0.71195400        | 2.15943900  | 0.01733200  |
|          | H | 1.49787700         | -2.19171900 | -0.00686900 |
|          | H | 2.91512500         | -0.14866400 | -0.01042800 |
|          | N | -0.28919800        | -1.18548600 | -0.00100600 |
|          | N | -2.27683900        | -0.01700500 | 0.06559200  |
|          | H | -2.76785000        | 0.78584900  | -0.28781200 |
|          | H | -2.68873400        | -0.90542600 | -0.16896000 |
| Energy:  |   | -303.76346788 a.u. |             |             |

|          |   |                    |             |             |
|----------|---|--------------------|-------------|-------------|
|          | N | -0.15569900        | 1.34810400  | -0.00203600 |
|          | C | 1.20660700         | 1.15780500  | -0.00392900 |
|          | H | 1.85296800         | 2.02276600  | -0.00908400 |
|          | C | 1.64198600         | -0.12340300 | -0.00967900 |
| <b>3</b> | H | 2.64886900         | -0.50100300 | -0.02413000 |
|          | C | -0.77865700        | 0.21048600  | 0.00203700  |
|          | N | -2.14565100        | 0.08467700  | 0.07244600  |
|          | H | -2.63369200        | 0.94081700  | -0.14175200 |
|          | H | -2.55043700        | -0.73291900 | -0.35220800 |
|          | S | 0.27325800         | -1.20177800 | 0.00648300  |
| Energy:  |   | -624.53087799 a.u. |             |             |

|          |   |                    |             |             |
|----------|---|--------------------|-------------|-------------|
|          | C | -0.19924800        | 0.69855700  | 0.00053600  |
|          | C | -0.15939100        | -0.71158700 | 0.00035200  |
|          | C | -1.35019000        | -1.43130700 | 0.00375400  |
|          | C | -2.54581900        | -0.72248900 | 0.00161800  |
|          | C | -2.56561700        | 0.67630900  | -0.00161000 |
|          | C | -1.38536400        | 1.41426600  | 0.00162400  |
|          | H | -1.33438300        | -2.51233100 | 0.00660900  |
|          | H | -3.48327100        | -1.26234900 | 0.00201600  |
| <b>4</b> | H | -3.51435200        | 1.19547300  | -0.00531200 |
|          | H | -1.40255600        | 2.49613100  | 0.00283100  |
|          | C | 1.87944200         | -0.07297800 | -0.00159200 |
|          | N | 1.15618300         | -1.15803200 | 0.00796400  |
|          | N | 1.13611400         | 1.08528400  | 0.01398200  |
|          | H | 1.49015300         | 2.01108900  | -0.14733200 |
|          | N | 3.25584800         | -0.03373000 | -0.08268900 |
|          | H | 3.65949700         | -0.94940500 | 0.04487000  |
|          | H | 3.70500700         | 0.66211800  | 0.49343200  |
| Energy:  |   | -435.38775237 a.u. |             |             |

|          |   |            |             |             |
|----------|---|------------|-------------|-------------|
| <b>5</b> | N | 1.91560400 | -0.47054200 | 0.00356900  |
|          | N | 2.30879100 | 1.86180100  | -0.29163400 |
|          | C | 4.15105300 | 0.35470300  | -0.21154800 |
|          | H | 4.79240500 | 1.21184900  | -0.34678700 |

|   |             |             |             |
|---|-------------|-------------|-------------|
| C | 4.63400600  | -0.91466500 | -0.08605300 |
| H | 5.69912300  | -1.09749000 | -0.11997100 |
| C | 3.73735100  | -1.99288800 | 0.08848000  |
| H | 4.09270800  | -3.00670000 | 0.19079200  |
| C | 2.40313800  | -1.74482700 | 0.12663200  |
| H | 1.63875100  | -2.49461700 | 0.25158400  |
| C | 2.75891300  | 0.61532600  | -0.16845400 |
| C | 0.04542200  | 1.04926900  | -0.04819300 |
| C | 0.99407500  | 2.04534500  | -0.23134900 |
| H | 0.64114600  | 3.06524300  | -0.32835300 |
| C | -4.15493400 | -1.06721400 | 0.10625800  |
| H | -3.64525800 | -1.86409500 | 0.64692900  |
| H | -4.82020000 | -0.55741900 | 0.80267200  |
| C | -4.88760900 | -1.57915100 | -1.11185100 |
| H | -4.20286400 | -2.07913800 | -1.79638500 |
| H | -5.65130900 | -2.29546800 | -0.80624900 |
| H | -5.37582600 | -0.76408600 | -1.64553600 |
| O | -3.15542600 | -0.11957200 | -0.35035500 |
| O | -2.45603700 | 0.21528700  | 1.77497800  |
| O | -1.78844000 | 2.52443800  | -0.28314300 |
| O | -0.22791400 | -1.31186800 | 0.16340000  |
| C | -2.37496500 | 0.40744100  | 0.58966000  |
| C | -1.37995200 | 1.41913300  | 0.01134300  |
| C | 0.45401900  | -0.31300000 | 0.05652700  |

Energy: -874.02013780 a.u.

|          |   |             |             |             |
|----------|---|-------------|-------------|-------------|
| <b>6</b> | N | 2.31722800  | 1.71485400  | -0.25658700 |
|          | C | 0.01384900  | 0.98429100  | -0.05371200 |
|          | C | 0.99315400  | 1.94649600  | -0.21554700 |
|          | H | 0.68297100  | 2.97916600  | -0.31264800 |
|          | C | -4.26740500 | -0.97556800 | 0.12871800  |
|          | H | -3.77881300 | -1.78391400 | 0.67167100  |
|          | H | -4.90772600 | -0.43675600 | 0.82659500  |
|          | C | -5.02872900 | -1.47321200 | -1.07755200 |
|          | H | -4.36758800 | -2.00126600 | -1.76416000 |
|          | H | -5.81219500 | -2.16149000 | -0.75800500 |
|          | H | -5.49548800 | -0.64717400 | -1.61352000 |
|          | O | -3.24068400 | -0.06587200 | -0.34653600 |
|          | O | -2.49831300 | 0.25475400  | 1.76680400  |
|          | O | -1.76951700 | 2.51499100  | -0.33821400 |
|          | O | -0.34415700 | -1.38214700 | 0.15015000  |
|          | C | -2.42880700 | 0.43588800  | 0.57894000  |
|          | C | -1.40152400 | 1.40419700  | -0.01665900 |
|          | C | 0.37042700  | -0.40544000 | 0.05621100  |
|          | S | 4.31010500  | -0.11679300 | -0.14534600 |
|          | C | 3.75068300  | -1.75885600 | 0.05772300  |
|          | H | 4.44945400  | -2.57417300 | 0.11600900  |
|          | C | 2.41373800  | -1.83028600 | 0.12549100  |
|          | H | 1.78555200  | -2.69532700 | 0.24711900  |
|          | C | 2.66355900  | 0.46073000  | -0.13299500 |

Energy:           N           1.80132100 -0.58823000 0.02103300  
 -1194.79226400 a.u.

7

N           1.17640600 2.73821000 -0.26405500  
 C           -0.82200200 1.37875000 -0.02680500  
 C           -0.15594600 2.58135900 -0.18519300  
 H           -0.75009300 3.48434300 -0.24670200  
 C           -4.37411200 -1.69929700 0.06995400  
 H           -3.67967800 -2.37064900 0.57417800  
 H           -5.13093900 -1.39123100 0.79089800  
 C           -4.98252800 -2.32542700 -1.16340200  
 H           -4.20893100 -2.61824600 -1.87281200  
 H           -5.54666900 -3.21598700 -0.88332000  
 H           -5.66093700 -1.63150400 -1.65918700  
 O           -3.63854000 -0.52380100 -0.35483600  
 O           -3.03243200 -0.09228200 1.78168000  
 O           -2.96534400 2.37046400 -0.19587700  
 O           -0.51332500 -0.99774500 0.12493300  
 C           -3.00437900 0.14904200 0.60298000  
 C           -2.29209000 1.39054300 0.05587800  
 C           -0.08716500 0.13758700 0.03885900  
 N           1.32310000 0.36111100 -0.03263100  
 N           3.20308800 1.49352000 -0.22656500  
 H           3.81456400 2.28465900 -0.33006500  
 C           2.37290500 -1.95546900 0.14676700  
 H           1.44864200 -2.50130700 0.23967900  
 C           3.61507100 -2.58096800 0.15559900  
 H           3.66122200 -3.65582900 0.25917000  
 C           4.80186500 -1.85400900 0.03419900  
 H           5.74791500 -2.37707000 0.04573800  
 C           4.79532800 -0.47035200 -0.10099700  
 H           5.71431000 0.09089100 -0.19404000  
 C           2.36730100 -0.57545600 0.01131700  
 C           3.55890500 0.15501700 -0.11049400  
 C           1.85177200 1.61850600 -0.17999100  
 Energy:       -1005.65892941 a.u.

8a

C           0.68060200 0.60234500 -0.30308500  
 H           0.59517400 0.58540200 -1.39268100  
 H           1.17665300 1.54628500 -0.03387400  
 C           -0.72350100 0.57756000 0.30723200  
 H           -0.63019300 0.59574300 1.39848800  
 H           -1.25366800 1.49188300 0.03188600  
 N           -1.54668600 -0.57235900 -0.05857600  
 H           -1.79945200 -0.51774900 -1.03900300  
 H           -0.98454500 -1.41106900 0.04184800  
 N           1.42797000 -0.59293800 0.10508900  
 H           2.27829600 -0.69250300 -0.43425700  
 H           1.70613700 -0.52035000 1.07711600  
 Energy:       -190.59977801 a.u.

|           |   |                    |             |             |
|-----------|---|--------------------|-------------|-------------|
|           | C | -0.47795900        | 0.03530600  | 0.32070800  |
|           | H | -0.35442100        | 0.03888800  | 1.41752400  |
|           | C | 0.74025200         | -0.67880900 | -0.26393700 |
|           | H | 0.72070400         | -1.73153100 | 0.04662600  |
|           | H | 0.65681400         | -0.65326300 | -1.35236900 |
|           | C | -1.76780800        | -0.70990700 | -0.00483800 |
|           | H | -1.75242000        | -1.72290600 | 0.40175300  |
| <b>8b</b> | H | -2.63154900        | -0.19455800 | 0.41905900  |
|           | H | -1.91061900        | -0.76501400 | -1.08512000 |
|           | N | -0.52734400        | 1.38738300  | -0.23732100 |
|           | H | -1.20356800        | 1.95745200  | 0.25581100  |
|           | H | 0.38347000         | 1.81812000  | -0.12133500 |
|           | N | 1.97683500         | 0.01895300  | 0.10930300  |
|           | H | 2.22692300         | -0.18717000 | 1.06925900  |
|           | H | 2.75131700         | -0.28391200 | -0.46669300 |
| Energy:   |   | -229.93150832 a.u. |             |             |

|           |   |                    |             |             |
|-----------|---|--------------------|-------------|-------------|
|           | C | 0.50348700         | -0.70418700 | -0.00247600 |
|           | C | 0.50348300         | 0.70420400  | 0.00248800  |
|           | C | -0.71001700        | 1.38375100  | 0.02319000  |
|           | C | -1.91811800        | 0.69353800  | 0.01807900  |
|           | C | -1.91811600        | -0.69353700 | -0.01805100 |
|           | C | -0.71000900        | -1.38374100 | -0.02325400 |
|           | H | -0.70535000        | 2.46742700  | 0.03246000  |
| <b>8d</b> | H | -2.85008500        | 1.24189100  | 0.03136400  |
|           | H | -2.85007900        | -1.24189800 | -0.03125800 |
|           | H | -0.70534800        | -2.46741700 | -0.03256900 |
|           | N | 1.74466200         | -1.36522900 | -0.04429500 |
|           | H | 2.42006900         | -0.96491200 | 0.59461900  |
|           | H | 1.67046200         | -2.36036700 | 0.10475000  |
|           | N | 1.74472500         | 1.36520900  | 0.04434600  |
|           | H | 2.41993600         | 0.96492900  | -0.59480400 |
|           | H | 1.67042400         | 2.36031900  | -0.10477300 |
| Energy:   |   | -343.09204011 a.u. |             |             |

|           |   |             |             |             |
|-----------|---|-------------|-------------|-------------|
|           | C | 0.71565600  | 0.76516400  | -0.00028800 |
|           | C | 1.15146700  | -0.57414600 | 0.00108100  |
|           | C | 0.20149000  | -1.58577200 | -0.02502600 |
|           | C | -1.16041600 | -1.29446500 | -0.03153700 |
|           | C | -1.60498200 | 0.02231900  | -0.00010300 |
|           | C | -0.64676200 | 1.03865200  | 0.00937100  |
| <b>8e</b> | H | 0.53070100  | -2.61841100 | -0.03204300 |
|           | H | -1.87737200 | -2.10511200 | -0.05049600 |
|           | H | -0.96903800 | 2.07474100  | 0.01166000  |
|           | N | 1.69017100  | 1.77730000  | 0.04461900  |
|           | H | 2.47249200  | 1.59097800  | -0.56984000 |
|           | H | 1.31785200  | 2.69862800  | -0.12948100 |
|           | N | 2.53871600  | -0.82124900 | -0.03399900 |
|           | H | 3.04887800  | -0.25326500 | 0.63110800  |

|         |   |                    |             |             |
|---------|---|--------------------|-------------|-------------|
|         | H | 2.76825000         | -1.79502100 | 0.09844700  |
|         | C | -3.07430300        | 0.35714100  | 0.02450500  |
|         | H | -3.37043800        | 0.78720800  | 0.98479000  |
|         | H | -3.33291400        | 1.08574700  | -0.74673100 |
|         | H | -3.68350600        | -0.53120500 | -0.13977900 |
| Energy: |   | -382.42245660 a.u. |             |             |

|           |    |                    |             |             |
|-----------|----|--------------------|-------------|-------------|
|           | C  | 1.04437100         | 0.77471800  | 0.00008600  |
|           | C  | 1.53976100         | -0.54471200 | 0.00065500  |
|           | C  | 0.64030200         | -1.60328700 | -0.02506000 |
|           | C  | -0.73511500        | -1.38900600 | -0.03025400 |
|           | C  | -1.20364700        | -0.08781800 | 0.00108400  |
|           | C  | -0.32973800        | 0.99126400  | 0.01114200  |
|           | H  | 1.01844800         | -2.61833700 | -0.02967000 |
| <b>8f</b> | H  | -1.42346000        | -2.22024300 | -0.04505200 |
|           | H  | -0.71866500        | 2.00025400  | 0.01388300  |
|           | N  | 1.96806600         | 1.82876800  | 0.04282700  |
|           | H  | 2.76274100         | 1.67853600  | -0.56517900 |
|           | H  | 1.55830500         | 2.73521100  | -0.12345800 |
|           | N  | 2.93388200         | -0.72675800 | -0.03293000 |
|           | H  | 3.42166500         | -0.13235500 | 0.62536800  |
|           | H  | 3.21400800         | -1.68782200 | 0.09252700  |
|           | Cl | -2.93425200        | 0.21669000  | 0.01272800  |
| Energy:   |    | -802.72421166 a.u. |             |             |

|           |   |             |             |             |
|-----------|---|-------------|-------------|-------------|
|           | C | -4.89311400 | 0.37446100  | -0.01693000 |
|           | C | -3.95306500 | 1.26507600  | -0.43718400 |
|           | C | -2.56554600 | 0.98048900  | -0.32238700 |
|           | C | -3.16632000 | -1.13244400 | 0.66638900  |
|           | C | -4.48918200 | -0.85954900 | 0.54869000  |
|           | H | -5.94496300 | 0.60650200  | -0.11208200 |
|           | H | -4.20762800 | 2.21887800  | -0.87311500 |
|           | C | -0.81566100 | -0.63155100 | 0.42709600  |
|           | H | -2.75618200 | -2.03495200 | 1.08985100  |
|           | H | -5.21366100 | -1.58366700 | 0.88860400  |
|           | C | 0.09871400  | 0.31840900  | -0.12840200 |
|           | C | -0.37743900 | 1.51137100  | -0.62979300 |
| <b>9b</b> | H | 0.33891500  | 2.24243800  | -0.98570500 |
|           | N | -2.21477000 | -0.24149700 | 0.23796800  |
|           | N | -1.66536500 | 1.85847600  | -0.73424900 |
|           | O | -0.57335800 | -1.64955300 | 1.04126300  |
|           | C | 1.54356200  | 0.03866400  | -0.09714300 |
|           | C | 2.01305200  | -1.25426600 | -0.64334200 |
|           | C | 3.71125100  | 0.75162800  | 0.37212900  |
|           | C | 4.22107900  | -0.44873000 | -0.00421300 |
|           | H | 5.27187800  | -0.69357100 | 0.04198100  |
|           | O | 1.33805200  | -2.08800500 | -1.21874800 |
|           | N | 2.35712800  | 0.96247000  | 0.32684900  |
|           | N | 3.38312300  | -1.41818900 | -0.47473800 |
|           | H | 3.75283200  | -2.29371100 | -0.81518700 |

|         |   |                    |            |            |
|---------|---|--------------------|------------|------------|
|         | C | 4.55799800         | 1.88111500 | 0.87674300 |
|         | H | 4.43257900         | 2.76482000 | 0.24857700 |
|         | H | 4.26149800         | 2.16195900 | 1.88860900 |
|         | H | 5.61439300         | 1.61491200 | 0.88763700 |
| Energy: |   | -871.17553776 a.u. |            |            |

|            |   |                    |             |             |
|------------|---|--------------------|-------------|-------------|
|            | C | 5.00077600         | -0.05846200 | -0.06226100 |
|            | C | 4.14706600         | -1.08731800 | -0.31862900 |
|            | C | 2.74015600         | -0.92468200 | -0.19907900 |
|            | C | 3.14483800         | 1.35846800  | 0.45536600  |
|            | C | 4.48580300         | 1.20020000  | 0.33393400  |
|            | H | 6.06859600         | -0.19922500 | -0.15847700 |
|            | H | 4.48765700         | -2.06546000 | -0.62167900 |
|            | C | 0.85275900         | 0.60296500  | 0.37011300  |
|            | H | 2.65442100         | 2.26947300  | 0.75793100  |
|            | H | 5.14037600         | 2.03268000  | 0.54200700  |
|            | C | 0.02698400         | -0.50201300 | -0.00949900 |
|            | C | 0.61050700         | -1.70307000 | -0.35237000 |
|            | H | -0.03541400        | -2.54433100 | -0.57464100 |
|            | N | 2.27913100         | 0.32678200  | 0.19166300  |
| <b>9b'</b> | N | 1.92512800         | -1.93567700 | -0.44999400 |
|            | O | 0.52092100         | 1.67355300  | 0.83610700  |
|            | C | -1.43737300        | -0.36105100 | 0.03791100  |
|            | C | -2.05284500        | 0.78287900  | -0.66660000 |
|            | C | -3.50534900        | -1.17852700 | 0.67922600  |
|            | C | -4.17623800        | -0.11090300 | 0.16759900  |
|            | O | -1.48852800        | 1.58547500  | -1.38564000 |
|            | N | -2.14790100        | -1.28387000 | 0.62106700  |
|            | N | -3.43306800        | 0.84366900  | -0.46699100 |
|            | H | -3.88680500        | 1.62673100  | -0.91689700 |
|            | H | -4.03639100        | -1.97406300 | 1.18111800  |
|            | C | -5.65380400        | 0.09435400  | 0.24883300  |
|            | H | -5.89295900        | 1.00656100  | 0.80068300  |
|            | H | -6.09475400        | 0.18555200  | -0.74676900 |
|            | H | -6.12657200        | -0.74350600 | 0.75550000  |
| Energy:    |   | -871.17788807 a.u. |             |             |

|           |   |            |             |             |
|-----------|---|------------|-------------|-------------|
|           | C | 5.91977700 | -0.71993300 | 0.10512800  |
|           | C | 4.93917900 | -1.45902300 | -0.48299300 |
|           | C | 3.57395800 | -1.07550000 | -0.39308800 |
|           | C | 4.27927100 | 0.81814400  | 0.91864900  |
|           | C | 5.58138200 | 0.45220000  | 0.82425000  |
|           | H | 6.95405400 | -1.02536900 | 0.02601400  |
| <b>9e</b> | H | 5.14356800 | -2.36016800 | -1.04041200 |
|           | C | 1.91544100 | 0.56035900  | 0.49699300  |
|           | H | 3.91695600 | 1.68403100  | 1.44876300  |
|           | H | 6.33919300 | 1.05654700  | 1.29880900  |
|           | C | 0.96430700 | -0.22054300 | -0.23208300 |
|           | C | 1.37284400 | -1.36850600 | -0.87735700 |
|           | H | 0.62377100 | -1.97797300 | -1.36909000 |

|         |                     |             |             |
|---------|---------------------|-------------|-------------|
| N       | 3.28789800          | 0.08099400  | 0.32158300  |
| N       | 2.63348600          | -1.80636500 | -0.96990100 |
| O       | 1.71684400          | 1.50046400  | 1.23795500  |
| C       | -0.45356300         | 0.17654100  | -0.22845400 |
| C       | -0.77797100         | 1.57912300  | -0.62963100 |
| O       | 0.02332100          | 2.38196800  | -1.06756300 |
| N       | -1.35767900         | -0.71067700 | 0.03170800  |
| N       | -2.11977600         | 1.88081700  | -0.50958400 |
| H       | -2.37314600         | 2.82291800  | -0.77150900 |
| C       | -2.69320900         | -0.36104800 | 0.03845600  |
| C       | -3.10315300         | 0.96346100  | -0.20767100 |
| C       | -4.45645500         | 1.29283500  | -0.15350700 |
| H       | -4.77277200         | 2.31148600  | -0.33940300 |
| C       | -5.38747700         | 0.30983600  | 0.13485900  |
| H       | -6.43596400         | 0.57634400  | 0.17225800  |
| C       | -5.00950300         | -1.01830400 | 0.37851300  |
| C       | -3.65949900         | -1.33055100 | 0.32727700  |
| H       | -3.31029400         | -2.33748400 | 0.51543600  |
| C       | -6.03795900         | -2.07519800 | 0.69069200  |
| H       | -6.01440400         | -2.88144900 | -0.04500000 |
| H       | -5.85946400         | -2.52614700 | 1.66873500  |
| H       | -7.04453900         | -1.65892900 | 0.69542400  |
| Energy: | -1024.87725367 a.u. |             |             |

|   |             |             |             |
|---|-------------|-------------|-------------|
| C | -6.01798000 | -0.41474800 | -0.10121200 |
| C | -5.08802200 | -1.27561700 | 0.39641600  |
| C | -3.69911700 | -0.98636900 | 0.31559600  |
| C | -4.27768100 | 1.06914000  | -0.80009100 |
| C | -5.60211900 | 0.79188500  | -0.71502300 |
| H | -7.07110600 | -0.64979400 | -0.03068000 |
| H | -5.35214400 | -2.20790400 | 0.87141800  |
| C | -1.93452500 | 0.60120600  | -0.44968800 |
| H | -3.85844400 | 1.95229200  | -1.25431900 |
| H | -6.31868900 | 1.49172300  | -1.11689300 |
| C | -1.03502300 | -0.31345100 | 0.18300800  |
| C | -1.52004200 | -1.48423800 | 0.72588700  |
| H | -0.81233800 | -2.19094100 | 1.14313900  |
| N | -3.33652700 | 0.20869400  | -0.29342700 |
| N | -2.80873000 | -1.83553000 | 0.80242600  |
| O | -1.67591500 | 1.59140900  | -1.10174200 |
| C | 0.40868200  | -0.02341200 | 0.18888300  |
| C | 0.84458300  | 1.30228300  | 0.71831500  |
| O | 0.11492100  | 2.12110700  | 1.24289100  |
| N | 1.24107200  | -0.94520800 | -0.17409400 |
| N | 2.20716800  | 1.51007900  | 0.60793600  |
| H | 2.53391500  | 2.40049000  | 0.95562000  |
| C | 2.59670500  | -0.69790200 | -0.16903100 |
| C | 3.11330200  | 0.55708300  | 0.20119400  |
| C | 4.48916100  | 0.79775100  | 0.16396500  |
| H | 4.86582100  | 1.77225600  | 0.45111100  |

9e'

|         |   |                     |             |             |
|---------|---|---------------------|-------------|-------------|
|         | C | 5.36742000          | -0.19920700 | -0.23188500 |
|         | C | 4.85020600          | -1.45549200 | -0.59607700 |
|         | C | 3.49414200          | -1.69814800 | -0.56737900 |
|         | H | 3.08546400          | -2.65768900 | -0.85213300 |
|         | H | 5.52998000          | -2.23869000 | -0.90544800 |
|         | C | 6.85065900          | 0.05117800  | -0.27983600 |
|         | H | 7.10221900          | 1.04569400  | 0.08538500  |
|         | H | 7.39150400          | -0.67822800 | 0.32608100  |
|         | H | 7.22877900          | -0.03723900 | -1.30060500 |
| Energy: |   | -1024.87843303 a.u. |             |             |

|         |    |                     |             |             |
|---------|----|---------------------|-------------|-------------|
|         | C  | 6.17859600          | -0.93999700 | 0.12449900  |
|         | C  | 5.16714100          | -1.60690100 | -0.49748800 |
|         | C  | 3.82447000          | -1.15177900 | -0.41207500 |
|         | C  | 4.61305400          | 0.66058200  | 0.96441900  |
|         | C  | 5.89470400          | 0.22690400  | 0.87422800  |
|         | H  | 7.19565300          | -1.29922900 | 0.04871700  |
|         | H  | 5.32965000          | -2.50120400 | -1.07913200 |
|         | C  | 2.24445100          | 0.54365500  | 0.50800000  |
|         | H  | 4.29130100          | 1.52868200  | 1.51659200  |
|         | H  | 6.67764900          | 0.77469100  | 1.37585100  |
|         | C  | 1.26247000          | -0.16361600 | -0.25450700 |
|         | C  | 1.61737900          | -1.31341500 | -0.93011400 |
|         | H  | 0.84314100          | -1.86735700 | -1.44789800 |
|         | N  | 3.59173100          | -0.00361400 | 0.33353700  |
|         | N  | 2.85303300          | -1.81357900 | -1.02235600 |
| 9f      | O  | 2.08643800          | 1.46935600  | 1.27606700  |
|         | C  | -0.13172700         | 0.30448600  | -0.25142200 |
|         | C  | -0.38269100         | 1.73896300  | -0.59200200 |
|         | O  | 0.45893100          | 2.51947400  | -0.98859500 |
|         | N  | -1.08343000         | -0.54743100 | -0.04669600 |
|         | N  | -1.71055400         | 2.10277000  | -0.46638600 |
|         | H  | -1.91322600         | 3.06769900  | -0.68614500 |
|         | C  | -2.39824200         | -0.13058200 | -0.03998700 |
|         | C  | -2.74071500         | 1.22298600  | -0.22203100 |
|         | C  | -4.07758200         | 1.62198400  | -0.16650300 |
|         | H  | -4.33776800         | 2.66358700  | -0.30338400 |
|         | C  | -5.06801200         | 0.68420100  | 0.05911700  |
|         | H  | -6.10437300         | 0.98449300  | 0.10149600  |
|         | C  | -4.72694800         | -0.65893600 | 0.23221100  |
|         | C  | -3.41194600         | -1.07006100 | 0.18774500  |
|         | H  | -3.13563700         | -2.10379000 | 0.32982400  |
|         | Cl | -5.99713000         | -1.83153400 | 0.51488600  |
| Energy: |    | -1445.17656399 a.u. |             |             |

|     |   |            |             |             |
|-----|---|------------|-------------|-------------|
|     | C | 6.35985800 | -0.40849900 | 0.12410100  |
|     | C | 5.43287100 | -1.27494400 | -0.37025900 |
| 9f' | C | 4.04404400 | -0.98586300 | -0.29847500 |
|     | C | 4.61505000 | 1.07985200  | 0.80134400  |
|     | C | 5.94026900 | 0.80293100  | 0.72483900  |



|         |                     |             |             |
|---------|---------------------|-------------|-------------|
| H       | 7.41346100          | -0.64330000 | 0.06070600  |
| H       | 5.70008800          | -2.21124700 | -0.83547900 |
| C       | 2.27414800          | 0.60617900  | 0.44365200  |
| H       | 4.19311300          | 1.96662300  | 1.24589700  |
| H       | 6.65431900          | 1.50694800  | 1.12382300  |
| C       | 1.37896900          | -0.31504200 | -0.18558900 |
| C       | 1.86780500          | -1.49152900 | -0.71508200 |
| H       | 1.16289800          | -2.20276700 | -1.12939800 |
| N       | 3.67752400          | 0.21382700  | 0.29783400  |
| N       | 3.15616300          | -1.84088000 | -0.78233200 |
| O       | 2.01070800          | 1.60079200  | 1.08656100  |
| C       | -0.06365600         | -0.02754200 | -0.20095900 |
| C       | -0.49983600         | 1.30066800  | -0.72869200 |
| O       | 0.22887900          | 2.11963100  | -1.25050300 |
| N       | -0.89770000         | -0.95215400 | 0.15024800  |
| N       | -1.86414200         | 1.50932800  | -0.62076900 |
| H       | -2.18922900         | 2.40124600  | -0.96636300 |
| C       | -2.25372000         | -0.70716600 | 0.13741500  |
| C       | -2.76998000         | 0.55255800  | -0.22652600 |
| C       | -4.14453000         | 0.79481500  | -0.19593000 |
| H       | -4.54176700         | 1.76125600  | -0.47223100 |
| C       | -4.98945200         | -0.22832700 | 0.19062600  |
| C       | -4.50713900         | -1.48836200 | 0.55126800  |
| C       | -3.14588900         | -1.71474900 | 0.52347900  |
| H       | -2.73441800         | -2.67425800 | 0.80299300  |
| H       | -5.19618100         | -2.26400900 | 0.84841200  |
| Cl      | -6.71263400         | 0.06561200  | 0.22747300  |
| Energy: | -1445.17745639 a.u. |             |             |

|   |             |             |             |
|---|-------------|-------------|-------------|
| C | 5.45313000  | 0.22385900  | 0.73910000  |
| C | 3.51841900  | -0.89694000 | -0.34248600 |
| C | 4.28764900  | 0.82654800  | 1.01005400  |
| H | 6.42974200  | 0.51382200  | 1.08320400  |
| C | 1.84524600  | 0.65861900  | 0.56933200  |
| H | 4.09843600  | 1.69643100  | 1.61439900  |
| C | 0.92712300  | -0.13359300 | -0.21310500 |
| C | 1.37652300  | -1.23439000 | -0.90113600 |
| H | 0.66125300  | -1.84199300 | -1.44061200 |
| N | 3.20209100  | 0.20833100  | 0.40246300  |
| N | 2.66603500  | -1.63984200 | -0.98367600 |
| O | 1.61216800  | 1.56989700  | 1.33474600  |
| C | -0.50364900 | 0.22272300  | -0.21700600 |
| C | -0.85847000 | 1.62178900  | -0.60116100 |
| O | -0.07035700 | 2.45051100  | -1.01430400 |
| N | -1.38494900 | -0.69009600 | 0.02778900  |
| N | -2.20853800 | 1.88753900  | -0.49301400 |
| H | -2.48357500 | 2.82689300  | -0.74275400 |
| C | -2.72934600 | -0.37396000 | 0.02835500  |
| C | -3.17044300 | 0.94211100  | -0.20887500 |
| C | -4.53217700 | 1.23639400  | -0.16296800 |

10e

|         |   |                     |             |             |
|---------|---|---------------------|-------------|-------------|
|         | H | -4.87296600         | 2.24836900  | -0.34176600 |
|         | C | -5.43986600         | 0.22730000  | 0.10869200  |
|         | H | -6.49507700         | 0.46665000  | 0.13990300  |
|         | C | -5.03034000         | -1.09309900 | 0.34367900  |
|         | C | -3.67251500         | -1.37050700 | 0.30057100  |
|         | H | -3.29929400         | -2.36996000 | 0.48229600  |
|         | C | -6.03410400         | -2.17846800 | 0.63786600  |
|         | H | -5.98675700         | -2.97514900 | -0.10703100 |
|         | H | -5.84962400         | -2.63624400 | 1.61157800  |
|         | H | -7.05059700         | -1.78713600 | 0.64178800  |
|         | S | 5.24802600          | -1.17104900 | -0.29531000 |
| Energy: |   | -1345.65016193 a.u. |             |             |

|             |   |                     |             |             |
|-------------|---|---------------------|-------------|-------------|
|             | C | 3.63231500          | -0.81261700 | -0.27931700 |
|             | C | 1.86144900          | 0.69937100  | 0.51367900  |
|             | C | 0.99389400          | -0.22727300 | -0.17295400 |
|             | C | 1.51407700          | -1.35353400 | -0.76267700 |
|             | H | 0.83857400          | -2.05937500 | -1.22881500 |
|             | N | 3.24539600          | 0.33340600  | 0.36387600  |
|             | N | 2.82877100          | -1.67236700 | -0.83091000 |
|             | O | 1.57213800          | 1.66089600  | 1.19383800  |
|             | C | -0.45910100         | 0.02345100  | -0.18363100 |
|             | C | -0.92188800         | 1.34748800  | -0.69158900 |
|             | O | -0.20556500         | 2.19276200  | -1.19213100 |
|             | N | -1.26915300         | -0.92317300 | 0.16246600  |
|             | N | -2.28971000         | 1.52032000  | -0.58961800 |
|             | H | -2.63568200         | 2.40921600  | -0.92235900 |
|             | C | -2.63064600         | -0.70747700 | 0.15437200  |
| <b>10e'</b> | C | -3.17473400         | 0.53999300  | -0.20158300 |
|             | C | -4.55616200         | 0.74707000  | -0.16873700 |
|             | H | -4.95493100         | 1.71598400  | -0.44466300 |
|             | C | -5.41210300         | -0.27596600 | 0.20899000  |
|             | C | -4.86704700         | -1.52458100 | 0.55874500  |
|             | C | -3.50549000         | -1.73442600 | 0.53413400  |
|             | H | -3.07537200         | -2.68783300 | 0.80759100  |
|             | H | -5.52961900         | -2.32785700 | 0.85345700  |
|             | C | -6.90079500         | -0.06054900 | 0.25556700  |
|             | H | -7.17680600         | 0.92171900  | -0.12479300 |
|             | H | -7.42502100         | -0.81267600 | -0.33672900 |
|             | H | -7.27455300         | -0.14102900 | 1.27873400  |
|             | S | 5.37823500          | -0.95604800 | -0.24019700 |
|             | C | 4.29046400          | 1.08305800  | 0.88899800  |
|             | H | 4.04573800          | 1.99075100  | 1.41237800  |
|             | C | 5.49340700          | 0.54234000  | 0.65340600  |
|             | H | 6.45036600          | 0.93321300  | 0.94957500  |
| Energy:     |   | -1345.65136864 a.u. |             |             |

|            |   |            |             |             |
|------------|---|------------|-------------|-------------|
| <b>10f</b> | C | 3.77139100 | -0.97752000 | -0.35449300 |
|            | C | 2.17655200 | 0.64365200  | 0.58136900  |
|            | C | 1.22527400 | -0.07645200 | -0.23075300 |

|         |                     |             |             |
|---------|---------------------|-------------|-------------|
| C       | 1.62093700          | -1.18380600 | -0.94299700 |
| H       | 0.87930000          | -1.73732200 | -1.50463200 |
| N       | 3.50811500          | 0.12375100  | 0.41596600  |
| N       | 2.88611800          | -1.65581200 | -1.02399600 |
| O       | 1.98428000          | 1.54548100  | 1.36867400  |
| C       | -0.18280400         | 0.35506700  | -0.23732400 |
| C       | -0.46148900         | 1.78690400  | -0.56381200 |
| O       | 0.36927800          | 2.58920600  | -0.93950900 |
| N       | -1.11446600         | -0.52013200 | -0.04540900 |
| N       | -1.79820900         | 2.11949800  | -0.44968600 |
| H       | -2.02054000         | 3.08230500  | -0.65979900 |
| C       | -2.43882600         | -0.13246800 | -0.04502800 |
| C       | -2.80985000         | 1.21430300  | -0.22051700 |
| C       | -4.15587000         | 1.58248900  | -0.17279600 |
| H       | -4.43870300         | 2.61884100  | -0.30432400 |
| C       | -5.12628100         | 0.62094200  | 0.03858800  |
| H       | -6.16944800         | 0.89754700  | 0.07495000  |
| C       | -4.75664700         | -0.71545100 | 0.20575400  |
| C       | -3.43232300         | -1.09626300 | 0.16869900  |
| H       | -3.13357900         | -2.12440200 | 0.30584900  |
| Cl      | -6.00190600         | -1.91781500 | 0.47100000  |
| S       | 5.48103100          | -1.34895400 | -0.29750700 |
| C       | 4.61921800          | 0.66468000  | 1.05066700  |
| H       | 4.47182100          | 1.52763600  | 1.67624700  |
| C       | 5.75208700          | 0.00443100  | 0.77542000  |
| H       | 6.73947600          | 0.22983600  | 1.13670800  |
| Energy: | -1765.94932553 a.u. |             |             |

|   |             |             |             |
|---|-------------|-------------|-------------|
| C | 3.97305000  | -0.81643400 | -0.26577000 |
| C | 2.20143600  | 0.70417100  | 0.50731900  |
| C | 1.33551200  | -0.22700700 | -0.17536600 |
| C | 1.85642100  | -1.36012900 | -0.75336400 |
| H | 1.18166900  | -2.06887600 | -1.21625600 |
| N | 3.58517800  | 0.33507800  | 0.36640900  |
| N | 3.16974000  | -1.68008000 | -0.81394400 |
| O | 1.90968100  | 1.67058700  | 1.17905900  |
| C | -0.11578200 | 0.02512100  | -0.19393300 |
| C | -0.57592800 | 1.35296700  | -0.69970600 |
| O | 0.14133100  | 2.19618100  | -1.19828800 |
| N | -0.92957900 | -0.92189000 | 0.14123900  |
| N | -1.94483200 | 1.53039600  | -0.59901500 |
| H | -2.28688300 | 2.42153400  | -0.93016400 |
| C | -2.29078600 | -0.70483000 | 0.12622700  |
| C | -2.83172700 | 0.54852200  | -0.22342000 |
| C | -4.21126400 | 0.76092000  | -0.19651900 |
| H | -4.62794000 | 1.72222900  | -0.46184400 |
| C | -5.03586200 | -0.28502800 | 0.17240600  |
| C | -4.52849300 | -1.53928500 | 0.51908700  |
| C | -3.16268800 | -1.73625300 | 0.49494500  |
| H | -2.73197400 | -2.69032100 | 0.76385800  |

10f

|         |    |                     |             |             |
|---------|----|---------------------|-------------|-------------|
|         | H  | -5.20226600         | -2.33305500 | 0.80307000  |
|         | Cl | -6.76462700         | -0.02805300 | 0.20504100  |
|         | S  | 5.71691900          | -0.96268000 | -0.21892700 |
|         | C  | 4.62924200          | 1.08743200  | 0.88965400  |
|         | H  | 4.38424200          | 1.99983200  | 1.40470300  |
|         | C  | 5.83199200          | 0.54251200  | 0.66270100  |
|         | H  | 6.78872300          | 0.93369000  | 0.95919800  |
| Energy: |    | -1765.95024156 a.u. |             |             |

|            |   |                     |             |             |
|------------|---|---------------------|-------------|-------------|
|            | C | 1.61732400          | -1.55356500 | -0.38847300 |
|            | C | 0.20923000          | 0.37069800  | 0.18236000  |
|            | C | -0.86441100         | -0.53198300 | -0.17543500 |
|            | C | -0.59025300         | -1.83246900 | -0.52439800 |
|            | H | -1.41692100         | -2.49783000 | -0.73831300 |
|            | N | 0.64361800          | -2.38057000 | -0.64202500 |
|            | O | 0.13446900          | 1.49439500  | 0.63730400  |
|            | C | -2.25556500         | -0.05284800 | -0.10713400 |
|            | C | -2.59640800         | 1.18479000  | -0.84452300 |
|            | C | -4.45127600         | -0.35721600 | 0.61022500  |
|            | C | -4.82995400         | 0.82209100  | 0.05674300  |
|            | H | -5.83211500         | 1.21933100  | 0.12127600  |
|            | O | -1.86718900         | 1.80620700  | -1.59577600 |
|            | N | -3.14372100         | -0.76490700 | 0.52376200  |
|            | N | -3.91458400         | 1.56851700  | -0.62862700 |
|            | H | -4.19365900         | 2.41839400  | -1.09630600 |
| <b>11b</b> | C | -5.39225000         | -1.25241400 | 1.35897600  |
|            | H | -5.44504400         | -2.23530100 | 0.88708400  |
|            | H | -5.04445300         | -1.40591500 | 2.38178200  |
|            | H | -6.39796500         | -0.83493500 | 1.39502700  |
|            | C | 5.04883700          | -0.48793600 | 0.00634200  |
|            | H | 5.76267700          | -1.26902000 | -0.21479600 |
|            | C | 3.68377300          | -0.70598300 | -0.08826600 |
|            | C | 2.75984700          | 0.31122200  | 0.19769100  |
|            | C | 3.17112300          | 1.57581700  | 0.58797200  |
|            | H | 2.44595900          | 2.34276700  | 0.80470800  |
|            | C | 4.54272000          | 1.79187500  | 0.68335100  |
|            | H | 4.90174700          | 2.76570500  | 0.98533000  |
|            | C | 5.46275100          | 0.78111600  | 0.39850300  |
|            | H | 6.52093200          | 0.98647100  | 0.48335800  |
|            | N | 2.95193700          | -1.83123100 | -0.44303000 |
|            | H | 3.30468200          | -2.73599200 | -0.69961700 |
|            | N | 1.48603500          | -0.24004500 | -0.00513200 |
| Energy:    |   | -1002.81312197 a.u. |             |             |

|             |   |             |             |             |
|-------------|---|-------------|-------------|-------------|
|             | C | 1.79863900  | -1.58636500 | -0.19800000 |
|             | C | 0.24800400  | 0.26780300  | 0.21347500  |
| <b>11b'</b> | C | -0.75465400 | -0.75336500 | -0.00375400 |
|             | C | -0.38009500 | -2.05722400 | -0.22171300 |
|             | H | -1.15270700 | -2.80742900 | -0.33166900 |
|             | N | 0.89261300  | -2.51276900 | -0.32463600 |

|         |                     |             |             |
|---------|---------------------|-------------|-------------|
| O       | 0.09088700          | 1.42618300  | 0.54424700  |
| C       | -2.17923700         | -0.38653600 | 0.07035100  |
| C       | -2.65525900         | 0.72914300  | -0.77427700 |
| C       | -4.31010500         | -0.77943600 | 0.88472100  |
| C       | -4.84260400         | 0.29354200  | 0.24050200  |
| O       | -2.01526000         | 1.32962900  | -1.61683700 |
| N       | -2.98626000         | -1.09717300 | 0.80466200  |
| N       | -4.00027400         | 1.02538800  | -0.54835300 |
| H       | -4.35658700         | 1.79695800  | -1.09526600 |
| C       | 5.13611400          | -0.20465100 | -0.05715000 |
| H       | 5.90753300          | -0.94429100 | -0.21975800 |
| C       | 3.79276600          | -0.54384800 | -0.07166200 |
| C       | 2.79369000          | 0.41971500  | 0.13760100  |
| C       | 3.10629400          | 1.74985300  | 0.36927500  |
| H       | 2.32459500          | 2.47392900  | 0.52961300  |
| C       | 4.45640700          | 2.08780500  | 0.38389100  |
| H       | 4.73919200          | 3.11581700  | 0.56183600  |
| C       | 5.45092600          | 1.13053400  | 0.17484500  |
| H       | 6.48957700          | 1.43058800  | 0.19317300  |
| N       | 3.15037600          | -1.75789700 | -0.27291600 |
| H       | 3.57190900          | -2.65327700 | -0.44435800 |
| N       | 1.56646400          | -0.25337700 | 0.04559300  |
| H       | -4.92546000         | -1.40606900 | 1.51361200  |
| C       | -6.26853300         | 0.73008900  | 0.33162500  |
| H       | -6.34458700         | 1.73573200  | 0.75204400  |
| H       | -6.73952200         | 0.74778800  | -0.65422000 |
| H       | -6.83351800         | 0.05221700  | 0.96689100  |
| Energy: | -1002.81542190 a.u. |             |             |

|   |             |             |             |
|---|-------------|-------------|-------------|
| N | -4.00821000 | 1.81934300  | 0.55830900  |
| H | -4.36489500 | 2.69146700  | 0.90638700  |
| O | -1.17013600 | -1.40595200 | -0.74773400 |
| N | -2.53884200 | 0.26347900  | 0.01855300  |
| N | 2.75548600  | -1.77482500 | 0.81440900  |
| H | 2.96727600  | -2.67747800 | 1.21517900  |
| N | -1.71206800 | 2.28549300  | 0.98143800  |
| N | 2.12067700  | 0.74008800  | -0.11008500 |
| O | 0.63211300  | -2.01846600 | 1.58031200  |
| C | 6.82816400  | 1.61518400  | -1.26854500 |
| H | 6.42262400  | 2.57966500  | -1.57038600 |
| H | 7.60664400  | 1.79801900  | -0.52468500 |
| H | 7.31389700  | 1.16989500  | -2.13943700 |
| C | -6.49268100 | -0.60849700 | -0.77202500 |
| H | -7.54547200 | -0.77782600 | -0.95107900 |
| C | -5.56968000 | -1.59552100 | -1.12303100 |
| H | -5.92111300 | -2.51502500 | -1.56956700 |
| C | -4.20474200 | -1.42383600 | -0.91228300 |
| H | -3.47766700 | -2.17326900 | -1.17831400 |
| C | -3.80331800 | -0.22828800 | -0.33762400 |
| C | -4.73009400 | 0.76516800  | 0.01460600  |

11e

|         |                     |             |             |
|---------|---------------------|-------------|-------------|
| C       | -6.08861600         | 0.59153400  | -0.19585900 |
| H       | -6.80479900         | 1.35427000  | 0.07587100  |
| C       | -2.67766200         | 1.52000000  | 0.55827100  |
| C       | -0.20300300         | 0.47660900  | 0.38526800  |
| C       | -0.48149100         | 1.72896500  | 0.87822600  |
| H       | 0.33763200          | 2.34173300  | 1.23242100  |
| C       | 1.18300700          | -0.02055200 | 0.35430300  |
| C       | 3.76922200          | -0.99487400 | 0.30247500  |
| C       | 3.42698700          | 0.29513100  | -0.13859300 |
| C       | 4.43179500          | 1.13069400  | -0.64573600 |
| H       | 4.13546600          | 2.11585200  | -0.98046800 |
| C       | 5.74961600          | 0.71581200  | -0.72327700 |
| C       | 6.06109000          | -0.58103900 | -0.28043200 |
| H       | 7.08567600          | -0.92723400 | -0.33506100 |
| C       | 5.09428300          | -1.42917400 | 0.22392600  |
| H       | 5.35660400          | -2.42420100 | 0.56089100  |
| C       | -1.26112300         | -0.34818400 | -0.15809300 |
| C       | 1.44708200          | -1.35839300 | 0.96496800  |
| Energy: | -1156.51527369 a.u. |             |             |

|   |             |             |             |
|---|-------------|-------------|-------------|
| N | -4.14957800 | 1.75339900  | 0.36655100  |
| H | -4.55576400 | 2.63930400  | 0.60974800  |
| O | -1.13256700 | -1.43486000 | -0.58127700 |
| N | -2.59273000 | 0.23359500  | -0.00512900 |
| N | 2.83847000  | -1.35552900 | 0.91460800  |
| H | 3.11449600  | -2.18329600 | 1.42349800  |
| N | -1.88167800 | 2.40739700  | 0.67901700  |
| N | 2.02215000  | 0.96700300  | -0.31615300 |
| O | 0.75096900  | -1.62824000 | 1.76375900  |
| C | -6.49419600 | -0.96613400 | -0.60444000 |
| H | -7.53646800 | -1.21906400 | -0.74151300 |
| C | -5.51600600 | -1.93218200 | -0.84778500 |
| H | -5.81493500 | -2.91961600 | -1.17032000 |
| C | -4.16198500 | -1.65435900 | -0.68523200 |
| H | -3.39310800 | -2.38645000 | -0.86944300 |
| C | -3.82847300 | -0.37455000 | -0.27098600 |
| C | -4.81089500 | 0.59767000  | -0.02680900 |
| C | -6.15838300 | 0.31821300  | -0.18847500 |
| H | -6.91704000 | 1.06482500  | 0.00012600  |
| C | -2.80282300 | 1.53764700  | 0.37590100  |
| C | -0.26987300 | 0.63341300  | 0.27904300  |
| C | -0.61969900 | 1.91827900  | 0.61814900  |
| H | 0.16404800  | 2.62002600  | 0.87348800  |
| C | 1.14453400  | 0.22141300  | 0.27335900  |
| C | 3.78931100  | -0.59381800 | 0.27384200  |
| C | 3.35149600  | 0.60111700  | -0.32491600 |
| C | 4.29686200  | 1.40979300  | -0.96995100 |
| H | 3.94780200  | 2.32334700  | -1.43085600 |
| C | 5.62396900  | 1.04091500  | -1.01596800 |
| C | 6.06218700  | -0.15581700 | -0.42153500 |

11e'

|         |   |                     |             |             |
|---------|---|---------------------|-------------|-------------|
|         | C | 5.13552800          | -0.96442700 | 0.21856200  |
|         | H | 5.45120400          | -1.89106200 | 0.68313300  |
|         | C | -1.28177700         | -0.31689500 | -0.13053600 |
|         | C | 1.50736300          | -1.00402300 | 1.04523800  |
|         | C | 7.51575800          | -0.54168900 | -0.48008900 |
|         | H | 7.87217500          | -0.57198400 | -1.51145900 |
|         | H | 8.13496100          | 0.18434300  | 0.05131500  |
|         | H | 7.69026200          | -1.52000900 | -0.03478000 |
|         | H | 6.34133000          | 1.67597300  | -1.51928600 |
| Energy: |   | -1156.51611363 a.u. |             |             |

|                 |   |                    |             |             |
|-----------------|---|--------------------|-------------|-------------|
|                 | N | -1.97191400        | 1.73769500  | -0.49981000 |
|                 | N | -2.51326800        | -0.50470900 | 0.07274800  |
|                 | C | -4.74886600        | -1.28721600 | -0.11158500 |
|                 | H | -5.45999900        | -2.09136000 | -0.00082700 |
|                 | C | -3.44376900        | -1.49995000 | 0.19893700  |
|                 | H | -3.03885300        | -2.43217400 | 0.55860600  |
|                 | C | -5.14720800        | -0.01260400 | -0.57281400 |
|                 | H | -6.18256600        | 0.17272000  | -0.82366200 |
|                 | C | -4.22140300        | 0.98115100  | -0.69860000 |
|                 | H | -4.47211700        | 1.97218300  | -1.04408300 |
|                 | C | -2.86049600        | 0.75575100  | -0.37303200 |
|                 | C | -1.11579300        | -0.85475900 | 0.44263300  |
|                 | O | -0.91009900        | -1.98197600 | 0.82056400  |
| Amide (derived  | C | 3.80999600         | 0.13827200  | -0.94595600 |
| from            | H | 2.99453800         | -0.51552500 | -1.24649200 |
| ethylenediamine | H | 4.25689000         | 0.53471700  | -1.85865300 |
| A)              | C | 4.85863100         | -0.66986700 | -0.17981700 |
|                 | H | 4.41774600         | -0.99700400 | 0.76673100  |
|                 | H | 5.70474100         | -0.02004100 | 0.05620700  |
|                 | O | 1.72228100         | -0.99356100 | 0.87760000  |
|                 | O | 1.81108400         | 2.30215200  | 1.20099300  |
|                 | C | 1.21659400         | 0.06710100  | 0.56608700  |
|                 | C | 2.12062400         | 1.32066900  | 0.54074200  |
|                 | C | -0.21579900        | 0.25471900  | 0.28274900  |
|                 | C | -0.71127500        | 1.47375300  | -0.17338800 |
|                 | H | -0.02826700        | 2.30643100  | -0.27005300 |
|                 | N | 5.34359200         | -1.75876500 | -1.03068600 |
|                 | H | 6.18423700         | -2.16583900 | -0.64133000 |
|                 | H | 4.65647400         | -2.50303800 | -1.06814600 |
|                 | N | 3.26783600         | 1.24828900  | -0.17298100 |
|                 | H | 3.84990400         | 2.06631700  | -0.06219800 |
| Energy:         |   | -909.51096090 a.u. |             |             |

|                 |   |             |             |             |
|-----------------|---|-------------|-------------|-------------|
| Imine (derived  | N | -2.15175200 | 1.75233300  | 0.02307400  |
| from            | N | -2.75359000 | -0.54282600 | -0.01860500 |
| ethylenediamine | C | -5.04426900 | -1.18198000 | -0.01962100 |
| A)              | H | -5.78588000 | -1.96600100 | -0.02819400 |
|                 | C | -3.72732600 | -1.50813800 | -0.02778000 |
|                 | H | -3.34087300 | -2.51429400 | -0.04181300 |

|         |                    |             |             |
|---------|--------------------|-------------|-------------|
| C       | -5.41792000        | 0.18267500  | 0.00035400  |
| H       | -6.46376500        | 0.45729600  | 0.00675000  |
| C       | -4.45461300        | 1.14547900  | 0.01238300  |
| H       | -4.68376800        | 2.19988000  | 0.02966600  |
| C       | -3.07653000        | 0.80400600  | 0.00488000  |
| C       | -0.40568700        | 0.05996500  | -0.03665300 |
| C       | -0.87638500        | 1.36120300  | 0.00698100  |
| H       | -0.15958600        | 2.17415100  | 0.01873400  |
| C       | -1.35345200        | -1.02303300 | -0.03326600 |
| O       | -1.17416200        | -2.21779300 | -0.02266200 |
| C       | 1.04360000         | -0.20033900 | -0.07531000 |
| C       | 1.93915500         | 0.94790400  | 0.39164700  |
| O       | 2.15479400         | 1.19818800  | 1.55000500  |
| C       | 2.95057200         | -1.57085900 | -0.45108500 |
| H       | 3.28450200         | -1.56964600 | -1.49218300 |
| H       | 3.54727700         | -0.81807900 | 0.08193500  |
| C       | 3.23663500         | -2.95249200 | 0.13591000  |
| H       | 2.83642900         | -2.99241700 | 1.15703000  |
| H       | 2.68848100         | -3.69211700 | -0.44767000 |
| O       | 2.47956400         | 1.60198200  | -0.64966800 |
| C       | 3.41879900         | 2.67004200  | -0.34971300 |
| H       | 4.07800300         | 2.69315000  | -1.21452500 |
| H       | 3.98906900         | 2.39289500  | 0.53436200  |
| C       | 2.70884500         | 3.99515400  | -0.15610000 |
| H       | 3.44599700         | 4.78653500  | -0.01094400 |
| H       | 2.10829100         | 4.24666500  | -1.03029500 |
| H       | 2.06489400         | 3.96853000  | 0.72164800  |
| N       | 1.52583600         | -1.31730300 | -0.43318900 |
| N       | 4.66928900         | -3.24774700 | 0.04159000  |
| H       | 5.18927300         | -2.69663100 | 0.71489200  |
| H       | 4.84305900         | -4.21764900 | 0.27335400  |
| Energy: | -988.14381545 a.u. |             |             |

|   |             |             |             |
|---|-------------|-------------|-------------|
| N | 2.02899200  | -0.44355900 | -0.02780500 |
| C | 3.95880900  | -1.82728400 | -0.07955600 |
| H | 4.39259300  | -2.80724500 | -0.20623800 |
| C | 2.61357200  | -1.67420800 | -0.17688700 |
| H | 1.91345900  | -2.47048700 | -0.37159300 |
| C | 4.76383800  | -0.69704100 | 0.18804700  |
| H | 5.83642700  | -0.80531700 | 0.27068200  |
| C | 4.18388500  | 0.52791300  | 0.34180300  |
| H | 4.75368600  | 1.42082100  | 0.54748800  |
| C | 2.78078700  | 0.69143900  | 0.23474600  |
| C | 0.05922900  | 0.94099100  | -0.03869800 |
| C | 0.91684800  | 1.99269400  | 0.24881400  |
| H | 0.48842400  | 2.98162000  | 0.36189800  |
| C | 0.56934100  | -0.38452600 | -0.14966600 |
| O | -0.04436300 | -1.42351000 | -0.29810900 |
| C | -1.37909300 | 1.20180200  | -0.20504000 |
| C | -2.18159100 | 0.25180000  | -1.10425800 |

Amide (derived from acetamidine B)



|         |                    |             |             |
|---------|--------------------|-------------|-------------|
| O       | -1.91862300        | 2.22260300  | 0.17443200  |
| O       | -1.88642600        | 0.26868200  | -2.28347100 |
| C       | -2.92983700        | -0.37490700 | 1.81990200  |
| H       | -1.90036400        | -0.72037600 | 1.71595900  |
| H       | -2.91865500        | 0.70629100  | 1.94869100  |
| H       | -3.37637300        | -0.83474800 | 2.69565500  |
| N       | -4.82808300        | -1.42363600 | 0.80120200  |
| H       | -5.30309000        | -1.63046600 | -0.07751100 |
| N       | 2.23482100         | 1.89605600  | 0.38582600  |
| N       | -3.28269400        | -0.42876100 | -0.65334700 |
| H       | -3.79098000        | -0.84945200 | -1.42103000 |
| C       | -3.75096900        | -0.77092900 | 0.62946600  |
| Energy: | -908.30560559 a.u. |             |             |

|                                          |                    |             |             |             |
|------------------------------------------|--------------------|-------------|-------------|-------------|
| N                                        | 2.00277000         | 1.67467600  | -0.83337000 |             |
| N                                        | 2.74253800         | -0.33934800 | 0.18557100  |             |
| C                                        | 5.05689100         | -0.69924300 | 0.59167400  |             |
| H                                        | 5.84171000         | -1.33550700 | 0.97099700  |             |
| C                                        | 3.76752000         | -1.11753800 | 0.65742700  |             |
| H                                        | 3.44486200         | -2.06005800 | 1.06919800  |             |
| C                                        | 5.34494000         | 0.56436600  | 0.02575700  |             |
| H                                        | 6.36773800         | 0.90999300  | -0.03370900 |             |
| C                                        | 4.32854100         | 1.34186400  | -0.44316100 |             |
| H                                        | 4.49247200         | 2.31323000  | -0.88366500 |             |
| C                                        | 2.98100800         | 0.90414800  | -0.37412700 |             |
| C                                        | 1.38015500         | -0.90251500 | 0.30847200  |             |
| O                                        | 1.26524600         | -1.98351200 | 0.83510900  |             |
| C                                        | -2.06735500        | 0.69457500  | -0.45285400 |             |
| O                                        | -2.72376400        | 0.79624800  | -1.45748100 |             |
| N                                        | -1.42140500        | -1.61910200 | -0.09933200 |             |
| Imine (derived<br>from<br>acetamidine B) | O                  | -2.14765500 | 1.49862900  | 0.61397300  |
|                                          | C                  | -3.14763300 | 2.55743700  | 0.57731500  |
|                                          | H                  | -3.25360800 | 2.89667400  | -0.45064800 |
|                                          | H                  | -2.71497800 | 3.35212200  | 1.18100300  |
|                                          | C                  | -4.46720100 | 2.07537700  | 1.14444700  |
|                                          | H                  | -5.18496600 | 2.89738300  | 1.14191200  |
|                                          | H                  | -4.87478500 | 1.26106200  | 0.54810100  |
|                                          | H                  | -4.34738800 | 1.72919700  | 2.17056900  |
|                                          | C                  | -3.25596800 | -2.69421000 | -1.29075100 |
|                                          | H                  | -3.24349200 | -1.99947900 | -2.13216900 |
|                                          | H                  | -2.59636000 | -3.52658600 | -1.53978300 |
|                                          | H                  | -4.26665800 | -3.05878700 | -1.12933100 |
|                                          | N                  | -3.51107700 | -1.89057200 | 0.97872300  |
|                                          | H                  | -3.00902600 | -1.42525400 | 1.73521700  |
|                                          | C                  | -2.76875200 | -2.00443000 | -0.05003200 |
|                                          | C                  | -1.03782000 | -0.41461800 | -0.23220100 |
|                                          | C                  | 0.76097000  | 1.20294100  | -0.74629500 |
|                                          | H                  | -0.00072100 | 1.86329300  | -1.14608100 |
|                                          | C                  | 0.37550400  | -0.02278400 | -0.22493000 |
| Energy:                                  | -986.94091849 a.u. |             |             |             |

|         |   |                    |             |             |
|---------|---|--------------------|-------------|-------------|
|         | O | 1.15325700         | -0.39557900 | 0.00005600  |
|         | H | 1.98624900         | 0.08318000  | -0.00011600 |
|         | C | 0.08233900         | 0.54746300  | -0.00002300 |
|         | H | 0.13664200         | 1.19307700  | -0.88455900 |
| Ethanol | H | 0.13660200         | 1.19317400  | 0.88444600  |
|         | C | -1.22163600        | -0.22292000 | -0.00001000 |
|         | H | -2.06996200        | 0.46285600  | -0.00007300 |
|         | H | -1.28987900        | -0.85751100 | -0.88358200 |
|         | H | -1.28993000        | -0.85740500 | 0.88363500  |
| Energy: |   | -155.10598089 a.u. |             |             |
|         | O | 0.00000000         | 0.00000000  | 0.11772300  |
| Water   | H | 0.00000000         | 0.75999600  | -0.47089200 |
|         | H | 0.00000000         | -0.75999600 | -0.47089200 |
| Energy: |   | -76.45983966 a.u.  |             |             |

---

## 6. References

1. Bruker, APEX2 (Version 2.1), COSMO (Version 1.56), BIS (Version 2.0.1.9), SAINT (Version 7.3A) and SADABS (Version 2004/1) & XPREP (Version 2005/4), Bruker AXS Inc., Madison, Wisconsin, USA, **2006**.
2. G.M. Sheldrick, SHELXS-97 and SHELXL-97, University of Göttingen, Germany, **1997**.
3. Coppens, P.; Leiserowitz, L.; Rabinovich, D. *Acta Crystallogr.* **1965**, *18*, 1035-1038.
4. Stewart, J. J. P. *Comput. Chem.* **1989**, *10*, 209-220.
5. J. J. P. Stewart, *J. Comput. Chem.* **1989**, *10*, 221-264.
6. Frisch, M. J.; Trucks, G. W.; Schlegel, H. B.; Scuseria, G. E.; Robb, M. A.; Cheeseman, J. R.; Scalmani, G.; Barone, V.; Mennucci, B.; Petersson, G. A.; Nakatsuji, H.; Caricato, M.; Li, X.; Hratchian, H. P.; Izmaylov, A. F.; Bloino, J.; Zheng, G.; Sonnenberg, J. L.; Hada, M.; Ehara, M.; Toyota, K.; Fukuda, R.; Hasegawa, J.; Ishida, M.; Nakajima, T.; Honda, Y.; Kitao, O.; Nakai, H.; Vreven, T.; Montgomery, J. A., Jr.; Peralta, J. E.; Ogliaro, F.; Bearpark, M.; Heyd, J. J.; Brothers, E.; Kudin, K. N.; Staroverov, V. N.; Kobayashi, R.; Normand, J.; Raghavachari, K.; Rendell, A.; Burant,

J. C.; Iyengar, S. S.; Tomasi, J.; Cossi, M.; Rega, N.; Millam, J. M.; Klene, M.; Knox, J. E.; Cross, J. B.; Bakken, V.; Adamo, C.; Jaramillo, J.; Gomperts, R.; Stratmann, R. E.; Yazyev, O.; Austin, A. J.; Cammi, R.; Pomelli, C.; Ochterski, J. W.; Martin, R. L.; Morokuma, K.; Zakrzewski, V. G.; Voth, G. A.; Salvador, P.; Dannenberg, J. J.; Dapprich, S.; Daniels, A. D.; Farkas, Ö.; Foresman, J. B.; Ortiz, J. V.; Cioslowski, J.; Fox, D. J. Gaussian, Inc., Wallingford CT, **2009**.
